# Supplementary material for: N-Difluoromethylation of N-pyridyl-substituted anilines with ethyl bromodifluoroacetate
Source: Royal Society of Chemistry journal article supplement (doi:10.1039/d2ob00119e), 2022-01-01
Supplement: d2ob00119e1.pdf [file d2ob00119e1.pdf]

## Supporting Information

### ***N*-Difluoromethylation of Aniline Derivatives with Difluorocarbene Precursors**

Jindian Duan,<sup>a,c,†</sup> Pui Ying Choy,<sup>b,†</sup> Kin Boon Gan,<sup>b</sup> and Fuk Yee Kwong<sup>\*,a,b</sup>

<sup>a</sup> Department of Applied Biology and Chemical Technology, The Hong Kong Polytechnic University, Hung Hom, Kowloon, Hong Kong, P.R. China

<sup>b</sup> Department of Chemistry and State Key Laboratory of Synthetic Chemistry, The Chinese University of Hong Kong, Shatin, New Territories, Hong Kong, P.R. China

<sup>c</sup> College of Biotechnology and Pharmaceutical Engineering, Nanjing Tech University, Nanjing 211816, P. R. China

<sup>†</sup> The authors contributed equally

Email: [fykwong@cuhk.edu.hk](mailto:fykwong@cuhk.edu.hk)

### ***Table of contents***

|                                                                                               |     |
|-----------------------------------------------------------------------------------------------|-----|
| 1. General Considerations                                                                     | S2  |
| 2. General procedures for synthesis of <i>N</i> -aryl-2-aminopyridines derivatives <b>1</b>   | S3  |
| 3. General procedures for synthesis of <i>N</i> -aryl-2-aminopyrimidines derivatives <b>3</b> | S4  |
| 4. General procedures for <i>N</i> -difluoromethylation of <i>N</i> -aryl-2-aminopyridines    | S4  |
| 5. General procedures for <i>N</i> -difluoromethylation of <i>N</i> -aryl-2-aminopyrimidines  | S5  |
| 6. General procedures for large-scale synthesis of compound <b>2a</b> and <b>2m</b>           | S5  |
| 7. General procedures for deuterium-labelling experiments                                     | S5  |
| 8. Characterization data for all compounds                                                    | S6  |
| 9. <sup>1</sup> H, <sup>13</sup> C, and <sup>19</sup> F NMR spectra                           | S17 |
| 10. <sup>1</sup> H spectra for D-labelling experiments                                        | S67 |
| 11. References                                                                                | S71 |

## 1. General Considerations

Unless otherwise noted, all reagents were purchased from commercial suppliers and used without purification. All reactions were performed in a resealable screw-capped Schlenk flask (approx. 20 mL volume) in the presence of Teflon coated magnetic stirrer bar (4 mm × 10 mm). Thin layer chromatography was performed on precoated silica gel 60 F<sub>254</sub> plates. Silica gel (230-400 mesh) was used for column chromatography. <sup>1</sup>H NMR spectra were recorded on a 400 MHz spectrometer. Spectra were referenced internally to the residual proton resonance in CDCl<sub>3</sub> (δ 7.26 ppm), or with TMS (δ 0.00 ppm) as the internal standard. Chemical shifts (δ) were reported as part per million (ppm) in δ scale downfield from TMS. <sup>13</sup>C NMR spectra were recorded on a 100 MHz spectrometer and the spectra were referenced to CDCl<sub>3</sub> (δ = 77.16 ppm, the middle peak). <sup>19</sup>F NMR spectra were recorded on a 376 MHz spectrometer. Coupling constants (*J*) were reported in Hertz (Hz). High-resolution mass spectra (HRMS) were obtained on a ESI-QToF mass spectrometer which the ionization method is electrospray ionization (ESI) and the mass analyzer is a quadrupole time-of-flight mass analyzer. GC-MS analysis was conducted on a GCD system. Products described in GC yield were accorded to the authentic samples/dodecane calibration standard from GCFID system.

## 2. General procedures for synthesis of *N*-aryl-2-aminopyridines derivatives 1

*N*-Aryl-2-aminopyridines were prepared according to the previously reported procedures.<sup>1</sup> CuI (2 mg, 1 mol%), amine (1.5 mmol), KO<sup>t</sup>-Bu (224 mg, 2.0 mmol), and solid aryl bromides (1.0 mmol) were added in a 10 mL flask equipped with a Teflon valve. The tube was evacuated and backfilled with nitrogen. Dioxane (1.5 mL), aryl bromides (1.0 mmol, if liquid) were added by syringe. The reaction mixture was allowed to stir at 160 °C for indicated time. The mixture was cooled to room temperature and extracted with ethyl acetate. The combined organic phase was washed with brine and dried over Na<sub>2</sub>SO<sub>4</sub>. The organic layers were collected, filtered and the solvent was removed under vacuum. The residue was purified by column chromatography on silica gel.

### *N*-(5-Bromo-2-methylphenyl)pyridin-2-amine (compound 1p)

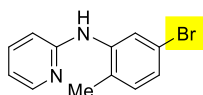

2-Bromopyridine (157 mg, 1.0 mmol) and 5-bromo-2-methylaniline (185 mg, 1.0 mmol) were used with the above general procedures heating at 160 °C for 7 h to give **1p** as white solid (209 mg, 80%); m.p. = 105-107 °C; ethyl acetate/hexane = 1:10, *R<sub>f</sub>* = 0.5; <sup>1</sup>H NMR (400 MHz, CDCl<sub>3</sub>) δ 8.20 (dd, *J* = 5.2, 1.2 Hz, 1H), 7.69 (d, *J* = 1.6 Hz, 1H), 7.53-7.49 (m, 1H), 7.16-7.13 (m, 1H), 7.09 (d, *J* = 8.0 Hz, 1H), 6.78-6.72 (m, 2H), 6.30 (s, 1H), 2.22 (s, 3H); <sup>13</sup>C NMR (100 MHz, CDCl<sub>3</sub>) δ 155.9, 148.7, 140.2, 138.0, 132.3, 128.9, 126.6, 124.2, 119.9, 115.6, 108.5, 17.8; HRMS (ESI-TOF) *m/z*: [M+H]<sup>+</sup> Calcd for C<sub>12</sub>H<sub>12</sub>N<sub>2</sub>Br 263.0184; Found 263.0182.

### *N*-(2,6-Dimethylphenyl)-6-methylpyridin-2-amine (compound 1y)

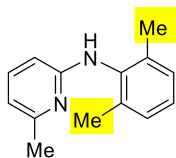

2-Bromo-6-methylpyridine (171 mg, 1.0 mmol) and 2,6-dimethylaniline (121 mg, 1.0 mmol) were used with the above general procedures heating at 160 °C for 7 h to give **1y** as white solid (159 mg, 75%); m.p. = 95-97 °C; ethyl acetate/hexane = 1:10, *R<sub>f</sub>* = 0.7; <sup>1</sup>H NMR (400 MHz, CDCl<sub>3</sub>) δ 7.25 (t, *J* = 7.8 Hz, 1H), 7.13 (s, 3H), 6.50 (d, *J* = 7.3 Hz, 1H), 6.05 (bs, 1H), 5.76 (d, *J* = 8.3 Hz, 1H), 2.43 (s, 3H), 2.23 (s, 6H); <sup>13</sup>C NMR (100 MHz, CDCl<sub>3</sub>) δ 157.4 (2C), 138.3, 137.0, 136.7, 128.7, 126.8, 113.2, 102.4, 24.4, 18.6; HRMS (ESI-TOF) *m/z*: [M+H]<sup>+</sup> Calcd for C<sub>14</sub>H<sub>17</sub>N<sub>2</sub> 213.1392; Found

213.1388.

### 3. General procedures for synthesis of *N*-aryl-2-aminopyrimidines derivatives 3

*N*-aryl-2-aminopyrimidines were prepared according to the previously reported procedures.<sup>2</sup> Aniline derivatives (7.5 mmol), 2-chloro-pyrimidine (0.57 g, 5.0 mmol) and acetic acid (5 mL) in 1,4-dioxane (13 mL) were added in an oven-dried flask. The reaction mixture was stirred at 110 °C for 9 h and monitored by TLC. Upon completion, the mixture was cooled to room temperature and extracted with dichloromethane. The combined organic phase was washed with brine and dried over Na<sub>2</sub>SO<sub>4</sub>. The organic layers were collected, filtered and the solvent was removed under vacuum. The residue was purified by column chromatography on silica gel. Recrystallization was carried out if needed.

#### *N*-(5-Bromo-2-methylphenyl)pyrimidin-2-amine (compound 3d)

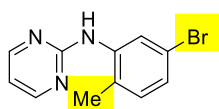

5-Bromo-2-methylaniline (185 mg, 1.0 mmol), 2-chloro-pyrimidine (171 mg, 1.5 mmol), and acetic acid (90 mg, 1.5 mmol) in 1,4-dioxane (1.0 mL) were used with the above general procedures heating at 110 °C for 9 h to give **3d** as white solid (152 mg, 58%); m.p. = 131-132 °C; ethyl acetate/hexane = 1:5, R<sub>f</sub> = 0.3; <sup>1</sup>H NMR (400 MHz, CDCl<sub>3</sub>) δ 8.42 (d, *J* = 4.8 Hz, 2H), 8.32 (d, *J* = 1.9 Hz, 1H), 7.15-7.12 (m, 1H), 7.06-7.04 (d, *J* = 8.0 Hz, 1H), 7.00 (bs, 1H), 6.74 (t, *J* = 4.8 Hz, 1H), 2.27 (s, 3H); <sup>13</sup>C NMR (100 MHz, CDCl<sub>3</sub>) δ 160.2, 158.2, 138.8, 131.7, 126.9, 126.3, 123.9, 120.0, 113.1, 17.8; HRMS (ESI-TOF) *m/z*: [M+H]<sup>+</sup> Calcd for C<sub>11</sub>H<sub>11</sub>BrN<sub>3</sub> 264.0136; Found 264.0132.

### 4. General procedures for *N*-difluoromethylation of *N*-aryl-2-aminopyridines

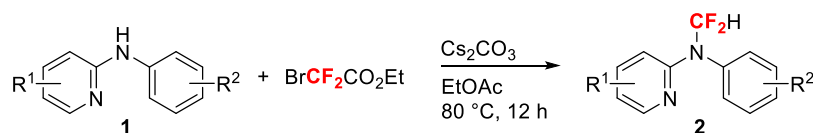

A sealed tube was charged with *N*-aryl-2-aminopyridines **1** (0.3 mmol), ethyl bromodifluoroacetate (0.39 mmol), Cs<sub>2</sub>CO<sub>3</sub> (0.45 mmol), and ethyl acetate (1.0 mL). The reaction mixture was then placed into a preheated oil bath (80 °C) and stirred for 12 hours. After cooling to room temperature, the reaction mixture was diluted with ethyl acetate (10 mL) and filtered through a plug of celite. The filtrate was concentrated under reduced pressure and the crude products were purified by flash chromatography on silica gel (hexane /ethyl acetate) to

afford the corresponding products **2**.

## 5. General procedures for *N*-difluoromethylation of *N*-aryl-2-aminopyrimidines

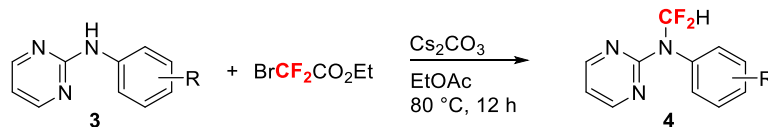

A sealed tube was charged with *N*-aryl-2-aminopyrimidines **3** (0.3 mmol), ethyl bromodifluoroacetate (0.45 mmol), Cs<sub>2</sub>CO<sub>3</sub> (0.45 mmol), and ethyl acetate (1.0 mL). The reaction mixture was then placed into a preheated oil bath (80 °C) and stirred for 12 hours. After cooling to room temperature, the reaction mixture was diluted with ethyl acetate (10 mL) and filtered through a plug of celite. The filtrate was concentrated under reduced pressure and the crude products were purified by flash chromatography on neutral alumina (hexane /ethyl acetate) to afford the corresponding products **4**.

## 6. General procedures for large-scale synthesis of compound **2a** and **2m**

A sealed tube was charged with *N*-phenylpyridin-2-amine (**1a**) or *N*-(2,4-dichlorophenyl)pyridin-2-amine (**1m**) (10.0 mmol), ethyl bromodifluoroacetate (13 mmol, 2.64 g), Cs<sub>2</sub>CO<sub>3</sub> (15 mmol, 4.89 g), and ethyl acetate (20 mL). The reaction mixture was then placed into a preheated oil bath (80 °C) and stirred for 12 hours. After cooling to room temperature, the reaction mixture was diluted with ethyl acetate (30 mL) and filtered through a plug of celite. The filtrate was concentrated under reduced pressure and the crude products were purified by flash chromatography on silica gel (hexane /ethyl acetate) to afford the corresponding products **2a** or **2m** in 94% (2.07 g) and 95% (2.75 g) respectively.

## 7. General procedures for deuterium-labelling experiments

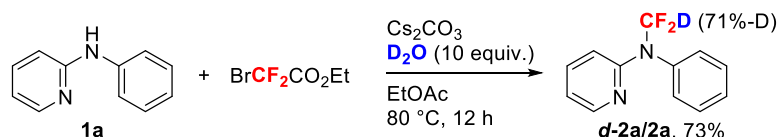

A sealed tube was charged with *N*-phenyl-2-aminopyridines (**1a**) (0.9 mmol), ethyl bromodifluoroacetate (1.17 mmol), Cs<sub>2</sub>CO<sub>3</sub> (1.35 mmol), deuterium oxide (9.0 mmol) and ethyl acetate (4.0 mL). The reaction mixture was then placed into a preheated oil bath (80 °C) and stirred for 12 hours. After cooling to room temperature, the reaction mixture was diluted with

ethyl acetate (10 mL) and filtered through a plug of celite. The filtrate was concentrated under reduced pressure and the crude products were purified by flash chromatography on silica gel (hexane /ethyl acetate) to afford the corresponding product **d-2a/2a** in 73%.

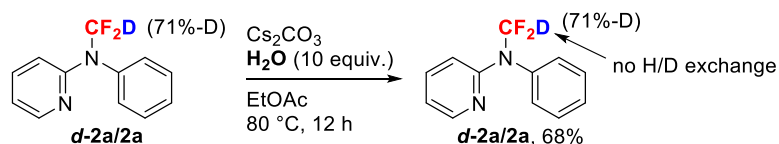

A sealed tube was charged with *N*-(difluoromethyl-*d*)-*N*-phenylpyridin-2-amine (**d-2a/2a**) (0.3 mmol), Cs<sub>2</sub>CO<sub>3</sub> (0.45 mmol), water (3.0 mmol) and ethyl acetate (1.0 mL). The reaction mixture was then placed into a preheated oil bath (80 °C) and stirred for 12 hours. After cooling to room temperature, the reaction mixture was diluted with ethyl acetate (10 mL) and filtered through a plug of celite. The filtrate was concentrated under reduced pressure and the crude products were purified by flash chromatography on silica gel (hexane /ethyl acetate) to afford the corresponding product **d-2a/2a** in 68%.

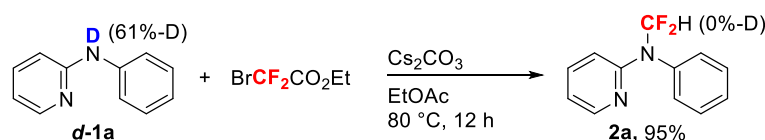

A sealed tube was charged with *N*-phenylpyridin-2-amine-*d* (**d-1a**) (0.3 mmol), Cs<sub>2</sub>CO<sub>3</sub> (0.45 mmol), water (3.0 mmol) and ethyl acetate (1.0 mL). The reaction mixture was then placed into a preheated oil bath (80 °C) and stirred for 12 hours. After cooling to room temperature, the reaction mixture was diluted with ethyl acetate (10 mL) and filtered through a plug of celite. The filtrate was concentrated under reduced pressure and the crude products were purified by flash chromatography on silica gel (hexane /ethyl acetate) to afford the corresponding product **2a** in 95% with 0%-*d*-content.

## 8. Characterization data for all compounds

### *N*-(Difluoromethyl)-*N*-phenylpyridin-2-amine (Product 2a)

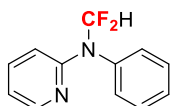

This compound was purified by column chromatography (ethyl acetate/hexane = 1:10, *R<sub>f</sub>*=0.7) to afford a yellow sticky oil in 97% yield (64 mg); <sup>1</sup>H NMR (400 MHz, CDCl<sub>3</sub>) δ 7.92 (t, *J* = 60.9 Hz, 1H), 7.37-7.34 (m, 2H), 7.27 (d, *J* = 7.4 Hz, 1H), 7.08 (t, *J* = 7.4 Hz, 1H), 6.92 (d, *J* = 7.8 Hz, 2H), 6.83-6.79 (m, 1H), 6.42 (d, *J* = 9.7 Hz, 1H), 5.89 (t, *J* = 6.8 Hz, 1H); <sup>13</sup>C NMR (100 MHz, CDCl<sub>3</sub>) δ 150.3,

149.2, 135.6, 129.5, 129.0 (t,  $J = 3.7$  Hz), 122.7, 122.0, 115.7, 108.1 (t,  $J = 248.7$  Hz), 104.4;  $^{19}\text{F}$  NMR (376 MHz,  $\text{CDCl}_3$ )  $\delta$  -104.2 (s, 2F); HRMS (ESI-TOF)  $m/z$ :  $[\text{M}+\text{H}]^+$  Calcd for  $\text{C}_{12}\text{H}_{11}\text{N}_2\text{F}_2$  221.0885; Found 221.0883.

#### ***N*-(4-Chlorophenyl)-*N*-(difluoromethyl)pyridin-2-amine (product 2b)**

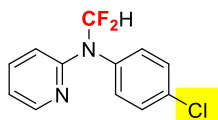

This compound was purified by column chromatography (ethyl acetate/hexane = 1:10,  $R_f=0.7$ ) to afford a yellow sticky oil in 97% yield (74 mg);  $^1\text{H}$  NMR (400 MHz,  $\text{CDCl}_3$ )  $\delta$  7.82 (t,  $J = 60.9$  Hz, 1H), 7.23-7.20 (m, 3H), 6.80-6.74 (m, 3H), 6.33 (d,  $J = 9.7$  Hz, 1H), 5.86 (t,  $J = 6.7$  Hz, 1H);  $^{13}\text{C}$  NMR (100 MHz,  $\text{CDCl}_3$ )  $\delta$  150.5, 147.8, 136.1, 129.5, 129.1 (t,  $J = 3.8$  Hz), 127.7, 123.4, 115.3, 108.0 (t,  $J = 249.1$  Hz), 104.6;  $^{19}\text{F}$  NMR (376 MHz,  $\text{CDCl}_3$ )  $\delta$  -104.3 (s, 2F); HRMS (ESI-TOF)  $m/z$ :  $[\text{M}+\text{H}]^+$  Calcd for  $\text{C}_{12}\text{H}_{10}\text{N}_2\text{F}_2\text{Cl}$  255.0495; Found 255.0493.

#### ***N*-(Difluoromethyl)-*N*-(4-fluorophenyl)pyridin-2-amine (product 2c)**

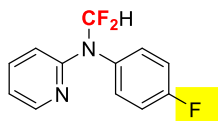

This compound was purified by column chromatography (ethyl acetate/hexane = 1:10,  $R_f=0.7$ ) to afford a yellow sticky oil in 98% yield (64 mg);  $^1\text{H}$  NMR (400 MHz,  $\text{CDCl}_3$ )  $\delta$  7.85 (t,  $J = 60.9$  Hz, 1H), 7.24 (d,  $J = 7.3$  Hz, 1H), 6.99 (t,  $J = 8.6$  Hz, 2H), 6.82-6.78 (m, 3H), 6.36 (d,  $J = 8.9$  Hz, 1H), 5.87 (t,  $J = 6.8$  Hz, 1H);  $^{13}\text{C}$  NMR (100 MHz,  $\text{CDCl}_3$ )  $\delta$  160.2 (d,  $J = 238.8$  Hz), 150.8, 145.3 (d,  $J = 2.5$  Hz), 135.9, 129.1 (t,  $J = 3.8$  Hz), 123.0 (d,  $J = 7.8$  Hz), 116.0 (d,  $J = 22.0$  Hz), 115.4, 108.1 (t,  $J = 248.8$  Hz), 104.5;  $^{19}\text{F}$  NMR (376 MHz,  $\text{CDCl}_3$ )  $\delta$  -104.3 (s, 2F), -121.8 (s, 1F); HRMS (ESI-TOF)  $m/z$ :  $[\text{M}+\text{H}]^+$  Calcd for  $\text{C}_{12}\text{H}_{10}\text{N}_2\text{F}_3$  239.0791; Found 239.0789.

#### **4-((Difluoromethyl)(pyridin-2-yl)amino)benzonitrile (product 2d)**

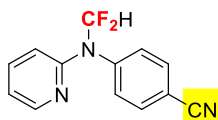

This compound was purified by column chromatography (ethyl acetate/hexane = 1:10,  $R_f=0.7$ ) to afford a yellow sticky oil in 96% yield (71 mg);  $^1\text{H}$  NMR (400 MHz,  $\text{CDCl}_3$ )  $\delta$  7.81 (t,  $J = 60.7$  Hz, 1H), 7.54 (d,  $J = 8.4$  Hz, 2H), 7.29 (d,  $J = 7.2$  Hz, 1H), 6.94-6.90 (m, 3H), 6.37-6.34 (m, 1H), 5.99 (t,  $J = 6.7$  Hz, 1H);  $^{13}\text{C}$  NMR (100 MHz,  $\text{CDCl}_3$ )  $\delta$  153.8, 150.4, 137.2, 133.6, 129.4 (t,  $J = 3.9$  Hz), 122.9, 119.6, 114.9, 108.0 (t,  $J = 254.3$  Hz), 105.4;  $^{19}\text{F}$  NMR (376 MHz,  $\text{CDCl}_3$ )  $\delta$  -104.3 (s, 2F); HRMS (ESI-

TOF)  $m/z$ :  $[M+H]^+$  Calcd for  $C_{13}H_{10}N_3F_2$  246.0837; Found 246.0835.

### 3-((Difluoromethyl)(pyridin-2-yl)amino)benzonitrile (product 2e)

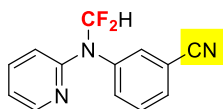

This compound was purified by column chromatography (ethyl acetate/hexane = 1:10,  $R_f$ =0.7) to afford a yellow sticky oil in 98% yield (71 mg);  $^1H$  NMR (400 MHz,  $CDCl_3$ )  $\delta$  7.83 (t,  $J$  = 60.8 Hz, 1H), 7.38 (t,  $J$  = 7.8 Hz, 1H), 7.30-7.27 (m, 2H), 7.13-7.07 (m, 2H), 6.93-6.89 (m, 1H), 6.33 (d,  $J$  = 9.7 Hz, 1H), 5.97 (t,  $J$  = 6.9 Hz, 1H);  $^{13}C$  NMR (100 MHz,  $CDCl_3$ )  $\delta$  150.9, 150.1, 137.0, 130.4, 129.4 (t,  $J$  = 3.9 Hz), 127.1, 126.1, 125.6, 119.0, 114.8, 113.3, 108.0 (t,  $J$  = 249.8 Hz), 105.2;  $^{19}F$  NMR (376 MHz,  $CDCl_3$ )  $\delta$  -104.4 (s, 2F); HRMS (ESI-TOF)  $m/z$ :  $[M+H]^+$  Calcd for  $C_{13}H_{10}N_3F_2$  246.0837; Found 246.0835.

### N-(3-Bromophenyl)-N-(difluoromethyl)pyridin-2-amine (product 2f)

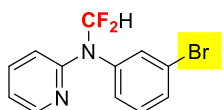

This compound was purified by column chromatography (ethyl acetate/hexane = 1:10,  $R_f$ =0.7) to afford a yellow sticky oil in 96% yield (86 mg);  $^1H$  NMR (400 MHz,  $CDCl_3$ )  $\delta$  7.81 (t,  $J$  = 60.8 Hz, 1H), 7.23 (d,  $J$  = 7.2 Hz, 1H), 7.16-7.13 (m, 2H), 7.02 (s, 1H), 6.84-6.76 (m, 2H), 6.35 (d,  $J$  = 9.7 Hz, 1H), 5.89 (t,  $J$  = 6.8 Hz, 1H);  $^{13}C$  NMR (100 MHz,  $CDCl_3$ )  $\delta$  150.8, 150.6, 136.3, 130.8, 129.0 (t,  $J$  = 3.9 Hz), 125.6, 125.1, 122.9, 120.9, 115.4, 108.0 (t,  $J$  = 249.4 Hz), 104.8;  $^{19}F$  NMR (376 MHz,  $CDCl_3$ )  $\delta$  -104.3 (s, 2F); HRMS (ESI-TOF)  $m/z$ :  $[M+H]^+$  Calcd for  $C_{12}H_{10}N_2BrF_2$  298.9990; Found 298.9987.

### N-(Difluoromethyl)-N-(3-methoxyphenyl)pyridin-2-amine (product 2g)

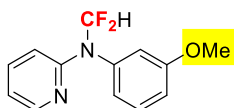

This compound was purified by column chromatography (ethyl acetate/hexane = 1:10,  $R_f$ =0.5) to afford a yellow sticky oil in 94% yield (71 mg);  $^1H$  NMR (400 MHz,  $CDCl_3$ )  $\delta$  7.86 (t,  $J$  = 60.8 Hz, 1H), 7.24-7.19 (m, 2H), 6.80-6.77 (m, 1H), 6.59 (dd,  $J$  = 8.0, 1.6 Hz, 1H), 6.47-6.40 (m, 3H), 5.86 (t,  $J$  = 6.8 Hz, 1H), 3.79 (s, 3H);  $^{13}C$  NMR (100 MHz,  $CDCl_3$ )  $\delta$  160.9, 150.6, 150.3, 135.6, 130.2, 129.0 (t,  $J$  = 3.8 Hz), 115.9, 114.3, 108.7, 108.1 (t,  $J$  = 248.7 Hz), 107.5, 104.4, 55.3;  $^{19}F$  NMR (376 MHz,  $CDCl_3$ )  $\delta$  -104.2 (s, 2F); HRMS (ESI-TOF)  $m/z$ :  $[M+H]^+$  Calcd for  $C_{13}H_{13}ON_2F_2$  251.0990; Found 251.0988.



### Ethyl 3-((difluoromethyl)(pyridin-2-yl)amino)benzoate (product 2h)

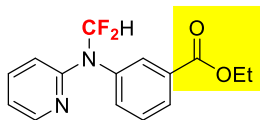

This compound was purified by column chromatography (ethyl acetate/hexane = 1:10,  $R_f$ =0.5) to afford a yellow sticky oil in 56% yield (49 mg);  $^1\text{H NMR}$  (400 MHz,  $\text{CDCl}_3$ )  $\delta$  7.86 (t,  $J$  = 60.9 Hz, 1H), 7.72-7.69 (m, 1H), 7.54-7.53 (m, 1H), 7.36 (t,  $J$  = 7.8 Hz, 1H), 7.26-7.25 (d,  $J$  = 6.4 Hz, 1H), 7.06-7.03 (m, 1H), 6.85-6.80 (m, 1H), 6.35 (d,  $J$  = 9.7 Hz, 1H), 5.90 (t,  $J$  = 6.8 Hz, 1H), 4.36 (q,  $J$  = 7.1 Hz, 2H), 1.38 (t,  $J$  = 7.1 Hz, 3H);  $^{13}\text{C NMR}$  (100 MHz,  $\text{CDCl}_3$ )  $\delta$  166.8, 150.7, 149.4, 136.2, 131.9, 129.5, 129.2 (t,  $J$  = 3.8 Hz), 126.8, 123.9, 123.1, 115.4, 108.1 (t,  $J$  = 249.2 Hz), 104.7, 61.0, 14.5;  $^{19}\text{F NMR}$  (376 MHz,  $\text{CDCl}_3$ )  $\delta$  -104.3 (s, 2F); **HRMS** (ESI-TOF)  $m/z$ :  $[\text{M}+\text{H}]^+$  Calcd for  $\text{C}_{15}\text{H}_{15}\text{O}_2\text{N}_2\text{F}_2$  293.1096; Found 293.1092.

### *N*-(Difluoromethyl)-*N*-(3-(trifluoromethyl)phenyl)pyridin-2-amine (product 2i)

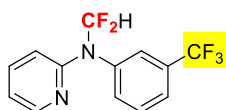

This compound was purified by column chromatography (ethyl acetate/hexane = 1:10,  $R_f$ =0.7) to afford a yellow sticky oil in 95% yield (82 mg);  $^1\text{H NMR}$  (400 MHz,  $\text{CDCl}_3$ )  $\delta$  7.86 (t,  $J$  = 60.8 Hz, 1H), 7.40 (t,  $J$  = 8.0 Hz, 1H), 7.29-7.26 (m, 2H), 7.13 (s, 1H), 7.03 (d,  $J$  = 8.0 Hz), 6.89-6.85 (m, 1H), 6.35 (d,  $J$  = 10.0 Hz, 1H), 5.94 (t,  $J$  = 6.4 Hz, 1H);  $^{13}\text{C NMR}$  (100 MHz,  $\text{CDCl}_3$ )  $\delta$  150.9, 149.9, 136.6, 131.8 (q,  $J$  = 31.6 Hz), 130.0, 129.3 (t,  $J$  = 3.9 Hz), 125.7 (q,  $J$  = 270.7 Hz), 125.6, 119.3 (q,  $J$  = 3.8 Hz), 119.0 (q,  $J$  = 3.7 Hz), 115.2, 108.1 (t,  $J$  = 249.5 Hz), 104.9;  $^{19}\text{F NMR}$  (376 MHz,  $\text{CDCl}_3$ )  $\delta$  -62.7 (s, 3F), -104.4 (s, 2F); **HRMS** (ESI-TOF)  $m/z$ :  $[\text{M}+\text{H}]^+$  Calcd for  $\text{C}_{13}\text{H}_{10}\text{N}_2\text{F}_5$  289.0759; Found 289.0755.

### *N*-(Difluoromethyl)-*N*-(2-methoxyphenyl)pyridin-2-amine (product 2j)

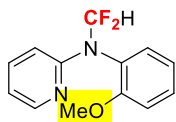

This compound was purified by column chromatography (ethyl acetate/hexane = 1:10,  $R_f$ =0.5) to afford a yellow sticky oil in 94% yield (71 mg);  $^1\text{H NMR}$  (400 MHz,  $\text{CDCl}_3$ )  $\delta$  7.97 (t,  $J$  = 61.0 Hz, 1H), 7.23 (d,  $J$  = 7.2 Hz, 1H), 7.04-7.00 (m, 1H), 6.94-6.90 (m, 2H), 6.86-6.84 (m, 1H), 6.77-6.73 (m, 1H), 6.18 (d,  $J$  = 9.6 Hz, 1H), 5.86 (t,  $J$  = 6.8 Hz, 1H), 3.78 (s, 3H);  $^{13}\text{C NMR}$  (100 MHz,  $\text{CDCl}_3$ )  $\delta$  151.5, 150.7, 138.1, 134.9, 128.7 (t,  $J$  = 3.8 Hz), 123.6, 123.3, 121.4, 116.6, 112.2, 108.2 (t,  $J$  = 248.7 Hz), 104.3, 55.8;  $^{19}\text{F NMR}$  (376 MHz,  $\text{CDCl}_3$ )  $\delta$  -104.1 (s, 2F); **HRMS** (ESI-TOF)  $m/z$ :  $[\text{M}+\text{H}]^+$  Calcd for

C<sub>13</sub>H<sub>13</sub>ON<sub>2</sub>F<sub>2</sub> 251.0990; Found 251.0987.

### ***N*-(Difluoromethyl)-*N*-(2-phenoxyphenyl)pyridin-2-amine (product 2k)**

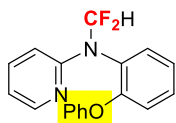

This compound was purified by column chromatography (ethyl acetate/hexane = 1:10, *R<sub>f</sub>*=0.6) to afford a yellow sticky oil in 95% yield (89 mg); **<sup>1</sup>H NMR** (400 MHz, CDCl<sub>3</sub>) δ 7.30-7.14 (m, 3H), 7.13-7.08 (m, 3H), 7.04-6.99 (m, 1H), 6.97-6.93 (m, 2H), 6.80-6.75 (m, 3H), 6.26 (d, *J* = 9.6 Hz, 1H), 5.82 (t, *J* = 6.8 Hz, 1H); **<sup>13</sup>C NMR** (100 MHz, CDCl<sub>3</sub>) δ 157.8, 150.3, 147.0, 140.7, 135.3, 129.3, 128.5 (t, *J* = 3.8 Hz), 125.3, 124.5, 123.6, 122.1 (2C), 116.7, 116.5, 107.9 (t, *J* = 249.4 Hz), 104.5; **<sup>19</sup>F NMR** (376 MHz, CDCl<sub>3</sub>) δ -103.9 (s, 2F); **HRMS** (ESI-TOF) *m/z*: [M+H]<sup>+</sup> Calcd for C<sub>18</sub>H<sub>15</sub>ON<sub>2</sub>F<sub>2</sub> 313.1147; Found 313.1143.

### ***N*-(Difluoromethyl)-*N*-(2,4-dimethoxyphenyl)pyridin-2-amine (product 2l)**

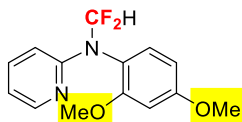

This compound was purified by column chromatography (ethyl acetate/hexane = 1:5, *R<sub>f</sub>*=0.5) to afford a yellow sticky oil in 90% yield (76 mg); **<sup>1</sup>H NMR** (400 MHz, CDCl<sub>3</sub>) δ 7.94 (t, *J* = 61.0 Hz, 1H), 7.21 (d, *J* = 7.3 Hz, 1H), 6.75-6.70 (m, 2H), 6.52-6.51 (m, 1H), 6.46-6.44 (m, 1H), 6.17 (d, *J* = 9.7 Hz, 1H), 5.82 (t, *J* = 6.7 Hz, 1H), 3.78 (s, 3H), 3.74 (s, 3H); **<sup>13</sup>C NMR** (100 MHz, CDCl<sub>3</sub>) δ 156.4, 152.1, 151.0, 134.6, 131.4, 128.6 (t, *J* = 3.8 Hz), 123.1, 116.6, 108.1 (t, *J* = 248.5 Hz), 104.7, 104.1, 100.1, 55.7, 55.6; **<sup>19</sup>F NMR** (376 MHz, CDCl<sub>3</sub>) δ -104.0 (s, 2F); **HRMS** (ESI-TOF) *m/z*: [M+H]<sup>+</sup> Calcd for C<sub>14</sub>H<sub>15</sub> O<sub>2</sub>N<sub>2</sub>F<sub>2</sub> 281.1096; Found 281.1093.

### ***N*-(2,4-Dichlorophenyl)-*N*-(difluoromethyl)pyridin-2-amine (product 2m)**

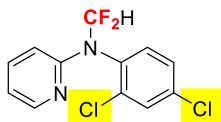

This compound was purified by column chromatography (ethyl acetate/hexane = 1:10, *R<sub>f</sub>*=0.7) to afford a yellow sticky oil in 96% yield (83 mg); **<sup>1</sup>H NMR** (400 MHz, CDCl<sub>3</sub>) δ 7.92 (t, *J* = 60.8 Hz, 1H), 7.40 (d, *J* = 1.6 Hz, 1H), 7.30 (d, *J* = 7.3 Hz, 1H), 7.16 (dd, *J* = 8.8, 2.4 Hz, 1H), 6.91-6.83 (m, 2H), 6.13 (d, *J* = 9.6 Hz, 1H), 5.97 (t, *J* = 6.8 Hz, 1H); **<sup>13</sup>C NMR** (100 MHz, CDCl<sub>3</sub>) δ 150.9, 144.9, 136.5, 129.8, 129.0 (t, *J* = 3.9 Hz), 127.9 (2C), 127.7, 124.3, 115.5, 108.1 (t, *J* = 249.9 Hz), 105.1; **<sup>19</sup>F NMR** (376 MHz, CDCl<sub>3</sub>) δ -104.3 (s, 2F); **HRMS** (ESI-TOF) *m/z*: [M+H]<sup>+</sup> Calcd for C<sub>12</sub>H<sub>9</sub>N<sub>2</sub>Cl<sub>2</sub>F<sub>2</sub> 289.0105;

Found 289.0104.

#### 4-Chloro-3-((difluoromethyl)(pyridin-2-yl)amino)phenol (product 2n)

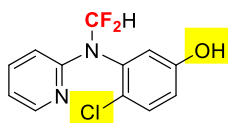

This compound was purified by column chromatography (ethyl acetate/hexane = 1:5,  $R_f$ =0.4) to afford a yellow sticky oil in 94% yield (76 mg);  $^1\text{H NMR}$  (400 MHz,  $\text{CDCl}_3$ )  $\delta$  7.84 (t,  $J$  = 60.7 Hz, 1H), 7.30 (d,  $J$  = 7.2 Hz, 1H), 7.16 (d,  $J$  = 8.6 Hz, 1H), 6.90-6.85 (m, 1H), 6.44 (dd,  $J$  = 8.8, 2.8 Hz, 1H), 6.36 (d,  $J$  = 2.8, 1H), 6.14 (d,  $J$  = 9.6 Hz, 1H), 5.97 (t,  $J$  = 6.6 Hz, 1H);  $^{13}\text{C NMR}$  (100 MHz,  $\text{CDCl}_3$ )  $\delta$  155.5, 151.2, 146.6, 136.4, 130.7, 128.9 (t,  $J$  = 3.9 Hz), 118.6, 116.1, 111.5, 110.7, 108.2 (t,  $J$  = 250.1 Hz), 105.2;  $^{19}\text{F NMR}$  (376 MHz,  $\text{CDCl}_3$ )  $\delta$  -103.9 (s, 2F); **HRMS** (ESI-TOF)  $m/z$ :  $[\text{M}+\text{H}]^+$  Calcd for  $\text{C}_{12}\text{H}_{10}\text{ON}_2\text{ClF}_2$  271.0444; Found 271.0442.

#### *N*-(2-Bromo-4-methylphenyl)-*N*-(difluoromethyl)pyridin-2-amine (product 2o)

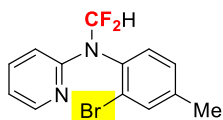

This compound was purified by column chromatography (ethyl acetate/hexane = 1:10,  $R_f$ =0.7) to afford a yellow sticky oil in 98% yield (92 mg);  $^1\text{H NMR}$  (400 MHz,  $\text{CDCl}_3$ )  $\delta$  7.95 (t,  $J$  = 60.9 Hz, 1H), 7.41 (d,  $J$  = 0.8 Hz, 1H), 7.29 (d,  $J$  = 7.2 Hz, 1H), 7.06-7.03 (m, 1H), 6.85-6.80 (m, 2H), 6.79 (d,  $J$  = 9.7 Hz, 1H), 6.17 (d,  $J$  = 10.0 Hz, 1H), 5.91 (t,  $J$  = 6.6 Hz, 1H), 2.30 (s, 3H);  $^{13}\text{C NMR}$  (100 MHz,  $\text{CDCl}_3$ )  $\delta$  150.7, 144.7, 135.9, 133.7, 133.6, 129.1, 128.9 (t,  $J$  = 3.8 Hz), 122.9, 117.2, 115.8, 108.2 (t,  $J$  = 249.4 Hz), 104.7, 20.5;  $^{19}\text{F NMR}$  (376 MHz,  $\text{CDCl}_3$ )  $\delta$  -104.1 (s, 2F); **HRMS** (ESI-TOF)  $m/z$ :  $[\text{M}+\text{H}]^+$  Calcd for  $\text{C}_{13}\text{H}_{12}\text{N}_2\text{BrF}_2$  313.0146; Found 313.0143.

#### *N*-(5-Bromo-2-methylphenyl)-*N*-(difluoromethyl)pyridin-2-amine (product 2p)

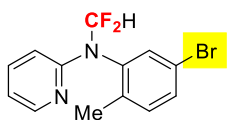

This compound was purified by column chromatography (ethyl acetate/hexane = 1:10,  $R_f$ =0.7) to afford a yellow sticky oil in 98% yield (92 mg);  $^1\text{H NMR}$  (400 MHz,  $\text{CDCl}_3$ )  $\delta$  7.90 (t,  $J$  = 61.0 Hz, 1H), 7.27-7.25 (m, 1H), 7.09-7.04 (m, 2H), 6.93 (s, 1H), 6.85-6.81 (m, 1H), 6.20 (d,  $J$  = 9.7 Hz, 1H), 5.90 (t,  $J$  = 6.6 Hz, 1H), 2.06 (s, 3H);  $^{13}\text{C NMR}$  (100 MHz,  $\text{CDCl}_3$ )  $\delta$  149.8, 149.1, 136.2, 132.0, 129.6, 129.0 (t,  $J$  = 3.9 Hz), 125.6, 123.9, 119.6, 115.4, 108.0 (t,  $J$  = 249.3 Hz), 104.6, 17.5;  $^{19}\text{F NMR}$  (376 MHz,  $\text{CDCl}_3$ )  $\delta$  -104.5 (s, 2F); **HRMS** (ESI-TOF)  $m/z$ :  $[\text{M}+\text{H}]^+$  Calcd for  $\text{C}_{13}\text{H}_{12}\text{N}_2\text{BrF}_2$  313.0146; Found

313.0144.

### ***N*-(2,3-Dichlorophenyl)-*N*-(difluoromethyl)pyridin-2-amine (product 2q)**

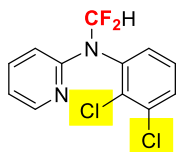

This compound was purified by column chromatography (ethyl acetate/hexane = 1:10,  $R_f$ =0.7) to afford a yellow sticky oil in 96% yield (83 mg);  $^1\text{H NMR}$  (400 MHz,  $\text{CDCl}_3$ )  $\delta$  7.93 (t,  $J$  = 60.8 Hz, 1H), 7.30 (d,  $J$  = 7.2 Hz, 1H), 7.15-7.08 (m, 2H), 6.91-6.86 (m, 1H), 6.84-6.79 (m, 1H), 6.14 (d,  $J$  = 9.6 Hz, 1H), 5.97 (t,  $J$  = 6.7 Hz, 1H);  $^{13}\text{C NMR}$  (100 MHz,  $\text{CDCl}_3$ )  $\delta$  150.8, 148.1, 136.5, 133.7, 129.0 (t,  $J$  = 3.9 Hz), 127.6, 125.7, 124.3, 121.6, 115.6, 108.0 (t,  $J$  = 249.9 Hz), 105.1;  $^{19}\text{F NMR}$  (376 MHz,  $\text{CDCl}_3$ )  $\delta$  -104.2 (s, 2F); **HRMS** (ESI-TOF)  $m/z$ :  $[\text{M}+\text{H}]^+$  Calcd for  $\text{C}_{12}\text{H}_9\text{N}_2\text{Cl}_2\text{F}_2$  289.0105; Found 289.0103.

### ***N*-(Difluoromethyl)-*N*-(3,5-dimethylphenyl)pyridin-2-amine (product 2r)**

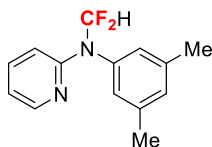

This compound was purified by column chromatography (ethyl acetate/hexane = 1:10,  $R_f$ =0.7) to afford a yellow sticky oil in 98% yield (73 mg);  $^1\text{H NMR}$  (400 MHz,  $\text{CDCl}_3$ )  $\delta$  7.87 (t,  $J$  = 61.0 Hz, 1H), 7.22 (d,  $J$  = 7.3 Hz, 1H), 6.79-6.75 (m, 1H), 6.70 (s, 1H), 6.51 (s, 2H), 6.41 (d,  $J$  = 9.7 Hz, 1H), 5.85 (t,  $J$  = 6.7 Hz, 1H), 2.30 (s, 6H);  $^{13}\text{C NMR}$  (100 MHz,  $\text{CDCl}_3$ )  $\delta$  150.1, 149.1, 139.1, 135.3, 128.9 (t,  $J$  = 3.7 Hz), 124.5, 119.6, 116.0, 108.1 (t,  $J$  = 248.6 Hz), 104.2, 21.4;  $^{19}\text{F NMR}$  (376 MHz,  $\text{CDCl}_3$ )  $\delta$  -104.2 (s, 2F); **HRMS** (ESI-TOF)  $m/z$ :  $[\text{M}+\text{H}]^+$  Calcd for  $\text{C}_{14}\text{H}_{15}\text{N}_2\text{F}_2$  249.1198; Found 249.1194.

### ***N*-(Difluoromethyl)-*N*-(naphthalen-1-yl)pyridin-2-amine (product 2s)**

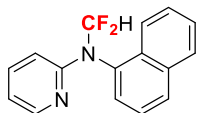

This compound was purified by column chromatography (ethyl acetate/hexane = 1:10,  $R_f$ =0.7) to afford a yellow sticky oil in 97% yield (79 mg);  $^1\text{H NMR}$  (400 MHz,  $\text{CDCl}_3$ )  $\delta$  8.14 (t,  $J$  = 61.0 Hz, 1H), 8.04 (d,  $J$  = 8.2 Hz, 1H), 7.88 (d,  $J$  = 8.0 Hz, 1H), 7.60 (d,  $J$  = 8.2 Hz, 1H), 7.54-7.44 (m, 3H), 7.33 (d,  $J$  = 7.3 Hz, 1H), 6.97 (d,  $J$  = 7.2 Hz, 1H), 6.75-6.71 (m, 1H), 6.30 (d,  $J$  = 9.7 Hz, 1H), 5.88 (t,  $J$  = 6.7 Hz, 1H);  $^{13}\text{C NMR}$  (100 MHz,  $\text{CDCl}_3$ )  $\delta$  150.5, 145.7, 135.7, 134.9, 128.9 (t,  $J$  = 3.9 Hz), 128.5, 128.1, 126.4, 126.2, 125.3, 123.8, 122.8, 116.0, 115.8, 108.3 (t,  $J$  = 249.1 Hz), 104.5;  $^{19}\text{F NMR}$  (376 MHz,

CDCl<sub>3</sub>)  $\delta$  -104.3 (s, 2F); **HRMS** (ESI-TOF)  $m/z$ : [M+H]<sup>+</sup> Calcd for C<sub>16</sub>H<sub>13</sub>N<sub>2</sub>F<sub>2</sub> 271.1041; Found 271.1037.

#### ***N*-(Difluoromethyl)-*N*-phenyl-5-(trifluoromethyl)pyridin-2-amine (product 2t)**

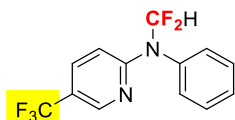

This compound was purified by column chromatography (ethyl acetate/hexane = 1:10,  $R_f$ =0.8) to afford a yellow sticky oil in 97% yield (84 mg); **<sup>1</sup>H NMR** (400 MHz, CDCl<sub>3</sub>)  $\delta$  7.87 (t,  $J$  = 60.6 Hz, 1H), 7.69 (s, 1H), 7.39-7.35 (m, 2H), 7.11 (t,  $J$  = 7.4 Hz, 1H), 6.89-6.85 (m, 3H), 6.50 (d,  $J$  = 10.4 Hz, 1H); **<sup>13</sup>C NMR** (100 MHz, CDCl<sub>3</sub>)  $\delta$  148.7, 148.1, 130.5 (q,  $J$  = 2.0 Hz), 129.7, 129.6 (t,  $J$  = 4.2 Hz), 123.6, 121.9 (q,  $J$  = 267.7 Hz), 121.5, 116.8, 108.7 (q,  $J$  = 34.9 Hz), 107.9 (t,  $J$  = 251.6 Hz); **<sup>19</sup>F NMR** (376 MHz, CDCl<sub>3</sub>)  $\delta$  -64.4 (s, 3F), -104.6 (s, 2F); **HRMS** (ESI-TOF)  $m/z$ : [M+H]<sup>+</sup> Calcd for C<sub>13</sub>H<sub>10</sub>N<sub>2</sub>F<sub>5</sub> 289.0759; Found 289.0755.

#### ***N*-(Difluoromethyl)-5-nitro-*N*-phenylpyridin-2-amine (product 2u)**

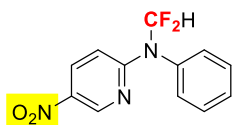

This compound was purified by column chromatography (ethyl acetate/hexane = 1:10,  $R_f$ =0.5) to afford a yellow sticky oil in 50% yield (40 mg); **<sup>1</sup>H NMR** (400 MHz, CDCl<sub>3</sub>)  $\delta$  8.62 (d,  $J$  = 2.8 Hz, 1H), 7.85 (t,  $J$  = 60.2 Hz, 1H), 7.50 (dd,  $J$  = 10.8, 2.8 Hz, 1H), 7.35 (t,  $J$  = 7.6 Hz, 2H), 7.11 (t,  $J$  = 7.2 Hz, 1H), 6.85-6.83 (m, 2H), 6.44 (d,  $J$  = 10.4 Hz, 1H); **<sup>13</sup>C NMR** (100 MHz, CDCl<sub>3</sub>)  $\delta$  147.8, 147.3, 133.2 (t,  $J$  = 4.2 Hz), 130.6, 129.8 (2C), 124.2, 121.0, 115.4, 107.8 (t,  $J$  = 254.7 Hz); **<sup>19</sup>F NMR** (376 MHz, CDCl<sub>3</sub>)  $\delta$  -104.5 (s, 2F); **HRMS** (ESI-TOF)  $m/z$ : [M+H]<sup>+</sup> Calcd for C<sub>12</sub>H<sub>10</sub>O<sub>2</sub>N<sub>3</sub>F<sub>2</sub> 266.0736; Found 266.0732.

#### ***N*-(3-Chlorophenyl)-*N*-(difluoromethyl)-3-methylpyridin-2-amine (product 2v)**

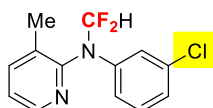

This compound was purified by column chromatography (ethyl acetate/hexane = 1:10,  $R_f$ =0.7) to afford a yellow sticky oil in 78% yield (63 mg); **<sup>1</sup>H NMR** (400 MHz, CDCl<sub>3</sub>)  $\delta$  7.80 (t,  $J$  = 61.2 Hz, 1H), 7.21 (d,  $J$  = 7.2 Hz, 1H), 7.10 (t,  $J$  = 7.9 Hz, 1H), 6.92-6.90 (m, 1H), 6.79 (t,  $J$  = 2.0 Hz, 1H), 6.72-6.66 (m, 2H), 5.91 (t,  $J$  = 6.9 Hz, 1H), 1.63 (s, 3H); **<sup>13</sup>C NMR** (100 MHz, CDCl<sub>3</sub>)  $\delta$  151.4, 147.6, 137.0, 133.9, 129.2, 127.3 (t,  $J$  = 4.3 Hz), 127.2, 121.4, 121.3, 119.6, 109.0 (t,  $J$  = 249.5 Hz), 104.6, 22.3;

**<sup>19</sup>F NMR** (376 MHz, CDCl<sub>3</sub>) δ -103.2 (s, 2F); **HRMS** (ESI-TOF) *m/z*: [M+H]<sup>+</sup> Calcd for C<sub>13</sub>H<sub>12</sub>N<sub>2</sub>ClF<sub>2</sub> 269.0652; Found 269.0648.

***N*-(4-Chlorophenyl)-*N*-(difluoromethyl)-3-methylpyridin-2-amine (product 2w)**

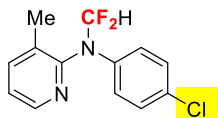

This compound was purified by column chromatography (ethyl acetate/hexane = 1:10, *R<sub>f</sub>*=0.7) to afford a yellow sticky oil in 74% yield (59 mg); **<sup>1</sup>H NMR** (400 MHz, CDCl<sub>3</sub>) δ 7.80 (t, *J* = 61.2 Hz, 1H), 7.20 (d, *J* = 7.2 Hz, 1H), 7.17-7.13 (m, 2H), 6.72-6.67 (m, 3H), 5.88 (t, *J* = 6.9 Hz, 1H), 1.60 (s, 3H); **<sup>13</sup>C NMR** (100 MHz, CDCl<sub>3</sub>) δ 148.7, 147.6, 136.8, 128.2, 127.3 (t, *J* = 4.2 Hz), 127.2, 126.5, 122.5, 109.0 (t, *J* = 249.4 Hz), 104.5, 22.42; **<sup>19</sup>F NMR** (376 MHz, CDCl<sub>3</sub>) δ -103.1 (s, 2F); **HRMS** (ESI-TOF) *m/z*: [M+H]<sup>+</sup> Calcd for C<sub>13</sub>H<sub>12</sub>N<sub>2</sub>ClF<sub>2</sub> 269.0652; Found 269.0649.

***N*-(2-Chlorophenyl)-*N*-(difluoromethyl)-6-methylpyridin-2-amine (product 2x)**

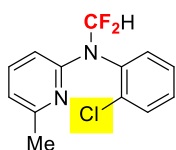

This compound was purified by column chromatography (ethyl acetate/hexane = 1:10, *R<sub>f</sub>*=0.7) to afford a yellow sticky oil in 98% yield (79 mg); **<sup>1</sup>H NMR** (400 MHz, CDCl<sub>3</sub>) δ 8.40 (t, *J* = 59.5 Hz, 1H), 7.39 (dd, *J* = 8.0, 1.3 Hz, 1H), 7.19 (td, *J* = 7.6, 1.3 Hz, 1H), 6.96 (td, *J* = 8.0, 1.2 Hz, 1H), 6.90 (dd, *J* = 7.6, 1.2 Hz, 1H), 6.72-6.68 (m, 1H), 6.01 (d, *J* = 9.2 Hz, 1H), 5.69 (d, *J* = 6.4 Hz, 1H), 2.46 (s, 3H); **<sup>13</sup>C NMR** (100 MHz, CDCl<sub>3</sub>) δ 153.1, 146.3, 142.8, 136.0, 130.1, 127.7, 126.9, 123.6, 123.6, 113.4, 110.4 (t, *J* = 250.4 Hz), 106.7, 19.5 (t, *J* = 6.8 Hz); **<sup>19</sup>F NMR** (376 MHz, CDCl<sub>3</sub>) δ -101.2 (s, 2F); **HRMS** (ESI-TOF) *m/z*: [M+H]<sup>+</sup> Calcd for C<sub>13</sub>H<sub>12</sub>N<sub>2</sub>ClF<sub>2</sub> 269.0652; Found 269.0649.

***N*-(Difluoromethyl)-*N*-(2,6-dimethylphenyl)-6-methylpyridin-2-amine (product 2y)**

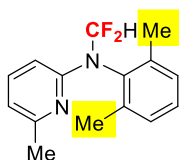

This compound was purified by column chromatography (ethyl acetate/hexane = 1:10, *R<sub>f</sub>*=0.8) to afford a yellow sticky oil in 95% yield (75 mg); **<sup>1</sup>H NMR** (400 MHz, CDCl<sub>3</sub>) δ 8.54 (t, *J* = 59.8 Hz, 1H), 7.06 (d, *J* = 7.4 Hz, 1H), 6.90 (t, *J* = 7.4 Hz, 1H), 6.62-6.58 (m, 1H), 5.77 (d, *J* = 9.6 Hz, 1H), 5.60 (d, *J* = 6.3 Hz, 1H), 2.46 (s, 3H), 2.09 (s, 6H); **<sup>13</sup>C NMR** (100 MHz, CDCl<sub>3</sub>) δ 151.2, 146.3, 142.7, 135.2,

129.1, 128.1, 122.4, 113.3, 110.2 (t,  $J = 249.4$  Hz), 105.8, 19.5 (t,  $J = 6.7$  Hz), 18.1;  $^{19}\text{F}$  NMR (376 MHz,  $\text{CDCl}_3$ )  $\delta$  -101.5 (s, 2F); HRMS (ESI-TOF)  $m/z$ :  $[\text{M}+\text{H}]^+$  Calcd for  $\text{C}_{15}\text{H}_{17}\text{N}_2\text{F}_2$  263.1354; Found 263.1351.

#### ***N*-(Difluoromethyl)-*N*-phenylquinolin-2-amine (product 2z)**

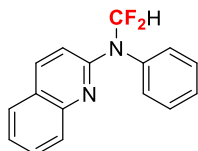

This compound was purified by column chromatography (ethyl acetate/hexane = 1:10,  $R_f=0.7$ ) to afford a yellow sticky oil in 82% yield (66 mg);  $^1\text{H}$  NMR (400 MHz,  $\text{CDCl}_3$ )  $\delta$  8.40 (t,  $J = 59.1$  Hz, 1H), 7.78-7.76 (m, 1H), 7.44 (t,  $J = 7.6$  Hz, 1H), 7.39-7.32 (m, 3H), 7.17-7.09 (m, 3H), 6.90 (d,  $J = 7.6$  Hz, 2H), 6.46 (d,  $J = 9.9$  Hz, 1H);  $^{13}\text{C}$  NMR (100 MHz,  $\text{CDCl}_3$ )  $\delta$  150.3, 148.7, 136.4, 135.8, 130.5, 129.5, 128.7, 123.2, 123.0, 121.7, 121.0, 116.3 (t,  $J = 6.6$  Hz), 115.2, 111.1 (t,  $J = 247.5$  Hz);  $^{19}\text{F}$  NMR (376 MHz,  $\text{CDCl}_3$ )  $\delta$  -106.0 (s, 2F); HRMS (ESI-TOF)  $m/z$ :  $[\text{M}+\text{H}]^+$  Calcd for  $\text{C}_{16}\text{H}_{13}\text{N}_2\text{F}_2$  271.1041; Found 271.1038.

#### ***N*-(Difluoromethyl)-*N*-phenylpyrimidin-2-amine (product 4a)**

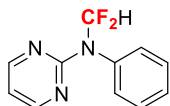

This compound was purified by column chromatography (ethyl acetate/hexane = 1:5,  $R_f=0.4$ ) to afford a yellow sticky oil in 86% yield (57 mg);  $^1\text{H}$  NMR (400 MHz,  $\text{CDCl}_3$ )  $\delta$  8.19-8.17 (m, 1H), 7.83-7.53 (m, 2H), 7.34-7.29 (m, 2H), 7.07-7.00 (m, 3H), 5.96-5.94 (q,  $J = 3.6$  Hz, 1H);  $^{13}\text{C}$  NMR (100 MHz,  $\text{CDCl}_3$ )  $\delta$  163.7, 147.2, 146.4, 138.4, 128.9, 123.3, 122.7, 108.6 (t,  $J = 252.5$  Hz), 102.1;  $^{19}\text{F}$  NMR (376 MHz,  $\text{CDCl}_3$ )  $\delta$  -104.0 (s, 2F); HRMS (ESI-TOF)  $m/z$ :  $[\text{M}+\text{H}]^+$  Calcd for  $\text{C}_{11}\text{H}_{10}\text{N}_3\text{F}_2$  222.0843; Found 222.0840.

#### ***N*-(4-Chlorophenyl)-*N*-(difluoromethyl)pyrimidin-2-amine (product 4b)**

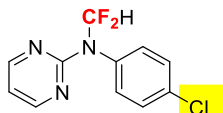

This compound was purified by column chromatography (ethyl acetate/hexane = 1:5,  $R_f=0.4$ ) to afford a yellow sticky oil in 85% yield (65 mg);  $^1\text{H}$  NMR (400 MHz,  $\text{CDCl}_3$ )  $\delta$  8.19 (t,  $J = 2.8$  Hz, 1H), 7.64 (t,  $J = 60.6$  Hz, 1H), 7.55 (dd,  $J = 7.2, 2.4$  Hz, 1H), 7.26-7.23 (m, 2H), 7.02-6.97 (m, 2H), 6.00-5.98 (q,  $J = 3.6$  Hz, 1H);  $^{13}\text{C}$  NMR (100 MHz,  $\text{CDCl}_3$ )  $\delta$  163.9, 146.7, 145.8, 138.5 (t,  $J = 3.5$  Hz),

128.8, 128.4, 124.2, 108.6 (t,  $J = 252.5$  Hz), 102.4;  $^{19}\text{F}$  NMR (376 MHz,  $\text{CDCl}_3$ )  $\delta$  -104.1 (s, 2F); HRMS (ESI-TOF)  $m/z$ :  $[\text{M}+\text{H}]^+$  Calcd for  $\text{C}_{11}\text{H}_9\text{ClN}_3\text{F}_2$  256.0453; Found 256.0449.

#### ***N*-(3-Bromophenyl)-*N*-(difluoromethyl)pyrimidin-2-amine (product 4c)**

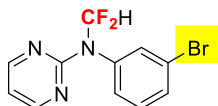

This compound was purified by column chromatography (ethyl acetate/hexane = 1:5,  $R_f=0.4$ ) to afford a yellow sticky oil in 83% yield (74 mg);  $^1\text{H}$  NMR (400 MHz,  $\text{CDCl}_3$ )  $\delta$  8.22-8.21 (m, 1H), 7.64 (t,  $J = 60.6$  Hz, 1H), 7.56 (dd,  $J = 7.2, 2.4$  Hz, 1H), 7.25 (s, 1H), 7.18-7.14 (m, 2H), 7.00-6.96 (m, 1H), 6.02-6.00 (q,  $J = 3.6$  Hz, 1H);  $^{13}\text{C}$  NMR (100 MHz,  $\text{CDCl}_3$ )  $\delta$  164.1, 148.8, 146.9, 138.5, 130.1, 126.2, 126.0, 122.4, 121.7, 108.6 (t,  $J = 253.1$  Hz), 102.5;  $^{19}\text{F}$  NMR (376 MHz,  $\text{CDCl}_3$ )  $\delta$  -104.1 (s, 2F); HRMS (ESI-TOF)  $m/z$ :  $[\text{M}+\text{H}]^+$  Calcd for  $\text{C}_{11}\text{H}_9\text{BrN}_3\text{F}_2$  299.9948; Found 299.9945.

#### ***N*-(5-Bromo-2-methylphenyl)-*N*-(difluoromethyl)pyrimidin-2-amine (product 4d)**

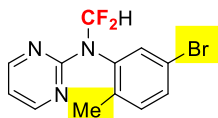

This compound was purified by column chromatography (ethyl acetate/hexane = 1:5,  $R_f=0.4$ ) to afford a yellow sticky oil in 81% yield (76 mg);  $^1\text{H}$  NMR (400 MHz,  $\text{CDCl}_3$ )  $\delta$  8.20 (t,  $J = 2.4$  Hz, 1H), 7.66 (t,  $J = 60.8$  Hz, 1H), 7.57-7.55 (dd,  $J = 7.2, 2.4$  Hz, 1H), 7.12-7.04 (m, 3H), 6.00-5.97 (m, 1H), 2.11 (s, 3H);  $^{13}\text{C}$  NMR (100 MHz,  $\text{CDCl}_3$ )  $\delta$  164.1, 147.4, 146.0, 138.3 (t,  $J = 3.6$  Hz), 131.6, 129.6, 126.0, 124.6, 119.2, 108.6 (t,  $J = 253.2$  Hz), 102.3, 17.8;  $^{19}\text{F}$  NMR (376 MHz,  $\text{CDCl}_3$ )  $\delta$  -104.4 (s, 2F); HRMS (ESI-TOF)  $m/z$ :  $[\text{M}+\text{H}]^+$  Calcd for  $\text{C}_{12}\text{H}_{11}\text{BrN}_3\text{F}_2$  314.0104; Found 314.0101.

#### ***N*-(Difluoromethyl)-*N*-(naphthalen-1-yl)pyrimidin-2-amine (product 4e)**

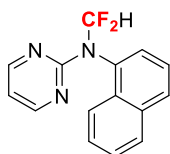

This compound was purified by column chromatography (ethyl acetate/hexane = 1:5,  $R_f=0.4$ ) to afford a yellow sticky oil in 84% yield (68 mg);  $^1\text{H}$  NMR (400 MHz,  $\text{CDCl}_3$ )  $\delta$  8.15 (t,  $J = 2.4$  Hz, 1H), 8.04-7.71 (m, 2H), 7.86 (t,  $J = 60.8$  Hz, 1H), 7.60-7.58 (m, 2H), 7.48-7.41 (m, 3H), 7.14 (d,  $J = 7.3$  Hz, 1H), 5.95-5.94 (m, 1H);  $^{13}\text{C}$  NMR (100 MHz,  $\text{CDCl}_3$ )  $\delta$  164.0, 146.6, 143.7, 138.4, 134.6, 128.7, 128.1, 126.0, 125.9, 125.2, 123.8, 123.3, 116.6, 108.8 (t,  $J = 252.8$  Hz), 102.2;  $^{19}\text{F}$  NMR (376 MHz,  $\text{CDCl}_3$ )  $\delta$  -104.2 (s, 2F); HRMS (ESI-TOF)  $m/z$ :  $[\text{M}+\text{H}]^+$  Calcd for  $\text{C}_{15}\text{H}_{12}\text{N}_3\text{F}_2$  272.0999; Found 272.0995.



# 9. <sup>1</sup>H, <sup>13</sup>C, and <sup>19</sup>F NMR spectra

## N-(5-Bromo-2-methylphenyl)pyridin-2-amine (Compound 1p)

N-(5-Bromo-2-methylphenyl)pyridin-2-amine <sup>1</sup>H

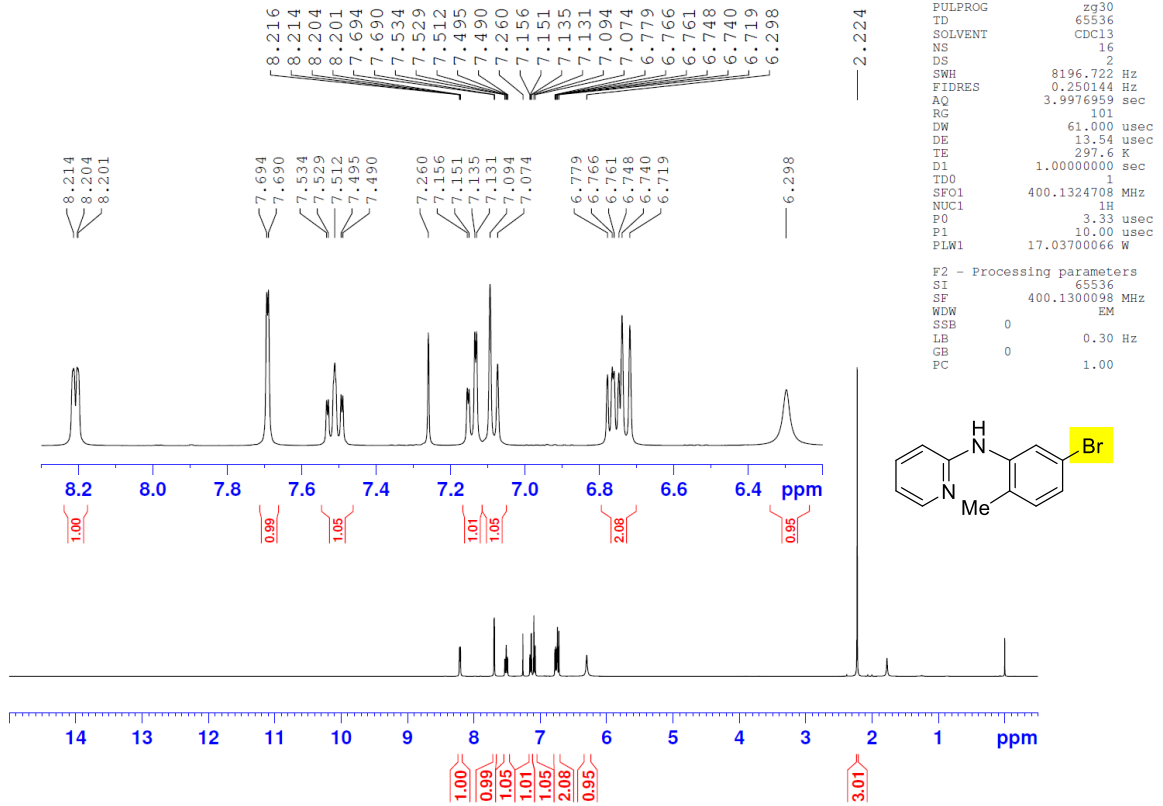

N-(5-Bromo-2-methylphenyl)pyridin-2-amine <sup>13</sup>C

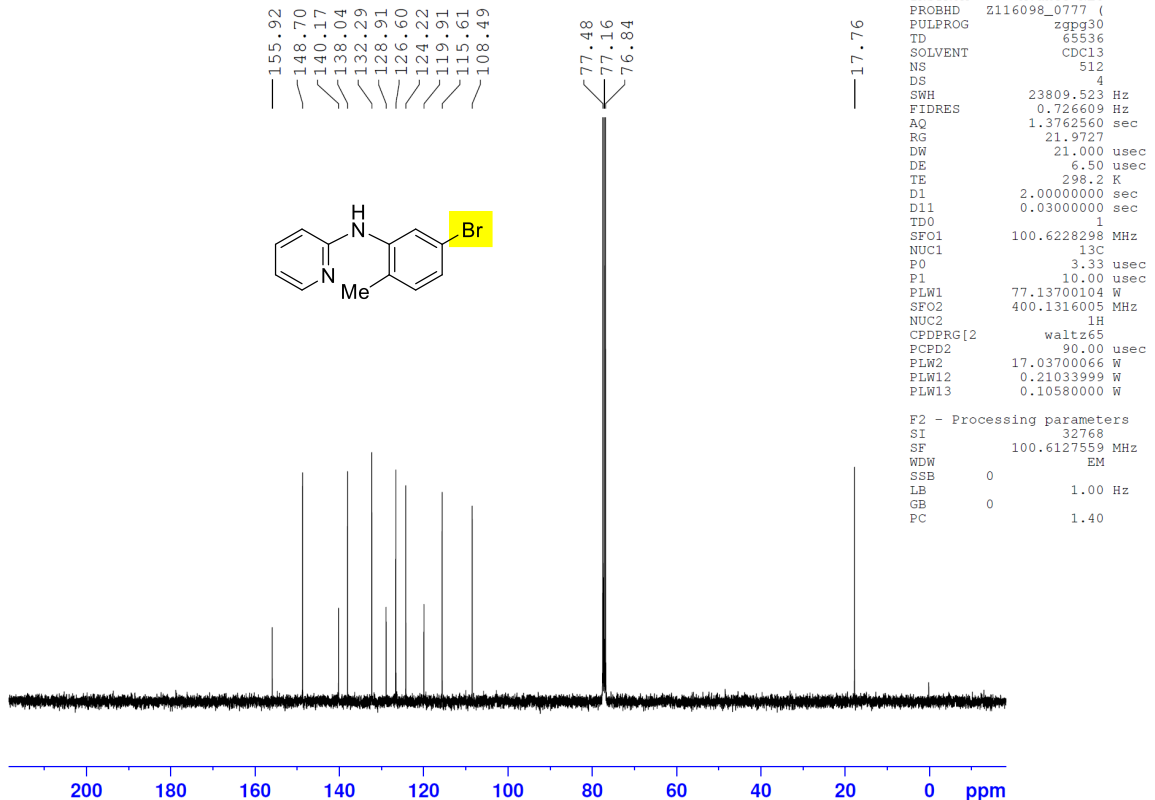

# N-(2,6-Dimethylphenyl)-6-methylpyridin-2-amine (Compound 1y)

N-(2,6-dimethylphenyl)-6-methylpyridin-2-amine 1H

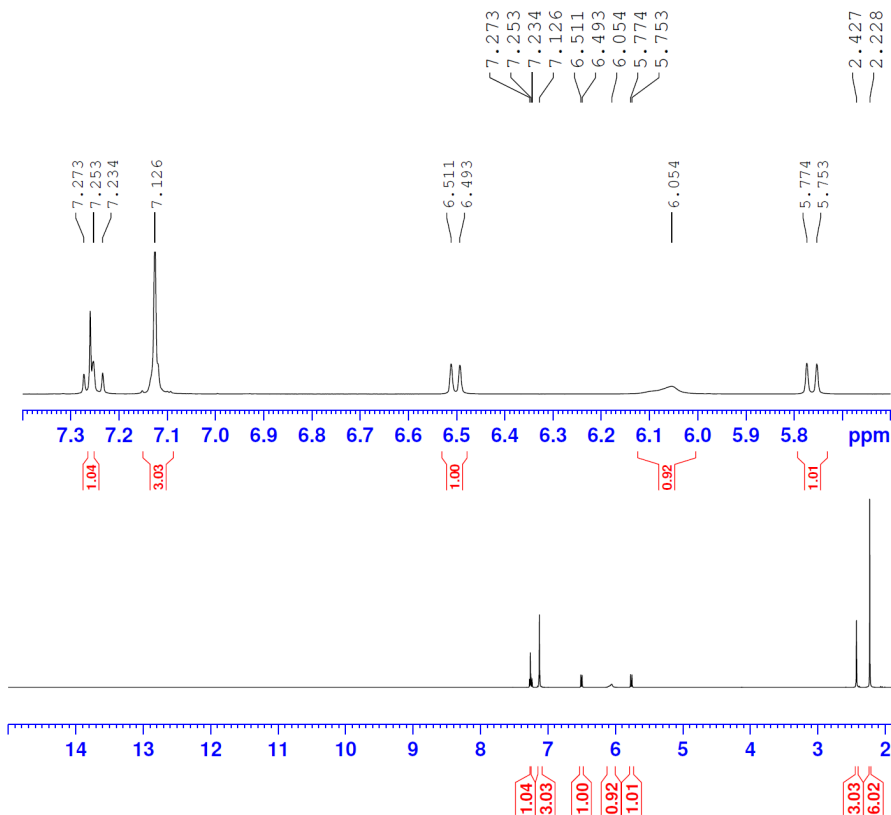

F2 - Acquisition Parameters  
 INSTRUM Avance NEO  
 PROBHD Z116098\_0777 ( )  
 PULPROG zg30  
 TD 65536  
 SOLVENT CDCl3  
 NS 16  
 DS 2  
 SWH 8196.722 Hz  
 FIDRES 0.250144 Hz  
 AQ 3.9976959 sec  
 RG 101  
 DW 61.000 usec  
 DE 13.54 usec  
 TE 297.5 K  
 D1 1.00000000 sec  
 TD0 1  
 SFO1 400.1324708 MHz  
 NUC1 1H  
 P0 3.33 usec  
 P1 10.00 usec  
 PLW1 17.03700066 W

F2 - Processing parameters  
 SI 65536  
 SF 400.1300099 MHz  
 WDW EM  
 SSB 0  
 LB 0.30 Hz  
 GB 0  
 PC 1.00

N-(2,6-dimethylphenyl)-6-methylpyridin-2-amine 13C

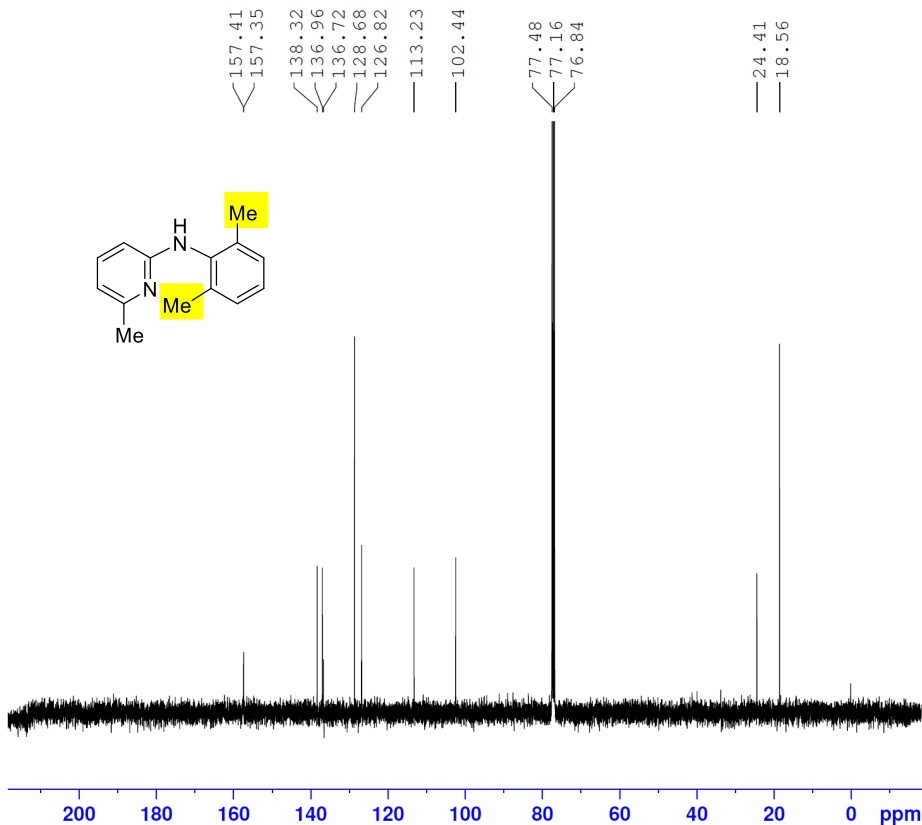

F2 - Acquisition Parameters  
 INSTRUM Avance NEO  
 PROBHD Z116098\_0777 ( )  
 PULPROG zgpg30  
 TD 65536  
 SOLVENT CDCl3  
 NS 512  
 DS 4  
 SWH 23809.523 Hz  
 FIDRES 0.726609 Hz  
 AQ 1.3762560 sec  
 RG 27.0433  
 DW 21.000 usec  
 DE 6.50 usec  
 TE 298.1 K  
 D1 2.00000000 sec  
 D11 0.03000000 sec  
 TD0 1  
 SFO1 100.6228298 MHz  
 NUC1 13C  
 P0 3.33 usec  
 P1 10.00 usec  
 PLW1 77.13700104 W  
 SFO2 400.1316005 MHz  
 NUC2 1H  
 CPDPRG[2] waltz65  
 PCPD2 90.00 usec  
 PLW2 17.03700066 W  
 PLW12 0.21033999 W  
 PLW13 0.10580000 W

F2 - Processing parameters  
 SI 32768  
 SF 100.6127547 MHz  
 WDW EM  
 SSB 0  
 LB 1.00 Hz  
 GB 0  
 PC 1.40

# N-(5-Bromo-2-methylphenyl)pyrimidin-2-amine (Compound 3d)

N-(5-Bromo-2-methylphenyl)pyrimidin-2-amine 1H

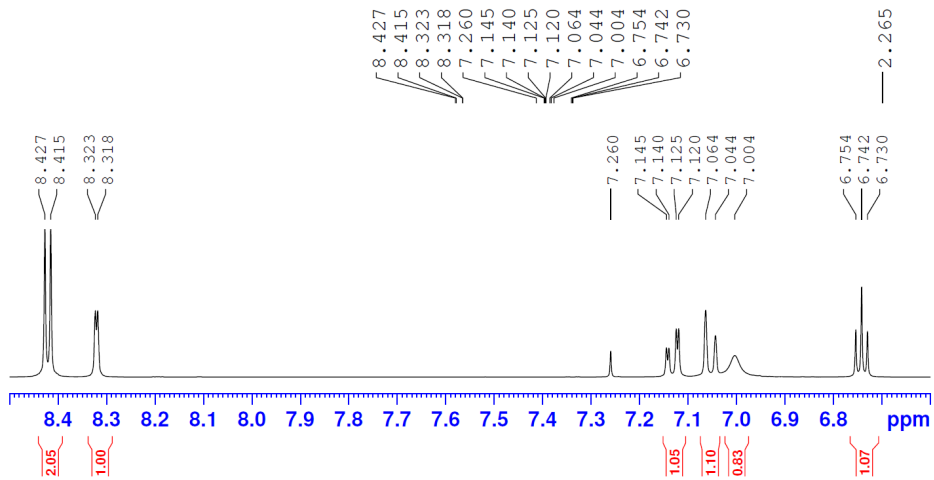

F2 - Acquisition Parameters  
 INSTRUM Avance NEO  
 PROBHD Z116098\_0777 ( )  
 PULPROG zg30  
 TD 65536  
 SOLVENT CDCl3  
 NS 16  
 DS 2  
 SWH 8196.722 Hz  
 FIDRES 0.250144 Hz  
 AQ 3.9976959 sec  
 RG 101  
 DW 61.000 usec  
 DE 13.54 usec  
 TE 297.6 K  
 D1 1.00000000 sec  
 TD0 1  
 SFO1 400.1324708 MHz  
 NUC1 1H  
 P0 3.33 usec  
 P1 10.00 usec  
 PLW1 17.03700066 W

F2 - Processing parameters  
 SI 65536  
 SF 400.130098 MHz  
 WDW EM  
 SSB 0  
 LB 0.30 Hz  
 GB 0  
 PC 1.00

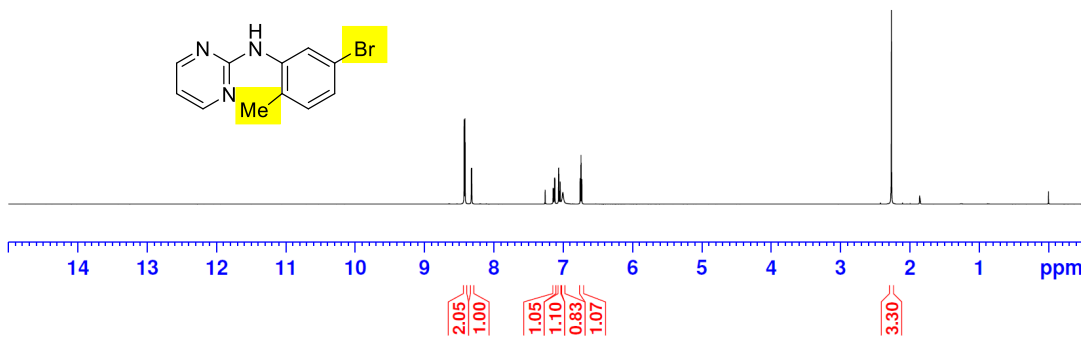

N-(5-Bromo-2-methylphenyl)pyrimidin-2-amine 13C

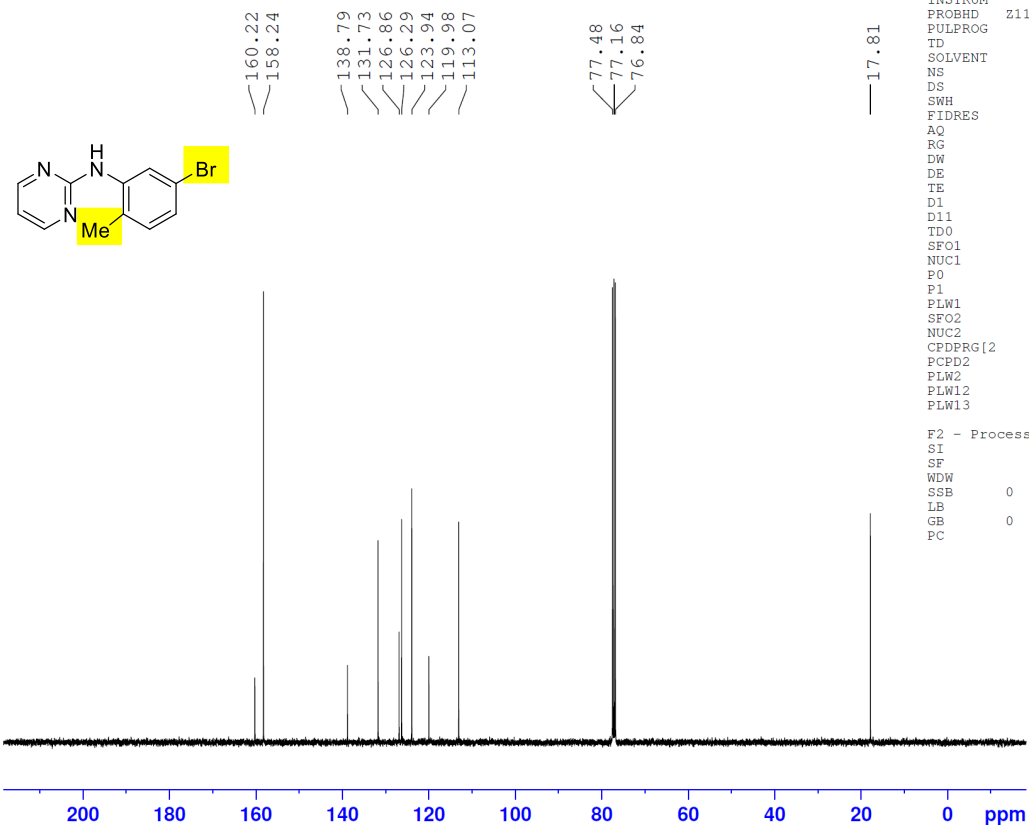

F2 - Acquisition Parameters  
 INSTRUM Avance NEO  
 PROBHD Z116098\_0777 ( )  
 PULPROG zgpg30  
 TD 65536  
 SOLVENT CDCl3  
 NS 512  
 DS 4  
 SWH 23809.523 Hz  
 FIDRES 0.726609 Hz  
 AQ 1.3762560 sec  
 RG 19.5313  
 DW 21.000 usec  
 DE 6.50 usec  
 TE 298.2 K  
 D1 2.00000000 sec  
 D11 0.03000000 sec  
 TD0 1  
 SFO1 100.6228298 MHz  
 NUC1 13C  
 P0 3.33 usec  
 P1 10.00 usec  
 PLW1 77.13700104 W  
 SFO2 400.1316005 MHz  
 NUC2 1H  
 CPDPRG[2] waltz65  
 PCPD2 90.00 usec  
 PLW2 17.03700066 W  
 PLW12 0.21033999 W  
 PLW13 0.10580000 W

F2 - Processing parameters  
 SI 32768  
 SF 100.6127582 MHz  
 WDW EM  
 SSB 0  
 LB 1.00 Hz  
 GB 0  
 PC 1.40

# N-(Difluoromethyl)-N-phenylpyridin-2-amine (Product 2a)

N-(Difluoromethyl)-N-phenylpyridin-2-amine 1H

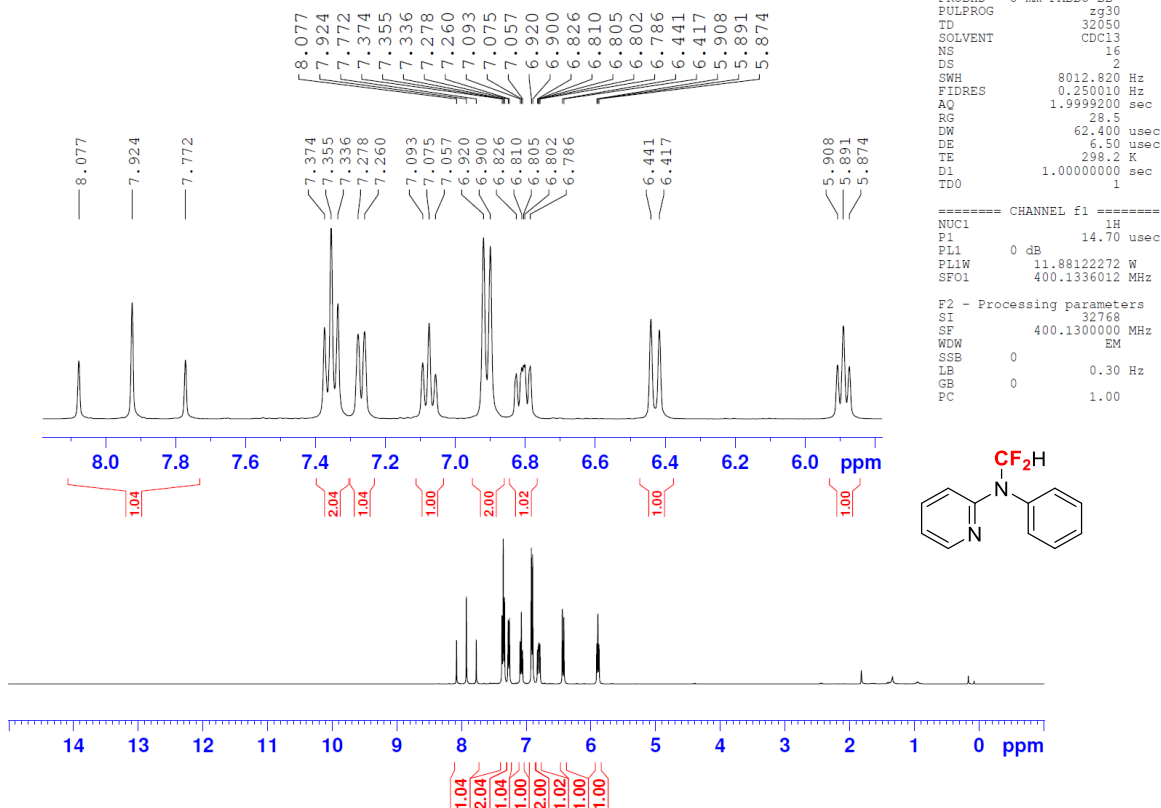

N-(Difluoromethyl)-N-phenylpyridin-2-amine 13C

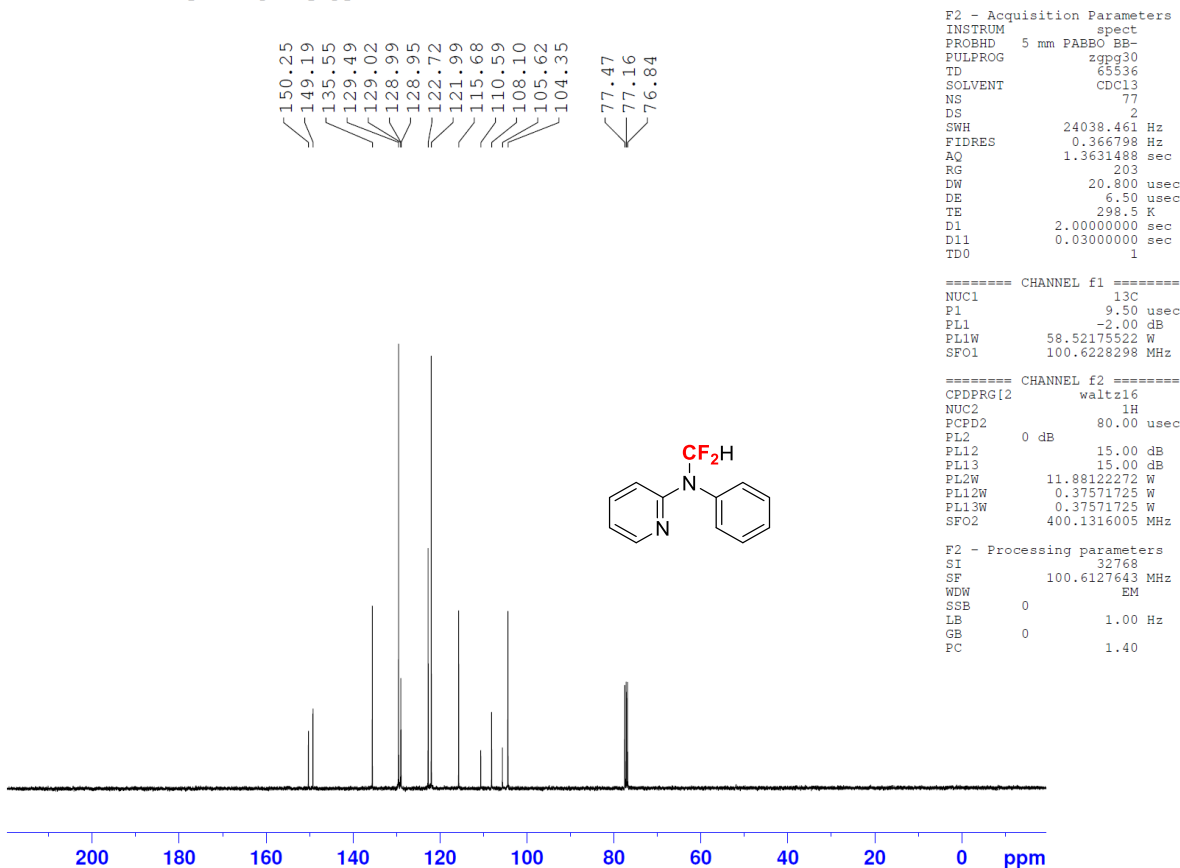

N-(Difluoromethyl)-N-phenylpyridin-2-amine 19F

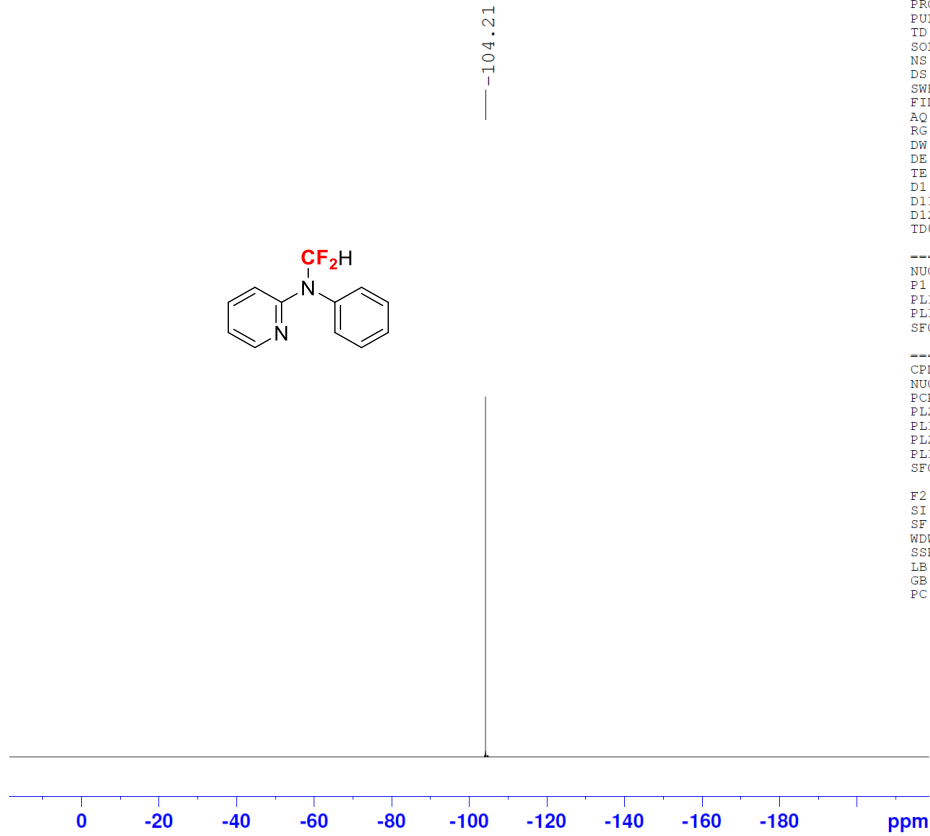

F2 - Acquisition Parameters  
 INSTRUM spect  
 PROBHD 5 mm PABBO BB-  
 PULPROG zgfhigqn  
 TD 131072  
 SOLVENT CDC13  
 NS 16  
 DS 4  
 SWH 89285.711 Hz  
 FIDRES 0.681196 Hz  
 AQ 0.7340032 sec  
 RG 512  
 DW 5.600 usec  
 DE 6.50 usec  
 TE 298.6 K  
 D1 1.00000000 sec  
 D11 0.03000000 sec  
 D12 0.00002000 sec  
 TDO 1

----- CHANNEL f1 -----  
 NUC1 19F  
 P1 14.20 usec  
 PL1 -3.00 dB  
 PL1W 18.69428444 W  
 SFO1 376.4607164 MHz

----- CHANNEL f2 -----  
 CPDPRG[2] waltz16  
 NUC2 1H  
 PCPD2 80.00 usec  
 PL2 0 dB  
 PL12 15.00 dB  
 PL2W 11.88122272 W  
 FL12W 0.37571725 W  
 SFO2 400.1316005 MHz

F2 - Processing parameters  
 SI 65536  
 SF 376.4983660 MHz  
 WDW EM  
 SSB 0  
 LB 0 0.30 Hz  
 GB 0  
 PC 1.00

N-(4-Chlorophenyl)-N-(difluoromethyl)pyridin-2-amine (product 2b)

N-(4-Chlorophenyl)-N-(difluoromethyl)pyridin-2-amine 1H

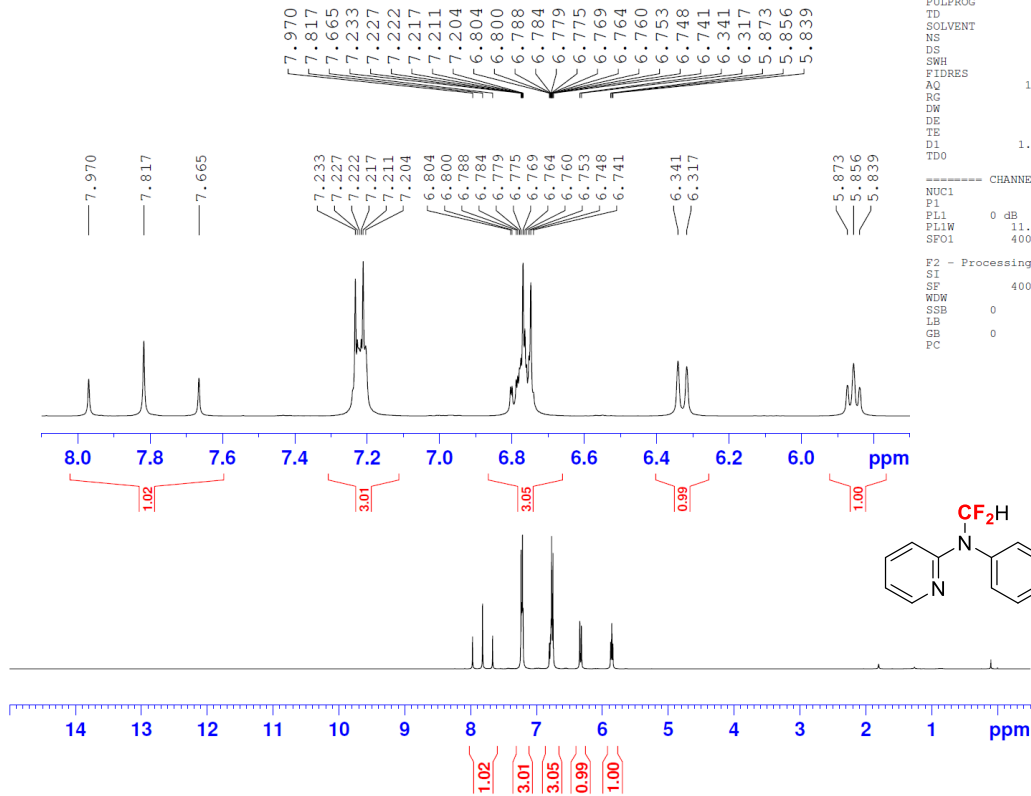

F2 - Acquisition Parameters  
 INSTRUM spect  
 PROBHD 5 mm PABBO BB-  
 PULPROG zg30  
 TD 16384  
 SOLVENT CDC13  
 NS 16  
 DS 2  
 SWH 8012.820 Hz  
 FIDRES 0.489064 Hz  
 AQ 1.0223616 sec  
 RG 25.4  
 DW 62.400 usec  
 DE 6.50 usec  
 TE 299.1 K  
 D1 1.00000000 sec  
 TDO 1

----- CHANNEL f1 -----  
 NUC1 1H  
 P1 14.70 usec  
 PL1 0 dB  
 PL1W 11.88122272 W  
 SFO1 400.1336012 MHz

F2 - Processing parameters  
 SI 32768  
 SF 400.1300232 MHz  
 WDW EM  
 SSB 0  
 LB 0 0.30 Hz  
 GB 0  
 PC 1.00

N-(4-Chlorophenyl)-N-(difluoromethyl)pyridin-2-amine 13C

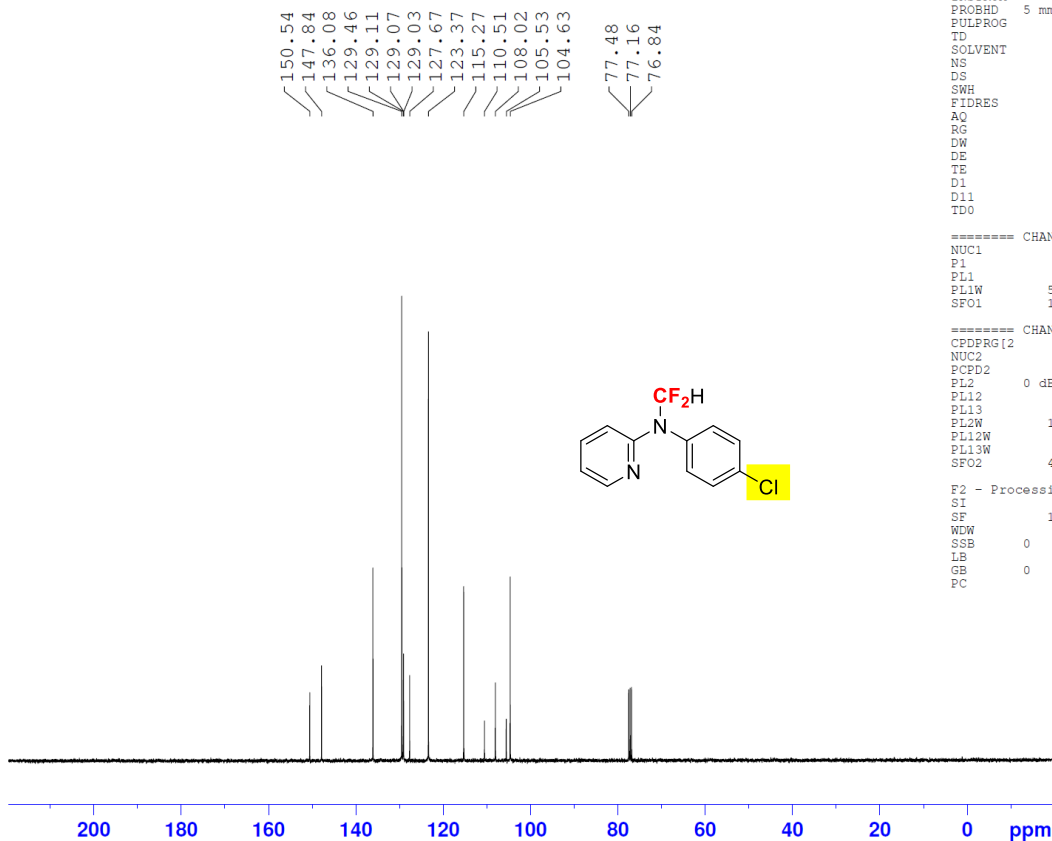

F2 - Acquisition Parameters  
INSTRUM spect  
PROBHD 5 mm PABBO BB-  
PULPROG zgpg30  
TD 65536  
SOLVENT CDCl3  
NS 45  
DS 2  
SWH 24038.461 Hz  
FIDRES 0.366798 Hz  
AQ 1.3631488 sec  
RG 181  
DW 20.800 usec  
DE 6.50 usec  
TE 300.0 K  
D1 2.00000000 sec  
D11 0.03000000 sec  
TD0 1

===== CHANNEL f1 =====  
NUC1 13C  
P1 9.50 usec  
PL1 -2.00 dB  
PL1W 58.52175522 W  
SFO1 100.6228298 MHz

===== CHANNEL f2 =====  
CPDPRG2 waltz16  
NUC2 1H  
PCPD2 80.00 usec  
PL2 0 dB  
PL12 15.00 dB  
PL13 15.00 dB  
PL2W 11.88122272 W  
PL12W 0.37571725 W  
PL13W 0.37571725 W  
SFO2 400.1316005 MHz

F2 - Processing parameters  
SI 32768  
SF 100.6127654 MHz  
WDW EM  
SSB 0  
LB 1.00 Hz  
GB 0  
PC 1.40

N-(4-Chlorophenyl)-N-(difluoromethyl)pyridin-2-amine 19F

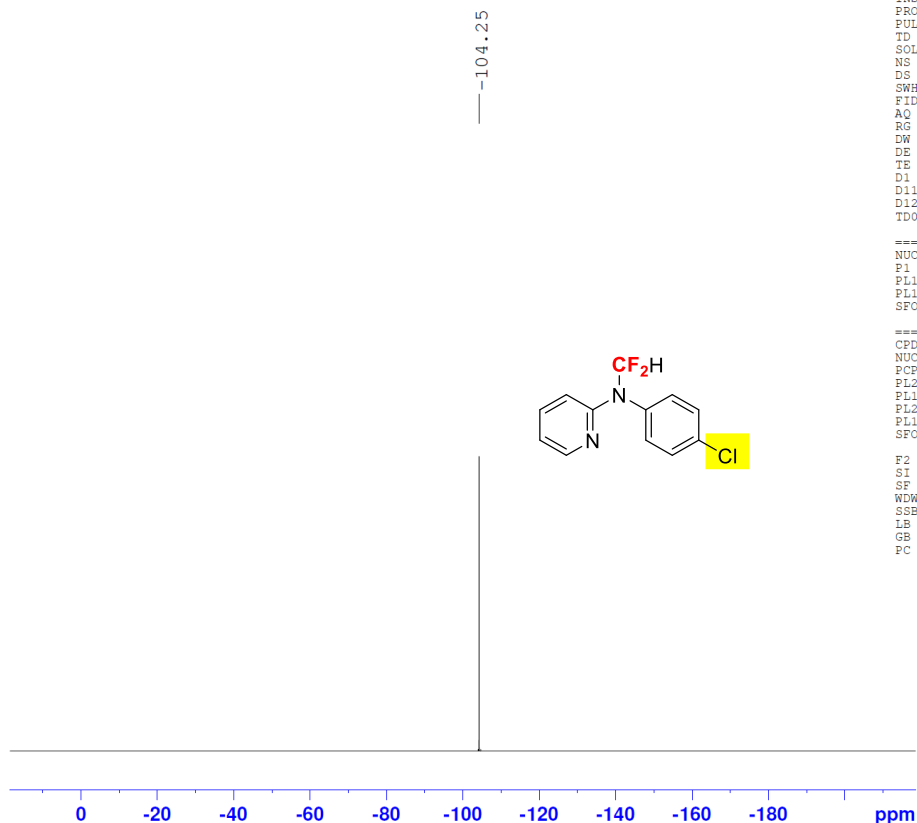

F2 - Acquisition Parameters  
INSTRUM spect  
PROBHD 5 mm PABBO BB-  
PULPROG zgfhigpn  
TD 131072  
SOLVENT CDCl3  
NS 16  
DS 4  
SWH 89285.711 Hz  
FIDRES 0.681196 Hz  
AQ 0.7340032 sec  
RG 406  
DW 5.600 usec  
DE 6.50 usec  
TE 299.5 K  
D1 1.00000000 sec  
D11 0.03000000 sec  
D12 0.00002000 sec  
TD0 1

===== CHANNEL f1 =====  
NUC1 19F  
P1 14.20 usec  
PL1 -3.00 dB  
PL1W 18.69428444 W  
SFO1 376.4607164 MHz

===== CHANNEL f2 =====  
CPDPRG2 waltz16  
NUC2 1H  
PCPD2 80.00 usec  
PL2 0 dB  
PL12 15.00 dB  
PL2W 11.88122272 W  
PL12W 0.37571725 W  
SFO2 400.1316005 MHz

F2 - Processing parameters  
SI 65536  
SF 376.4983660 MHz  
WDW EM  
SSB 0  
LB 0.30 Hz  
GB 0  
PC 1.00

# N-(Difluoromethyl)-N-(4-fluorophenyl)pyridin-2-amine (product 2c)

N-(Difluoromethyl)-N-(4-fluorophenyl)pyridin-2-amine 1H

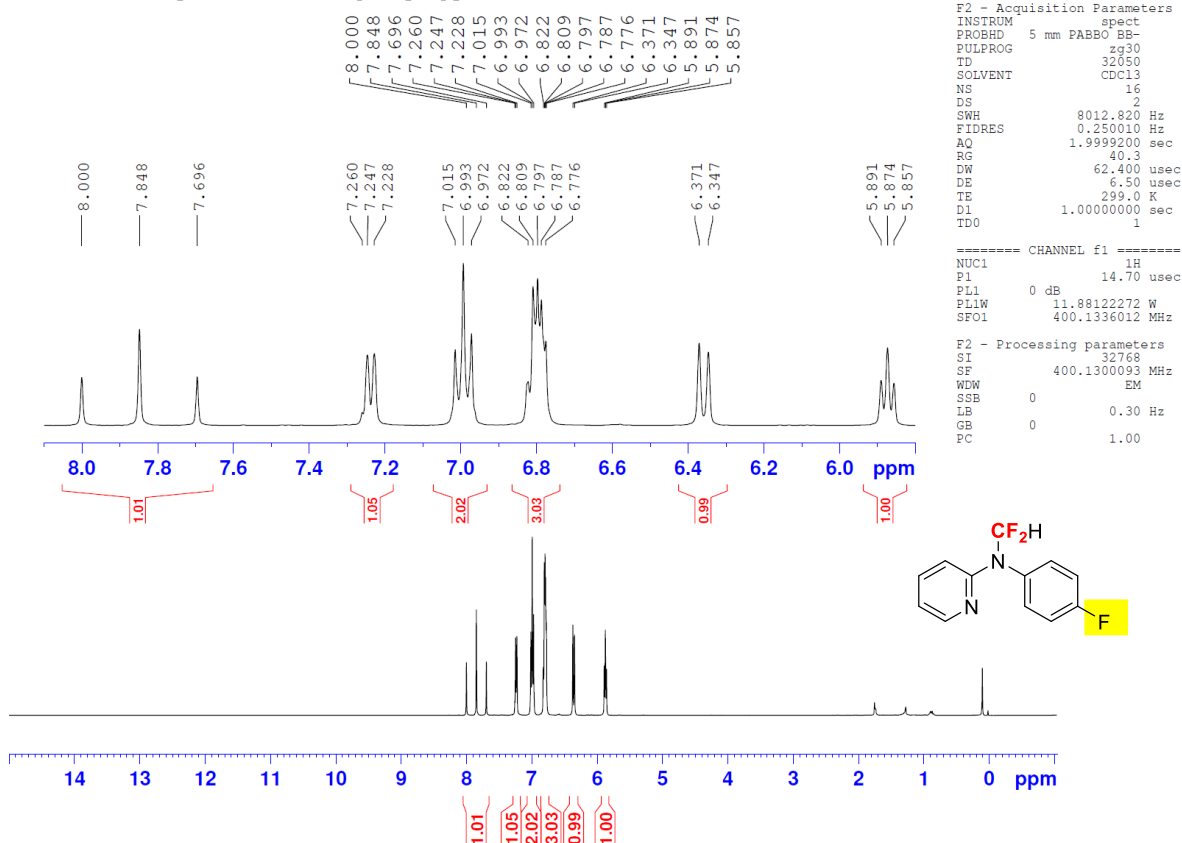

N-(Difluoromethyl)-N-(4-fluorophenyl)pyridin-2-amine 13C

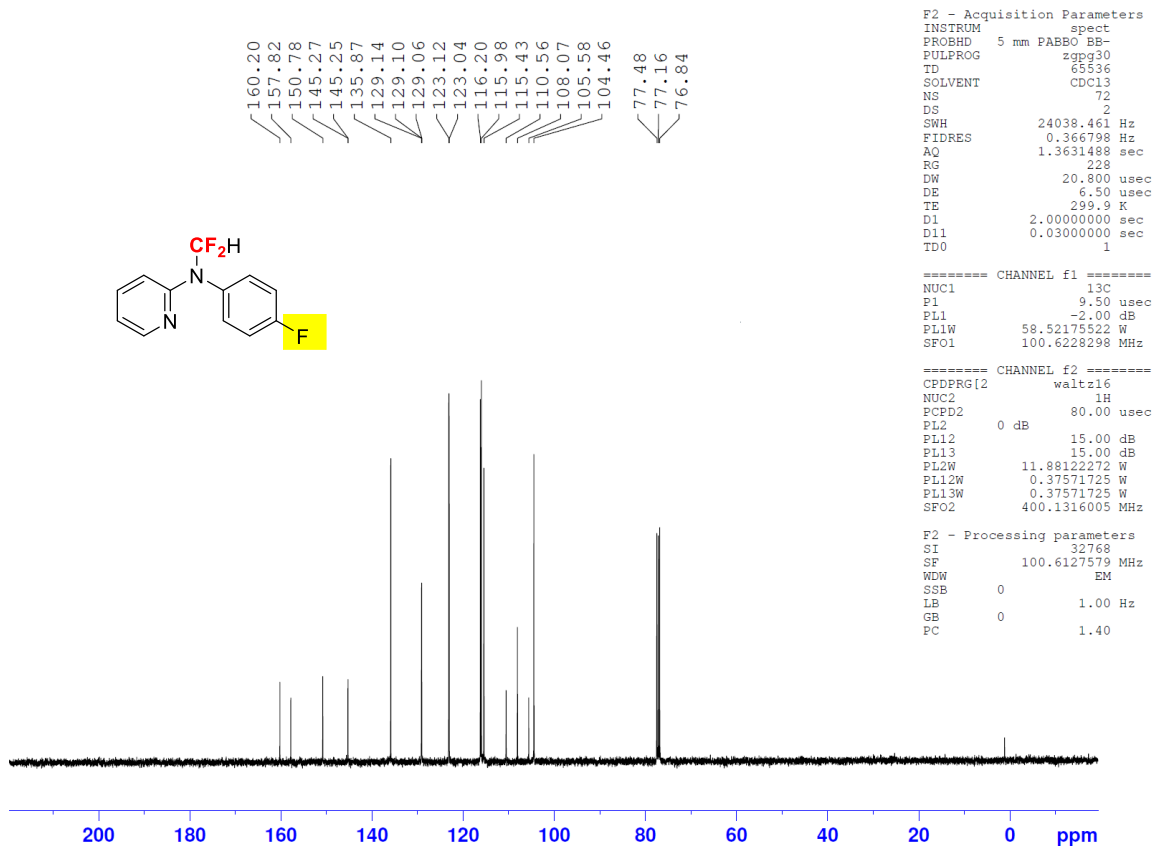

N-(Difluoromethyl)-N-(4-fluorophenyl)pyridin-2-amine 19F

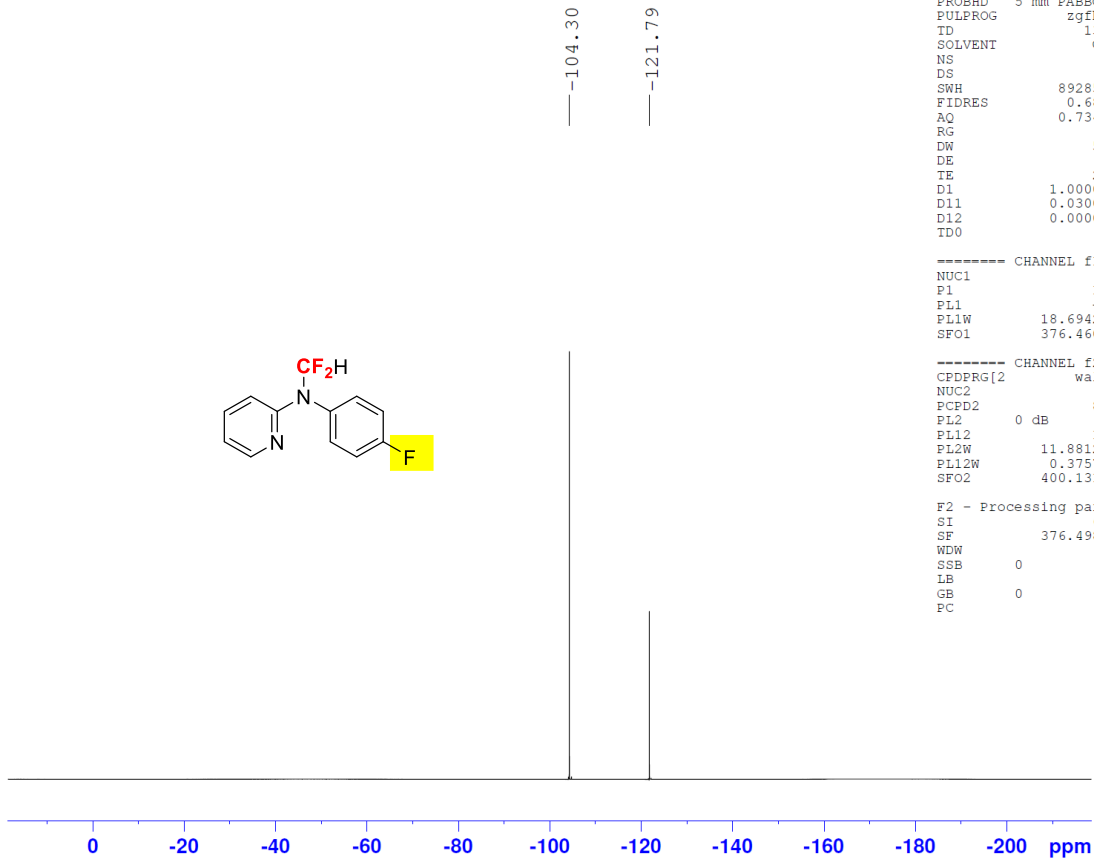

F2 - Acquisition Parameters  
 INSTRUM spect  
 PROBHD 5 mm PABBO BB-  
 PULPROG zgfhigqn  
 TD 131072  
 SOLVENT CDCl3  
 NS 16  
 DS 4  
 SWH 89285.711 Hz  
 FIDRES 0.681196 Hz  
 AQ 0.7340032 sec  
 RG 645  
 DW 5.600 usec  
 DE 6.50 usec  
 TE 298.3 K  
 D1 1.00000000 sec  
 D11 0.03000000 sec  
 D12 0.00002000 sec  
 TDO 1

----- CHANNEL f1 -----  
 NUC1 19F  
 P1 14.20 usec  
 PL1 -3.00 dB  
 PL1W 18.69428444 W  
 SFO1 376.4607164 MHz

----- CHANNEL f2 -----  
 CPDPRG2 waltz16  
 NUC2 1H  
 PCPD2 80.00 usec  
 PL2 0 dB  
 PL12 15.00 dB  
 PL2W 11.88122272 W  
 PL12W 0.37571725 W  
 SFO2 400.1316005 MHz

F2 - Processing parameters  
 SI 65336  
 SF 376.4903660 MHz  
 WDW EM  
 SSB 0  
 LB 0.30 Hz  
 GB 0  
 PC 1.00

4-((Difluoromethyl)(pyridin-2-yl)amino)benzotrile (product 2d)

4-((Difluoromethyl)(pyridin-2-yl)amino)benzotrile 1H

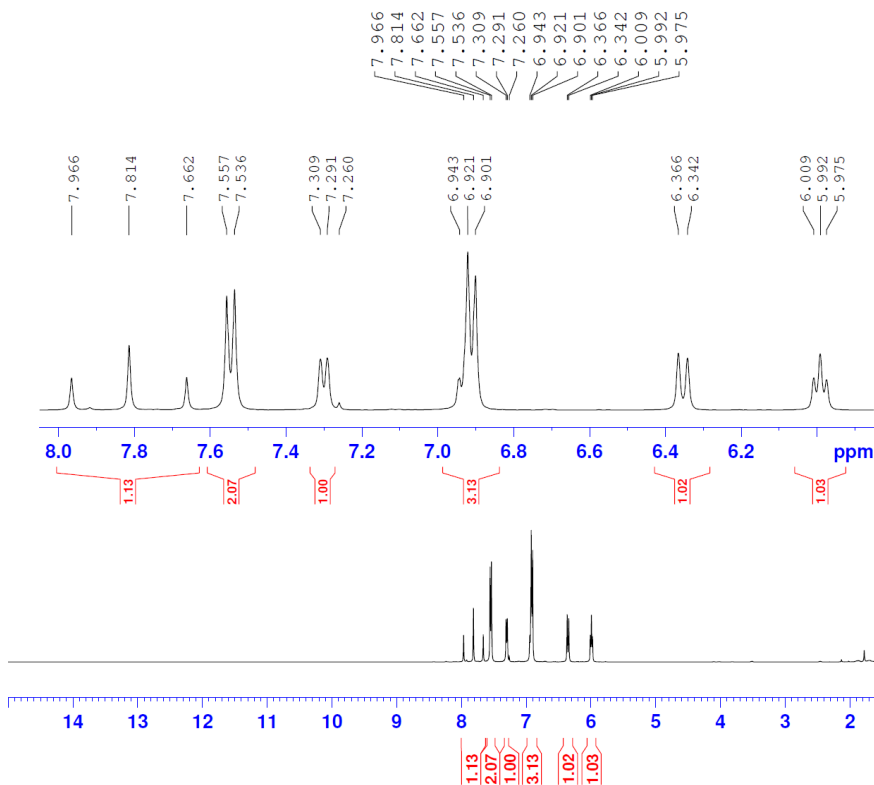

F2 - Acquisition Parameters  
 INSTRUM spect  
 PROBHD 5 mm PABBO BB-  
 PULPROG zg30  
 TD 32050  
 SOLVENT CDCl3  
 NS 16  
 DS 2  
 SWH 8012.820 Hz  
 FIDRES 0.250010 Hz  
 AQ 1.9999200 sec  
 RG 40.3  
 DW 62.400 usec  
 DE 6.50 usec  
 TE 298.0 K  
 D1 1.00000000 sec  
 TDO 1

===== CHANNEL f1 =====  
 NUC1 1H  
 P1 14.70 usec  
 PL1 0 dB  
 PL1W 11.88122272 W  
 SFO1 400.1336012 MHz

F2 - Processing parameters  
 SI 32768  
 SF 400.1300089 MHz  
 WDW EM  
 SSB 0  
 LB 0.30 Hz  
 GB 0  
 PC 1.00



4-((Difluoromethyl) (pyridin-2-yl) amino)benzonitrile 13C

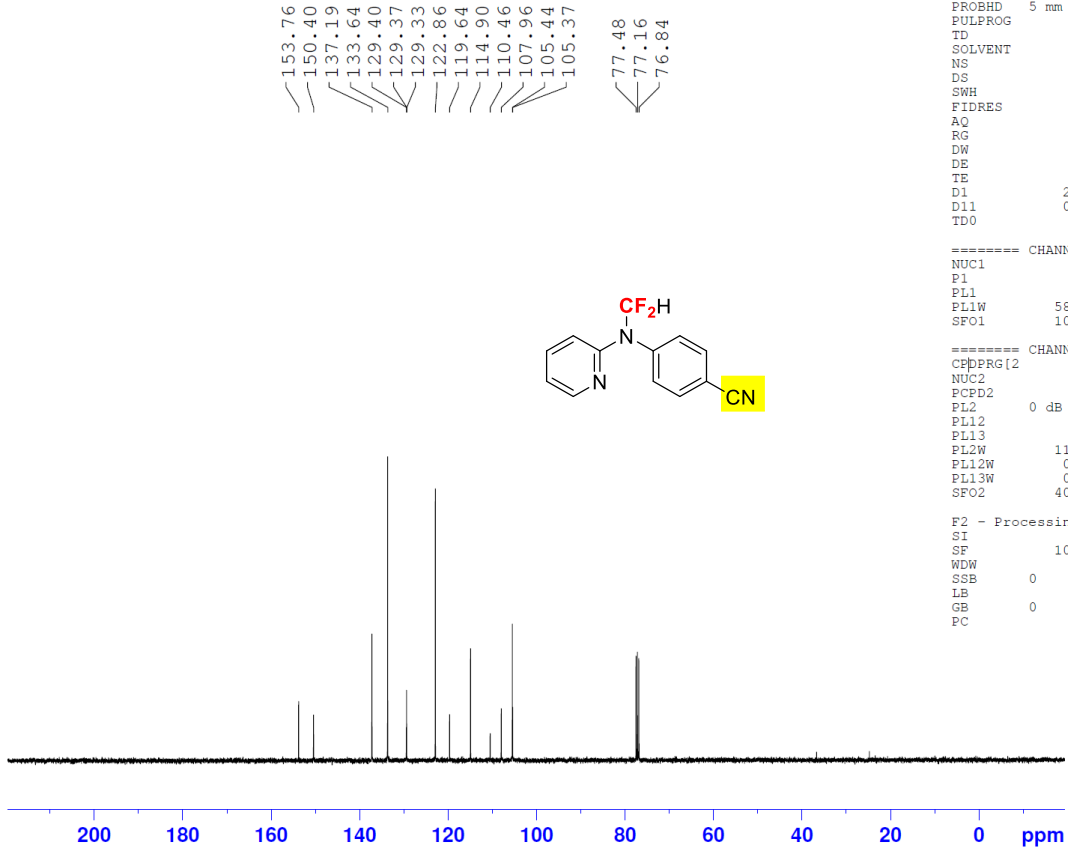

```
F2 - Acquisition Parameters
INSTRUM spect
PROBHD 5 mm PABBO BB-
PULPROG zgpg30
TD 65536
SOLVENT CDCl3
NS 35
DS 2
SWH 24038.461 Hz
FIDRES 0.366798 Hz
AQ 1.3631488 sec
RG 181
DW 20.800 usec
DE 6.50 usec
TE 298.7 K
D1 2.00000000 sec
D11 0.03000000 sec
TD0 1
```

```
===== CHANNEL f1 =====
NUC1 13C
P1 9.50 usec
PL1 -2.00 dB
PL1W 58.52175522 W
SFO1 100.6228298 MHz
```

```
===== CHANNEL f2 =====
CPDPRG[2] waltz16
NUC2 1H
PCPD2 80.00 usec
PL2 0 dB
PL12 15.00 dB
PL13 15.00 dB
PL2W 11.88122272 W
PL12W 0.37571725 W
PL13W 0.37571725 W
SFO2 400.1316005 MHz
```

```
F2 - Processing parameters
SI 32768
SF 100.6127649 MHz
WDW EM
SSB 0
LB 1.00 Hz
GB 0
PC 1.40
```

4-((Difluoromethyl) (pyridin-2-yl) amino)benzonitrile 19F

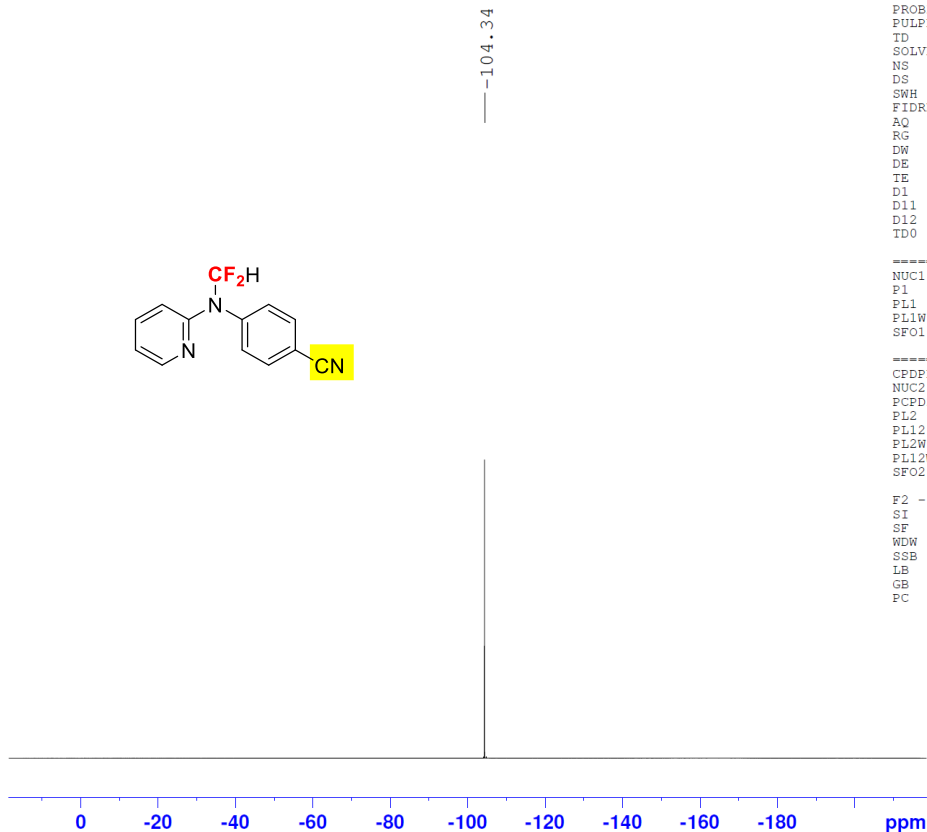

```
F2 - Acquisition Parameters
INSTRUM spect
PROBHD 5 mm PABBO BB-
PULPROG zgfhggn
TD 131072
SOLVENT CDCl3
NS 16
DS 4
SWH 89285.711 Hz
FIDRES 0.681196 Hz
AQ 0.7340032 sec
RG 724
DW 5.600 usec
DE 6.50 usec
TE 298.1 K
D1 1.00000000 sec
D11 0.03000000 sec
D12 0.00002000 sec
TD0 1
```

```
===== CHANNEL f1 =====
NUC1 19F
P1 14.20 usec
PL1 -3.00 dB
PL1W 18.69428444 W
SFO1 376.4607164 MHz
```

```
===== CHANNEL f2 =====
CPDPRG[2] waltz16
NUC2 1H
PCPD2 80.00 usec
PL2 0 dB
PL12 15.00 dB
PL13 15.00 dB
PL2W 11.88122272 W
PL12W 0.37571725 W
PL13W 0.37571725 W
SFO2 400.1316005 MHz
```

```
F2 - Processing parameters
SI 65536
SF 376.4983660 MHz
WDW EM
SSB 0
LB 0.30 Hz
GB 0
PC 1.00
```

### 3-((Difluoromethyl)(pyridin-2-yl)amino)benzonitrile (product 2e)

3-((Difluoromethyl)(pyridin-2-yl)amino)benzonitrile 1H

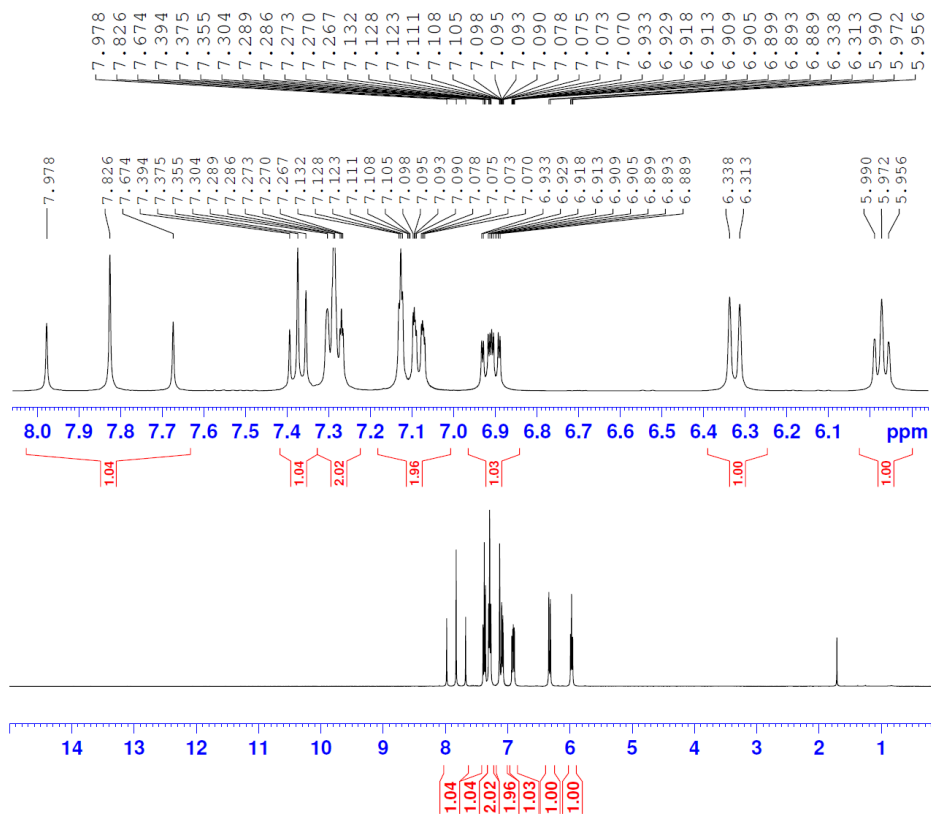

F2 - Acquisition Parameters  
 INSTRUM spect  
 PROBHD 5 mm PABBO BB-  
 PULPROG zg30  
 TD 16384  
 SOLVENT CDCl3  
 NS 16  
 DS 2  
 SWH 8012.820 Hz  
 FIDRES 0.489064 Hz  
 AQ 1.0223616 sec  
 RG 57  
 DW 62.400 usec  
 DE 6.50 usec  
 TE 299.3 K  
 D1 1.00000000 sec  
 TDO 1

===== CHANNEL f1 =====  
 NUC1 1H  
 P1 14.70 usec  
 PL1 0 dB  
 PL1W 11.88122272 W  
 SFO1 400.1336012 MHz

F2 - Processing parameters  
 SI 32768  
 SF 400.1300070 MHz  
 WDW EM  
 SSB 0  
 LB 0.30 Hz  
 GB 0  
 PC 1.00

3-((Difluoromethyl)(pyridin-2-yl)amino)benzonitrile 13C

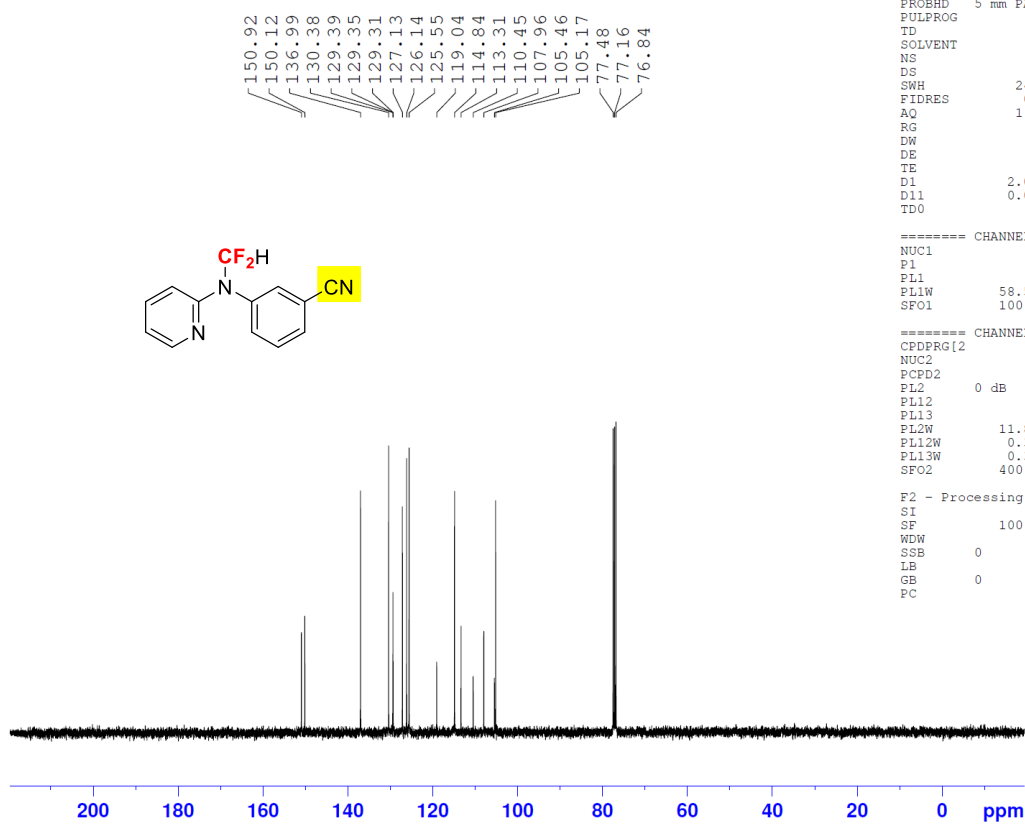

F2 - Acquisition Parameters  
 INSTRUM spect  
 PROBHD 5 mm PABBO BB-  
 PULPROG zgpg30  
 TD 65536  
 SOLVENT CDCl3  
 NS 51  
 DS 2  
 SWH 24038.461 Hz  
 FIDRES 0.366798 Hz  
 AQ 1.3631488 sec  
 RG 228  
 DW 20.800 usec  
 DE 6.50 usec  
 TE 299.9 K  
 D1 2.00000000 sec  
 D11 0.03000000 sec  
 TDO 1

===== CHANNEL f1 =====  
 NUC1 13C  
 P1 9.50 usec  
 PL1 -2.00 dB  
 PL1W 58.52175522 W  
 SFO1 100.6228298 MHz

===== CHANNEL f2 =====  
 CPDPRG2 waltz16  
 NUC2 1H  
 PCPD2 80.00 usec  
 PL2 0 dB  
 PL12 15.00 dB  
 PL13 15.00 dB  
 PL2W 11.88122272 W  
 PL12W 0.37571725 W  
 PL13W 0.37571725 W  
 SFO2 400.1316005 MHz

F2 - Processing parameters  
 SI 32768  
 SF 100.6127617 MHz  
 WDW EM  
 SSB 0  
 LB 1.00 Hz  
 GB 0  
 PC 1.40

3-((Difluoromethyl) (pyridin-2-yl)amino)benzonitrile 19F

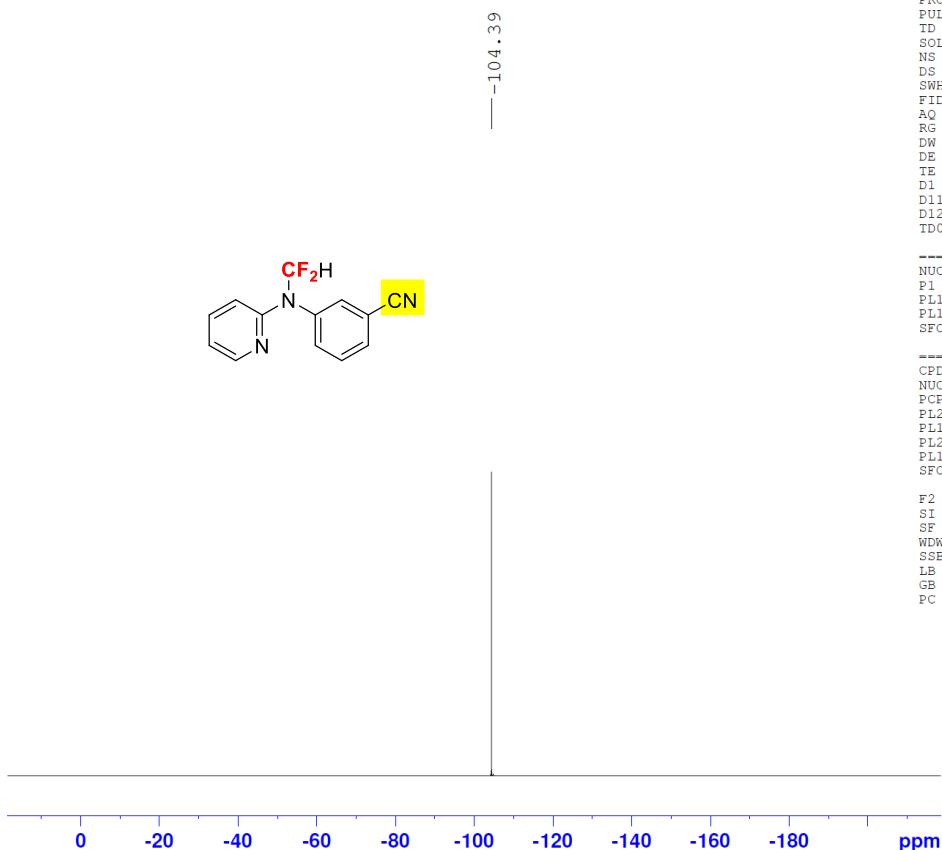

F2 - Acquisition Parameters  
 INSTRUM spect  
 PROBHD 5 mm PABBO BB-  
 PULPROG zgfhigpn  
 TD 131072  
 SOLVENT CDCl3  
 NS 16  
 DS 4  
 SWH 89285.711 Hz  
 FIDRES 0.681196 Hz  
 AQ 0.7340032 sec  
 RG 812  
 DW 5.600 usec  
 DE 6.50 usec  
 TE 299.6 K  
 D1 1.00000000 sec  
 D11 0.03000000 sec  
 D12 0.00002000 sec  
 TDO 1

CHANNEL f1  
 NUC1 19F  
 P1 14.20 usec  
 PL1 -3.00 dB  
 PL1W 18.69428444 W  
 SFO1 376.4607164 MHz

CHANNEL f2  
 CPDPRG[2] waltz16  
 NUC2 1H  
 P1 80.00 usec  
 PL2 0 dB  
 PL12 15.00 dB  
 PL2W 11.88122272 W  
 PL12W 0.37571725 W  
 SFO2 400.1316005 MHz

F2 - Processing parameters  
 SI 6536  
 SF 376.4983660 MHz  
 WDW EM  
 SSB 0  
 LB 0.30 Hz  
 GB 0  
 PC 1.00

N-(3-Bromophenyl)-N-(difluoromethyl)pyridin-2-amine (product 2f)

N-(3-Bromophenyl)-N-(difluoromethyl)pyridin-2-amine 1H

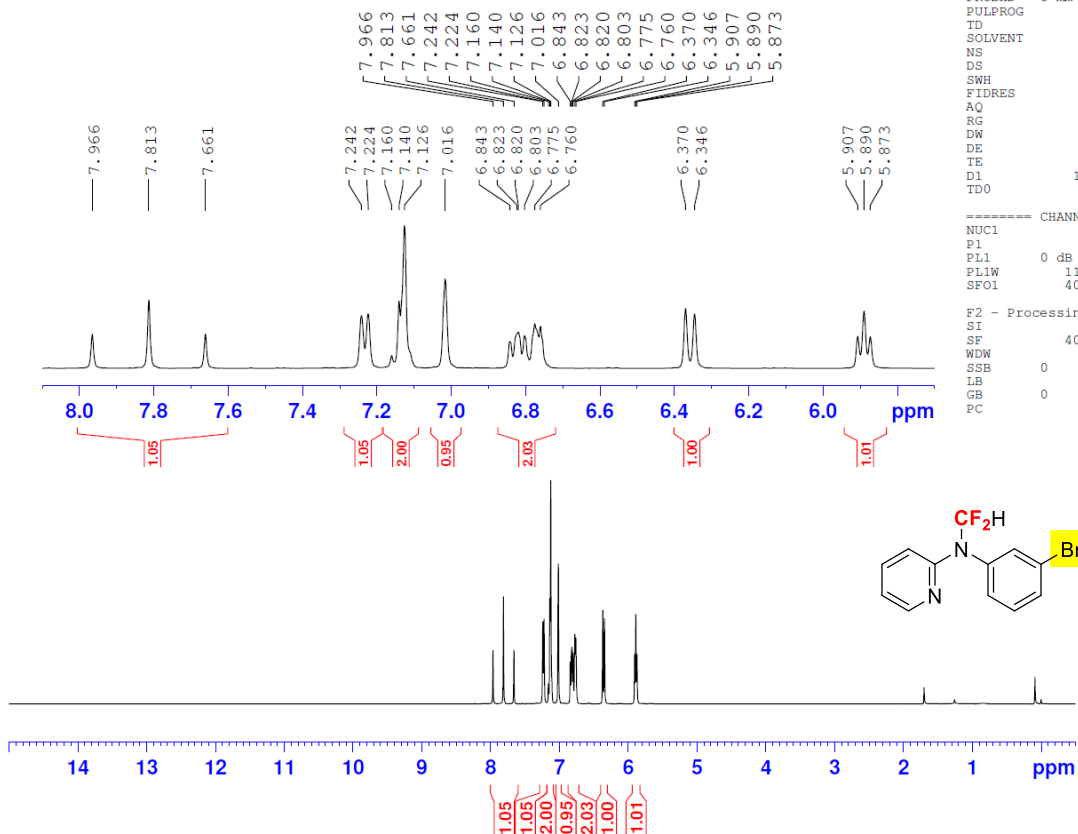

F2 - Acquisition Parameters  
 INSTRUM spect  
 PROBHD 5 mm PABBO BB-  
 PULPROG zg30  
 TD 32050  
 SOLVENT CDCl3  
 NS 16  
 DS 2  
 SWH 8012.820 Hz  
 FIDRES 0.250010 Hz  
 AQ 1.9999200 sec  
 RG 32  
 DW 62.400 usec  
 DE 6.50 usec  
 TE 298.1 K  
 D1 1.00000000 sec  
 TDO 1

CHANNEL f1  
 NUC1 1H  
 P1 14.70 usec  
 PL1 0 dB  
 PL1W 11.88122272 W  
 SFO1 400.1336012 MHz

F2 - Processing parameters  
 SI 32768  
 SF 400.1300186 MHz  
 WDW EM  
 SSB 0  
 LB 0.30 Hz  
 GB 0  
 PC 1.00

N-(3-Bromophenyl)-N-(difluoromethyl)pyridin-2-amine 13C

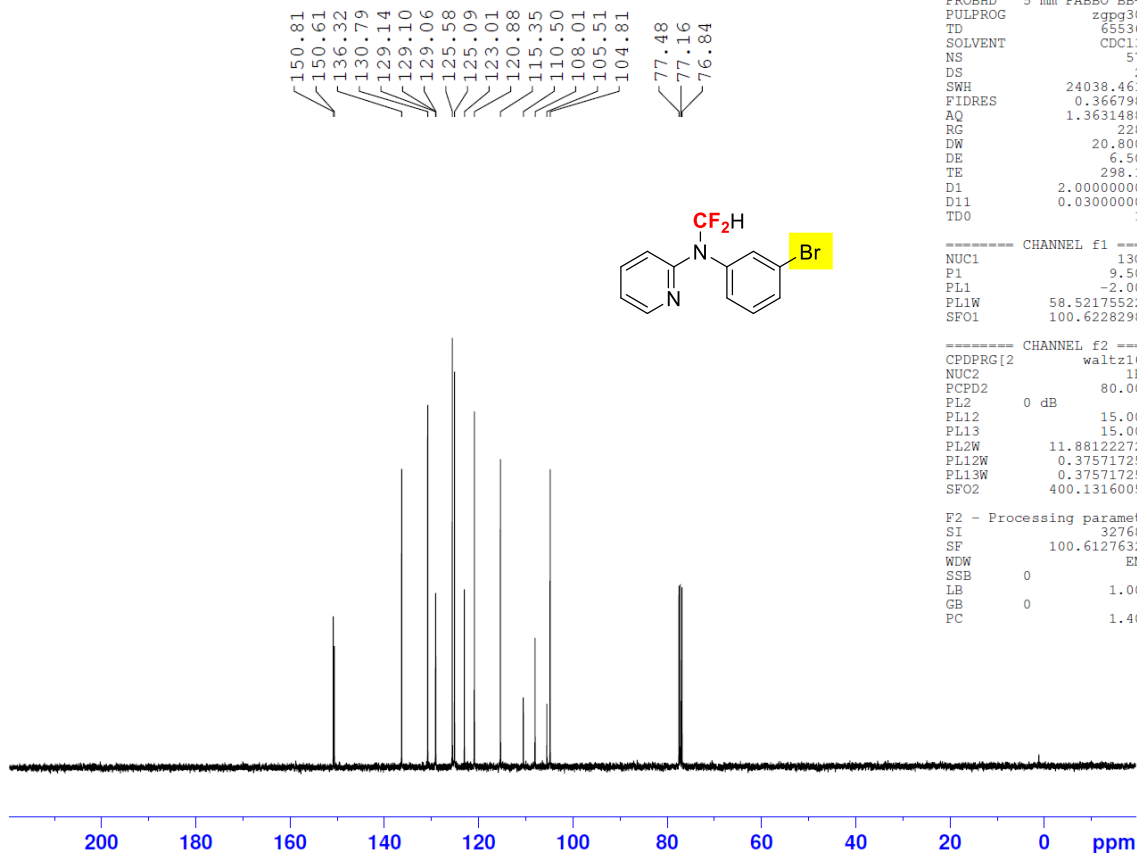

F2 - Acquisition Parameters  
 INSTRUM spect  
 PROBHD 5 mm PABBO BB-  
 PULPROG zgpg30  
 TD 65536  
 SOLVENT CDCl3  
 NS 57  
 DS 2  
 SWH 24038.461 Hz  
 FIDRES 0.366798 Hz  
 AQ 1.3631488 sec  
 RG 228  
 DW 20.800 usec  
 DE 6.50 usec  
 TE 298.1 K  
 D1 2.00000000 sec  
 D11 0.03000000 sec  
 TDO 1

----- CHANNEL f1 -----  
 NUC1 13C  
 P1 9.50 usec  
 PL1 -2.00 dB  
 PL1W 58.52175522 W  
 SFO1 100.6228298 MHz

----- CHANNEL f2 -----  
 CPDPRG[2] waltz16  
 NUC2 1H  
 PCPD2 80.00 usec  
 PL2 0 dB  
 PL12 15.00 dB  
 PL13 15.00 dB  
 PL2W 11.88122272 W  
 PL12W 0.37571725 W  
 PL13W 0.37571725 W  
 SFO2 400.1316005 MHz

F2 - Processing parameters  
 SI 32768  
 SF 100.6127632 MHz  
 WDW EM  
 SSB 0  
 LB 1.00 Hz  
 GB 0  
 PC 1.40

N-(3-Bromophenyl)-N-(difluoromethyl)pyridin-2-amine 19F

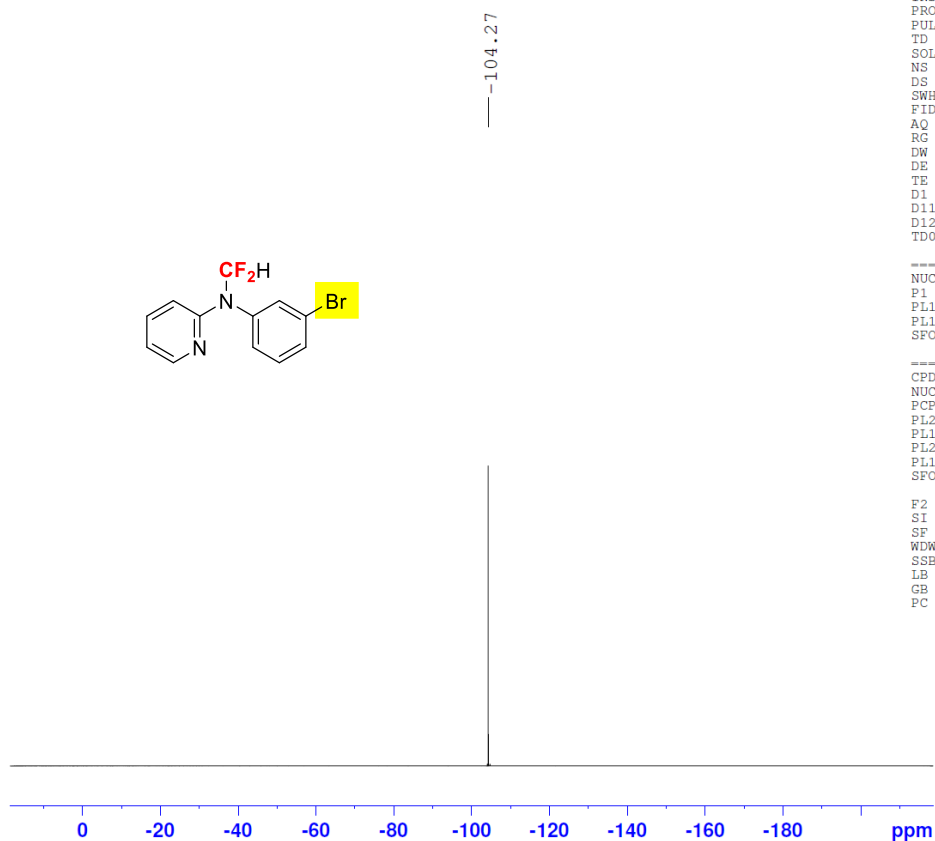

F2 - Acquisition Parameters  
 INSTRUM spect  
 PROBHD 5 mm PABBO BB-  
 PULPROG zgfhiggn  
 TD 131072  
 SOLVENT CDCl3  
 NS 16  
 DS 4  
 SWH 89285.711 Hz  
 FIDRES 0.681196 Hz  
 AQ 0.7340032 sec  
 RG 512  
 DW 5.600 usec  
 DE 6.50 usec  
 TE 298.2 K  
 D1 1.00000000 sec  
 D11 0.03000000 sec  
 D12 0.00002000 sec  
 TDO 1

----- CHANNEL f1 -----  
 NUC1 19F  
 P1 14.20 usec  
 PL1 -3.00 dB  
 PL1W 18.69428444 W  
 SFO1 376.4607164 MHz

----- CHANNEL f2 -----  
 CPDPRG[2] waltz16  
 NUC2 1H  
 PCPD2 80.00 usec  
 PL2 0 dB  
 PL12 15.00 dB  
 PL2W 11.88122272 W  
 PL12W 0.37571725 W  
 SFO2 400.1316005 MHz

F2 - Processing parameters  
 SI 65536  
 SF 376.4983660 MHz  
 WDW EM  
 SSB 0  
 LB 0.30 Hz  
 GB 0  
 PC 1.00

# N-(Difluoromethyl)-N-(3-methoxyphenyl)pyridin-2-amine (product 2g)

N-(Difluoromethyl)-N-(3-methoxyphenyl)pyridin-2-amine 1H

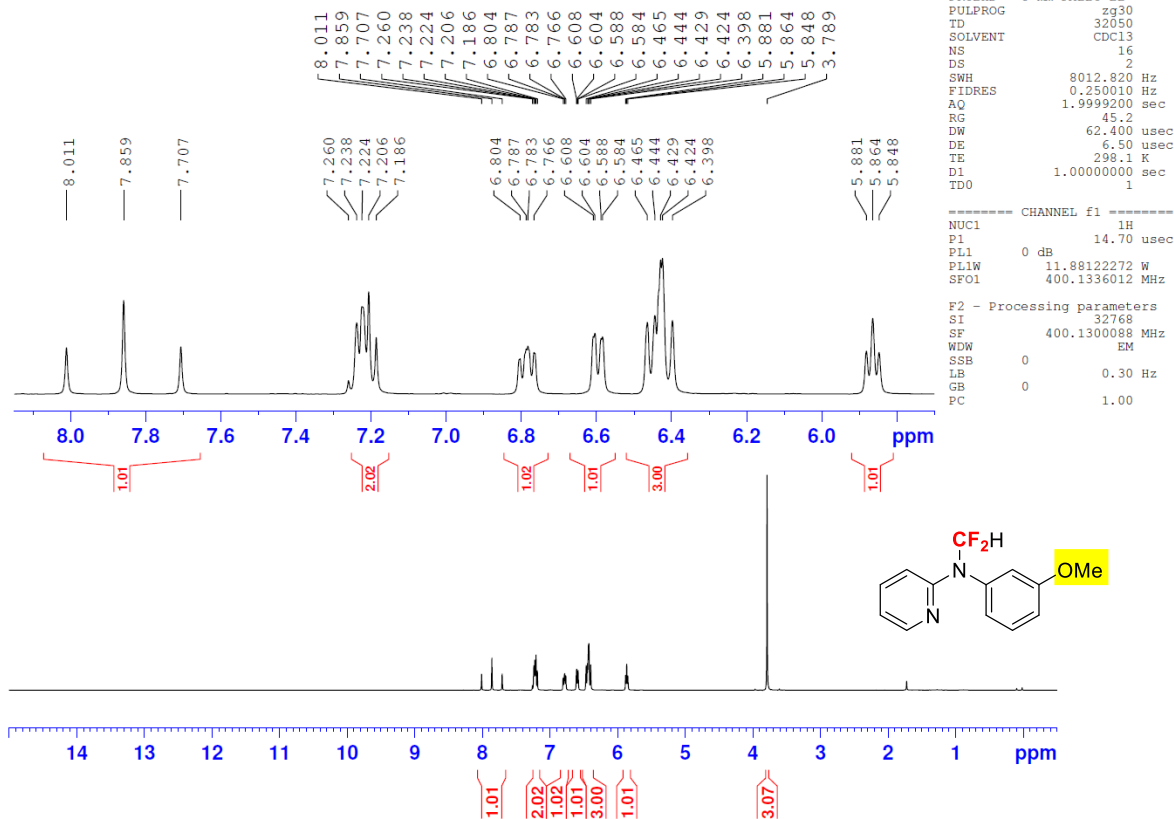

F2 - Acquisition Parameters  
 INSTRUM spect  
 PROBHD 5 mm PABBO BB-  
 PULPROG zg30  
 TD 32050  
 SOLVENT CDCl3  
 NS 16  
 DS 2  
 SWH 8012.820 Hz  
 FIDRES 0.250010 Hz  
 AQ 1.9999200 sec  
 RG 45.2  
 DW 62.400 usec  
 DE 6.50 usec  
 TE 298.1 K  
 D1 1.00000000 sec  
 TDO 1

CHANNEL f1  
 NUC1 1H  
 P1 14.70 usec  
 PL1 0 dB  
 PL1W 11.88122272 W  
 SFO1 400.1336012 MHz

F2 - Processing parameters  
 SI 32768  
 SF 400.1300088 MHz  
 WDW EM  
 SSB 0  
 LB 0.30 Hz  
 GB 0  
 PC 1.00

N-(Difluoromethyl)-N-(3-methoxyphenyl)pyridin-2-amine 13C

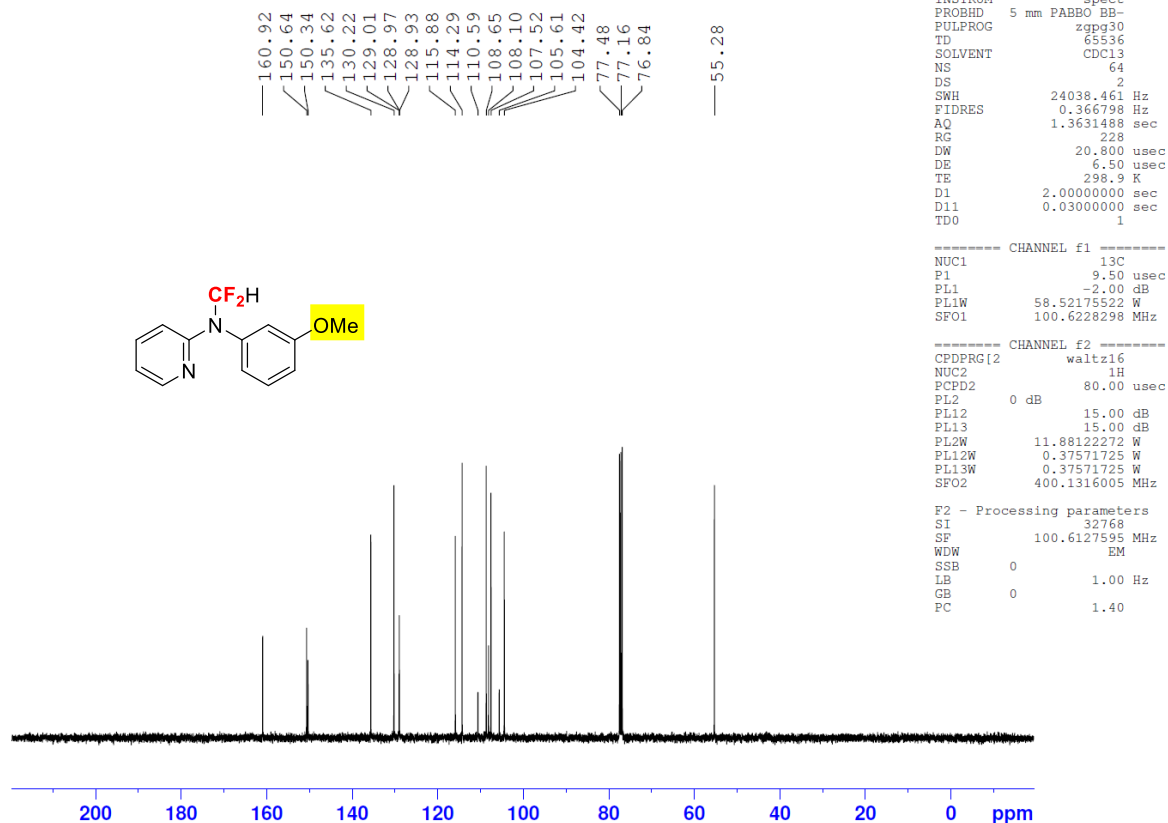

F2 - Acquisition Parameters  
 INSTRUM spect  
 PROBHD 5 mm PABBO BB-  
 PULPROG zgpg30  
 TD 65536  
 SOLVENT CDCl3  
 NS 64  
 DS 2  
 SWH 24038.461 Hz  
 FIDRES 0.366798 Hz  
 AQ 1.3631488 sec  
 RG 228  
 DW 20.800 usec  
 DE 6.50 usec  
 TE 298.9 K  
 D1 2.00000000 sec  
 D11 0.03000000 sec  
 TDO 1

CHANNEL f1  
 NUC1 13C  
 P1 9.50 usec  
 PL1 -2.00 dB  
 PL1W 58.52175522 W  
 SFO1 100.6228298 MHz

CHANNEL f2  
 CPDPRG2 waltz16  
 NUC2 1H  
 PCPD2 80.00 usec  
 PL2 0 dB  
 PL12 15.00 dB  
 PL13 15.00 dB  
 PL2W 11.88122272 W  
 PL12W 0.37571725 W  
 PL13W 0.37571725 W  
 SFO2 400.1316005 MHz

F2 - Processing parameters  
 SI 32768  
 SF 100.6127595 MHz  
 WDW EM  
 SSB 0  
 LB 1.00 Hz  
 GB 0  
 PC 1.40

N-(Difluoromethyl)-N-(3-methoxyphenyl)pyridin-2-amine 19F

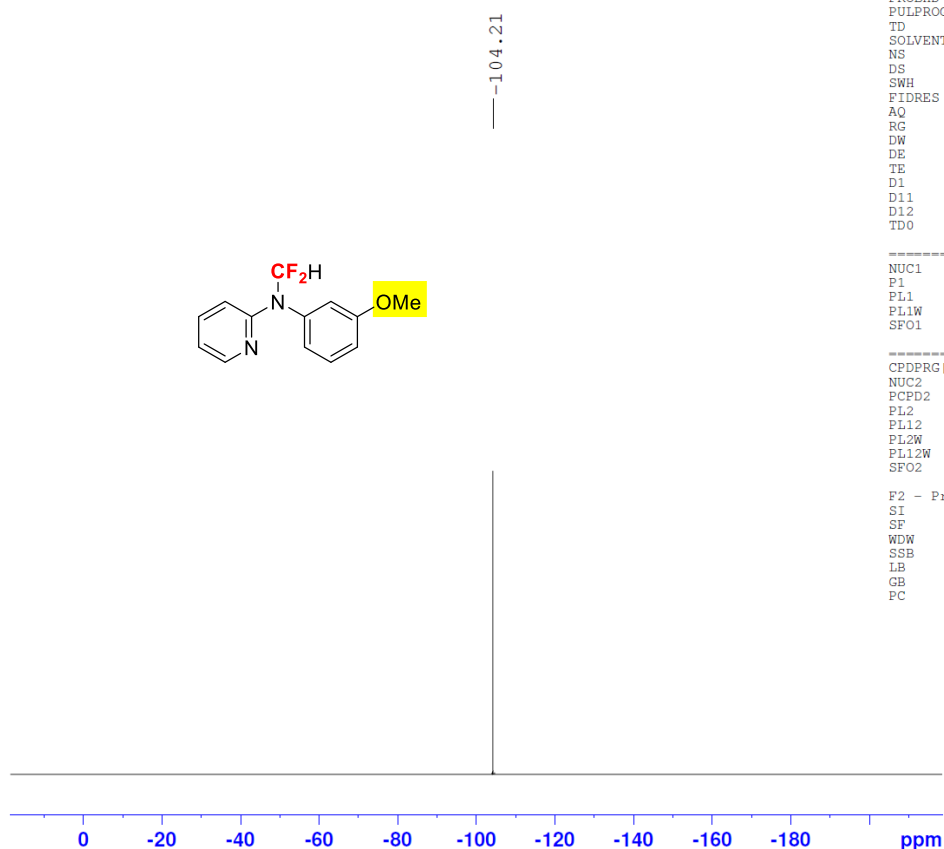

F2 - Acquisition Parameters  
 INSTRUM spect  
 PROBHD 5 mm PABBO BB-  
 PULPROG zgpg30  
 TD 131072  
 SOLVENT CDC13  
 NS 16  
 DS 4  
 SWH 89285.711 Hz  
 FIDRES 0.681196 Hz  
 AQ 0.7340032 sec  
 RG 724  
 DW 5.600 usec  
 DE 6.50 usec  
 TE 298.3 K  
 D1 1.0000000 sec  
 D11 0.0300000 sec  
 D12 0.0000200 sec  
 TD0 1

CHANNEL f1  
 NUC1 19F  
 P1 14.20 usec  
 PL1 -3.00 dB  
 PL1W 18.69428444 W  
 SFO1 376.4607164 MHz

CHANNEL f2  
 CPDPRG2 waltz16  
 NUC2 1H  
 PCPD2 80.00 usec  
 PL2 0 dB  
 PL12 15.00 dB  
 PL2W 11.88122272 W  
 PL12W 0.37571725 W  
 SFO2 400.1316005 MHz

F2 - Processing parameters  
 SI 6536  
 SF 376.4983660 MHz  
 WDW EM  
 SSB 0  
 LB 0.30 Hz  
 GB 0  
 PC 1.00

Ethyl 3-((difluoromethyl)(pyridin-2-yl)amino)benzoate (product 2h)

Ethyl 3-((difluoromethyl)(pyridin-2-yl)amino)benzoate 1H

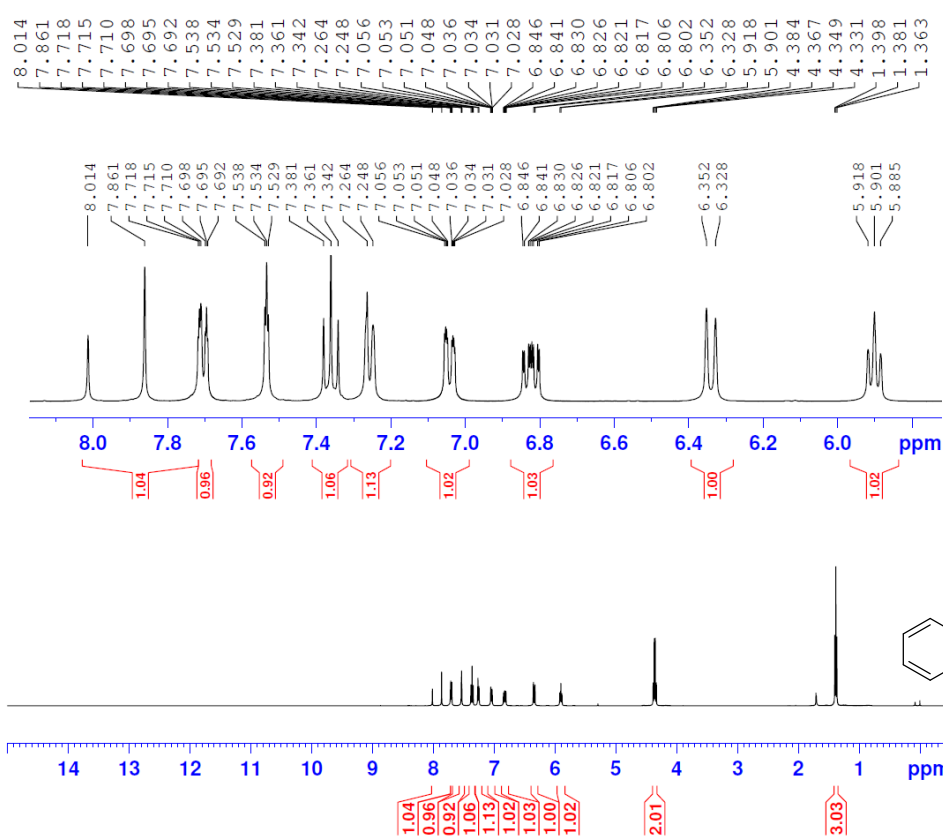

F2 - Acquisition Parameters  
 INSTRUM spect  
 PROBHD 5 mm PABBO BB-  
 PULPROG zg30  
 TD 16384  
 SOLVENT CDC13  
 NS 16  
 DS 2  
 SWH 8012.820 Hz  
 FIDRES 0.489064 Hz  
 AQ 1.0223616 sec  
 RG 71.8  
 DW 62.400 usec  
 DE 6.50 usec  
 TE 299.5 K  
 D1 1.0000000 sec  
 TD0 1

CHANNEL f1  
 NUC1 1H  
 P1 14.70 usec  
 PL1 0 dB  
 PL1W 11.88122272 W  
 SFO1 400.1336012 MHz

F2 - Processing parameters  
 SI 32768  
 SF 400.1300077 MHz  
 WDW EM  
 SSB 0  
 LB 0.30 Hz  
 GB 0  
 PC 1.00

Ethyl 3-((difluoromethyl) (pyridin-2-yl)amino)benzoate 13C

166.82  
150.68  
149.43  
136.17  
131.92  
129.54  
129.22  
129.18  
129.15  
126.83  
123.92  
123.10  
115.44  
110.59  
108.10  
105.61  
104.69  
77.48  
77.16  
76.84  
61.01  
14.45

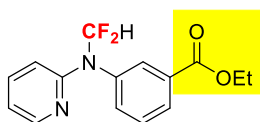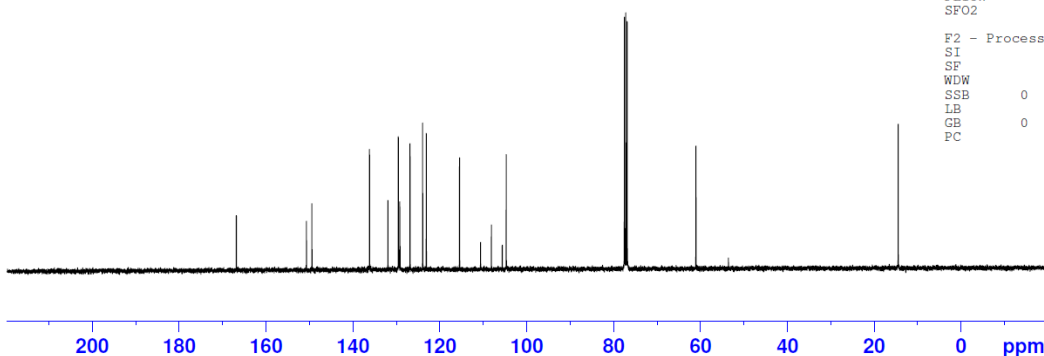

F2 - Acquisition Parameters  
INSTRUM spect  
PROBHD 5 mm PABBO BB-  
PULPROG zgpg30  
TD 65536  
SOLVENT CDC13  
NS 274  
DS 2  
SWH 24038.461 Hz  
FIDRES 0.366798 Hz  
AQ 1.3631488 sec  
RG 181  
DW 20.800 usec  
DE 6.50 usec  
TE 301.2 K  
D1 2.0000000 sec  
D11 0.0300000 sec  
TD0 1

===== CHANNEL f1 =====  
NUC1 13C  
P1 9.50 usec  
PL1 -2.00 dB  
PL1W 58.52175522 W  
SFO1 100.6228298 MHz  
===== CHANNEL f2 =====  
CPDPRG[2] waltz16  
NUC2 1H  
PCPD2 80.00 usec  
PL2 0 dB  
PL12 15.00 dB  
PL13 15.00 dB  
PL2W 11.88122272 W  
PL12W 0.37571725 W  
PL13W 0.37571725 W  
SFO2 400.1316005 MHz

F2 - Processing parameters  
SI 32768  
SF 100.6127554 MHz  
WDW EM  
SSB 0  
LB 1.00 Hz  
GB 0  
PC 1.40

Ethyl 3-((difluoromethyl) (pyridin-2-yl)amino)benzoate 19F

-104.31

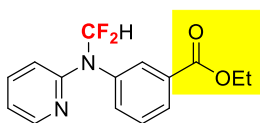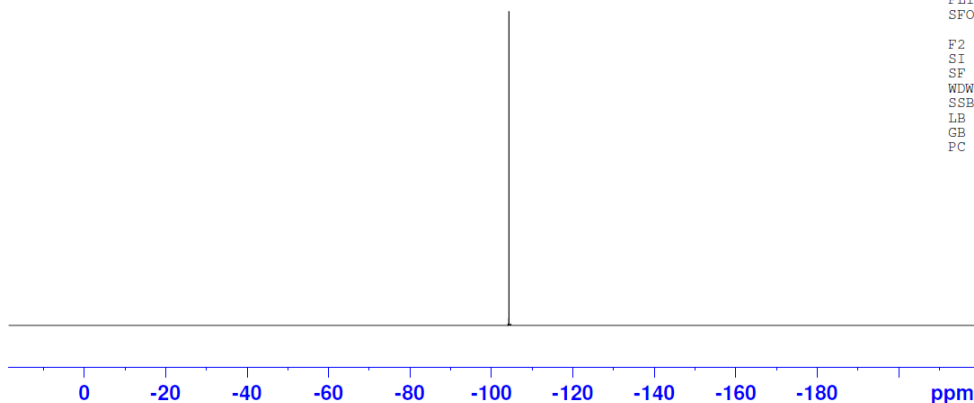

F2 - Acquisition Parameters  
INSTRUM spect  
PROBHD 5 mm PABBO BB-  
PULPROG zgfhgqn  
TD 131072  
SOLVENT CDC13  
NS 16  
DS 4  
SWH 89285.711 Hz  
FIDRES 0.681196 Hz  
AQ 0.7340032 sec  
RG 1030  
DW 5.600 usec  
DE 6.50 usec  
TE 299.5 K  
D1 1.0000000 sec  
D11 0.0300000 sec  
D12 0.0000200 sec  
TD0 1

===== CHANNEL f1 =====  
NUC1 19F  
P1 14.20 usec  
PL1 -3.00 dB  
PL1W 18.69428444 W  
SFO1 376.4607164 MHz  
===== CHANNEL f2 =====  
CPDPRG[2] waltz16  
NUC2 1H  
PCPD2 80.00 usec  
PL2 0 dB  
PL12 15.00 dB  
PL2W 11.88122272 W  
PL12W 0.37571725 W  
SFO2 400.1316005 MHz

F2 - Processing parameters  
SI 65536  
SF 376.4983660 MHz  
WDW EM  
SSB 0  
LB 0.30 Hz  
GB 0  
PC 1.00

# N-(Difluoromethyl)-N-(3-(trifluoromethyl)phenyl)pyridin-2-amine (product 2i)

N-(Difluoromethyl)-N-(3-(trifluoromethyl)phenyl)pyridin-2-amine 1H

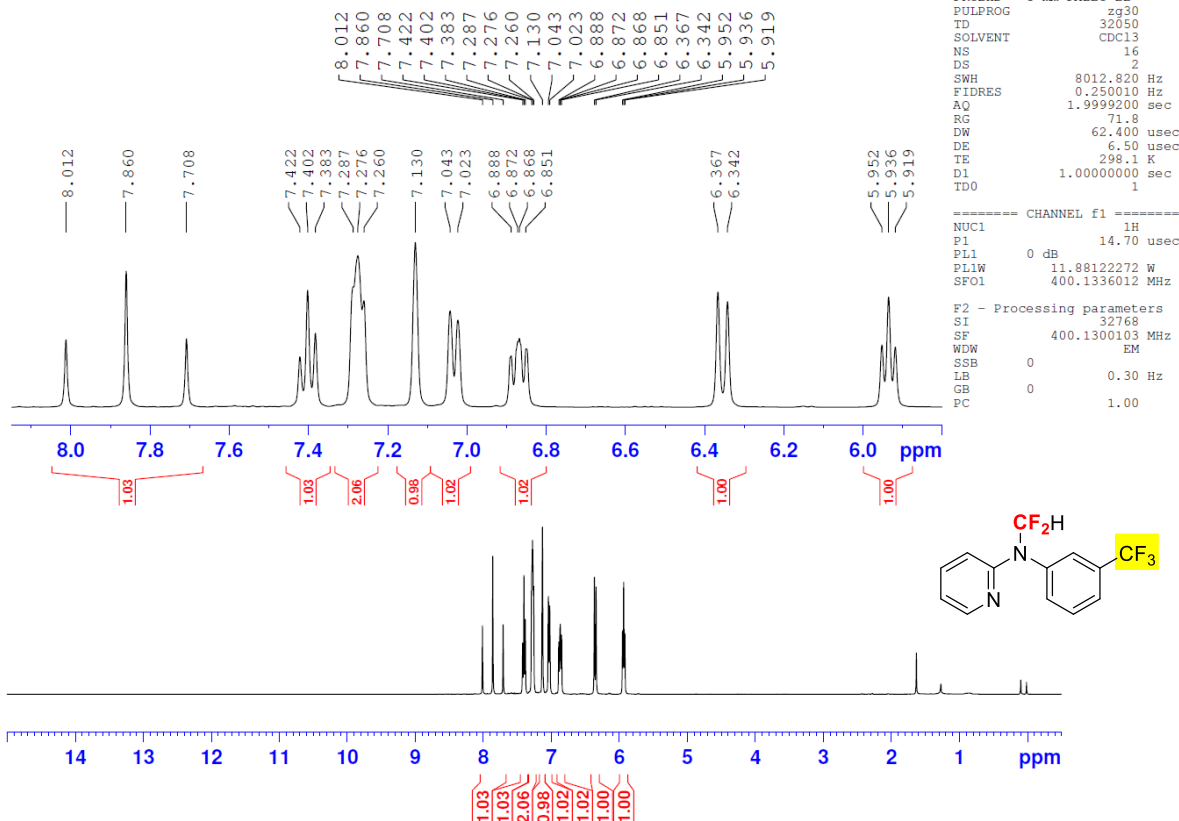

N-(Difluoromethyl)-N-(3-(trifluoromethyl)phenyl)pyridin-2-amine 13C

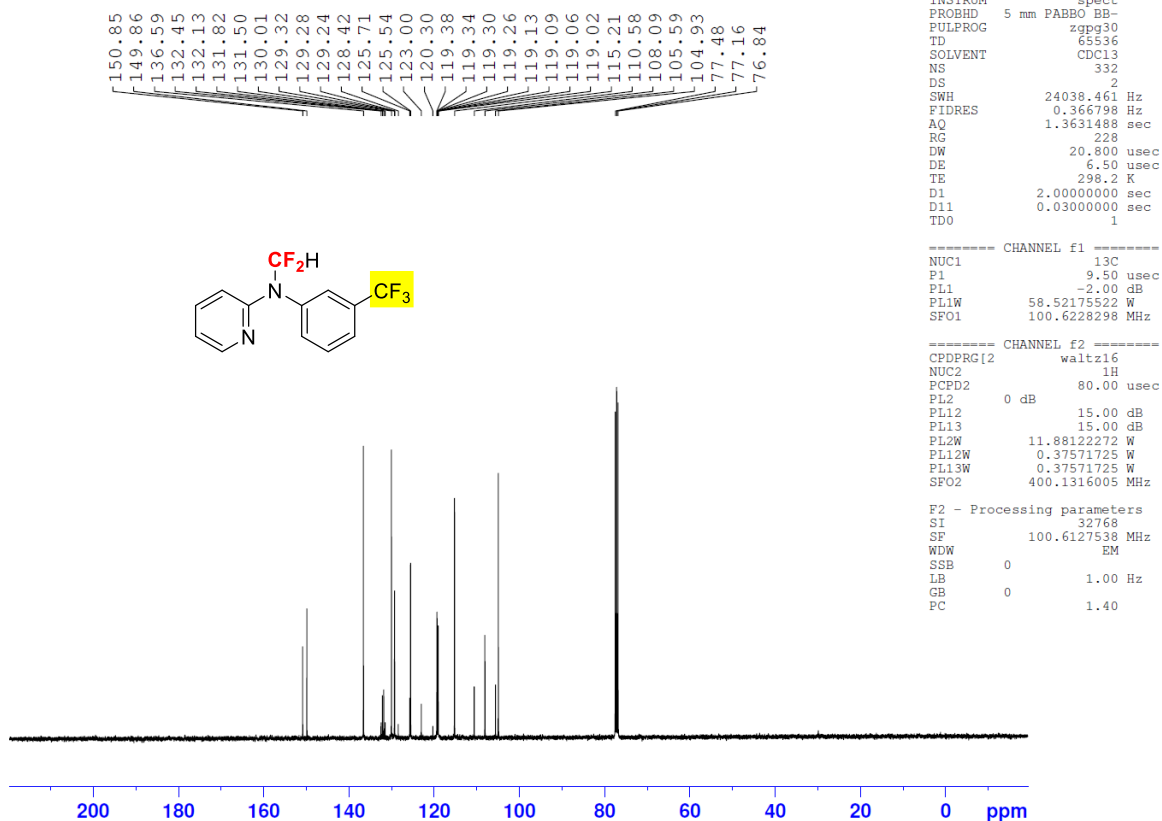



N-(Difluoromethyl)-N-(3-(trifluoromethyl)phenyl)pyridin-2-amine 19F

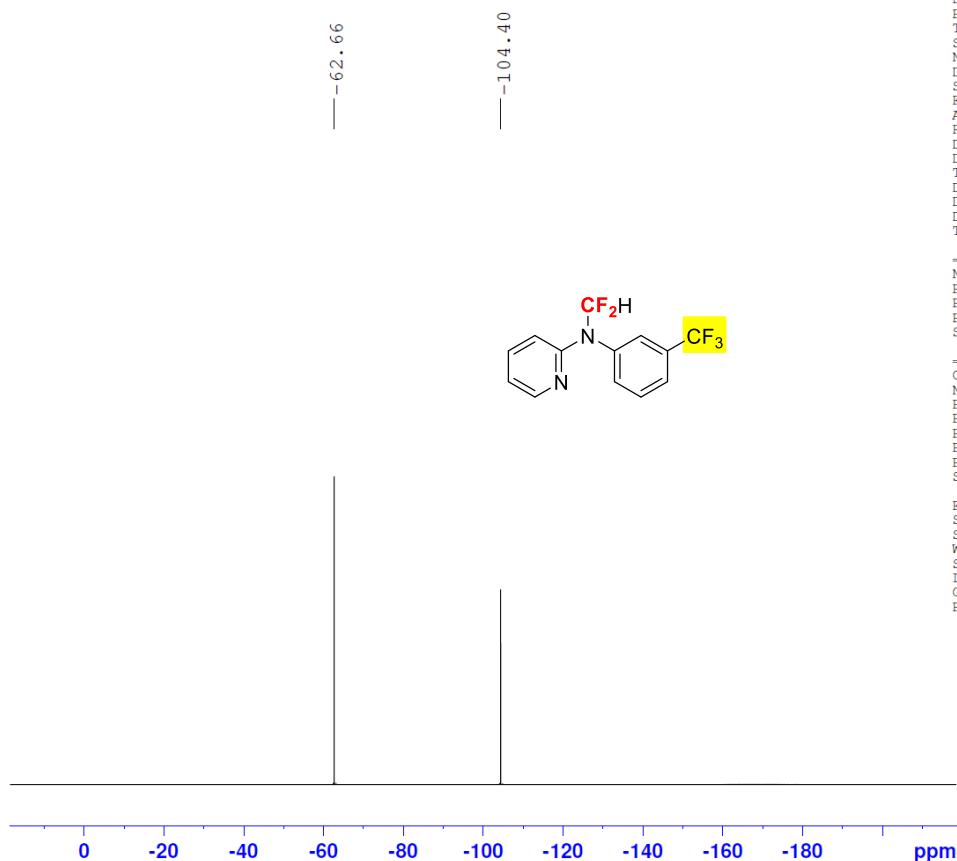

F2 - Acquisition Parameters  
 INSTRUM spect  
 PROBHD 5 mm PABBO BB-  
 PULPROG zgfhigpn  
 TD 131072  
 SOLVENT CDC13  
 NS 16  
 DS 4  
 SWH 89285.711 Hz  
 FIDRES 0.681196 Hz  
 AQ 0.7340032 sec  
 RG 456  
 DW 5.600 usec  
 DE 6.50 usec  
 TE 298.1 K  
 D1 1.0000000 sec  
 D11 0.0300000 sec  
 D12 0.0000200 sec  
 TDO 1

===== CHANNEL f1 =====  
 NUC1 19F  
 P1 14.20 usec  
 PL1 -3.00 dB  
 PL1W 18.69428444 W  
 SFO1 376.4607164 MHz

===== CHANNEL f2 =====  
 CPDPRG2 waltz16  
 NUC2 1H  
 PCPD2 80.00 usec  
 PL2 0 dB  
 PL12 15.00 dB  
 PL2W 11.88122272 W  
 PL12W 0.37571725 W  
 SFO2 400.1316005 MHz

F2 - Processing parameters  
 SI 65536  
 SF 376.4983660 MHz  
 WDW EM  
 SSB 0  
 LB 0.30 Hz  
 GB 0  
 PC 1.00

N-(Difluoromethyl)-N-(2-methoxyphenyl)pyridin-2-amine (product 2j)

N-(Difluoromethyl)-N-(2-methoxyphenyl)pyridin-2-amine 1H

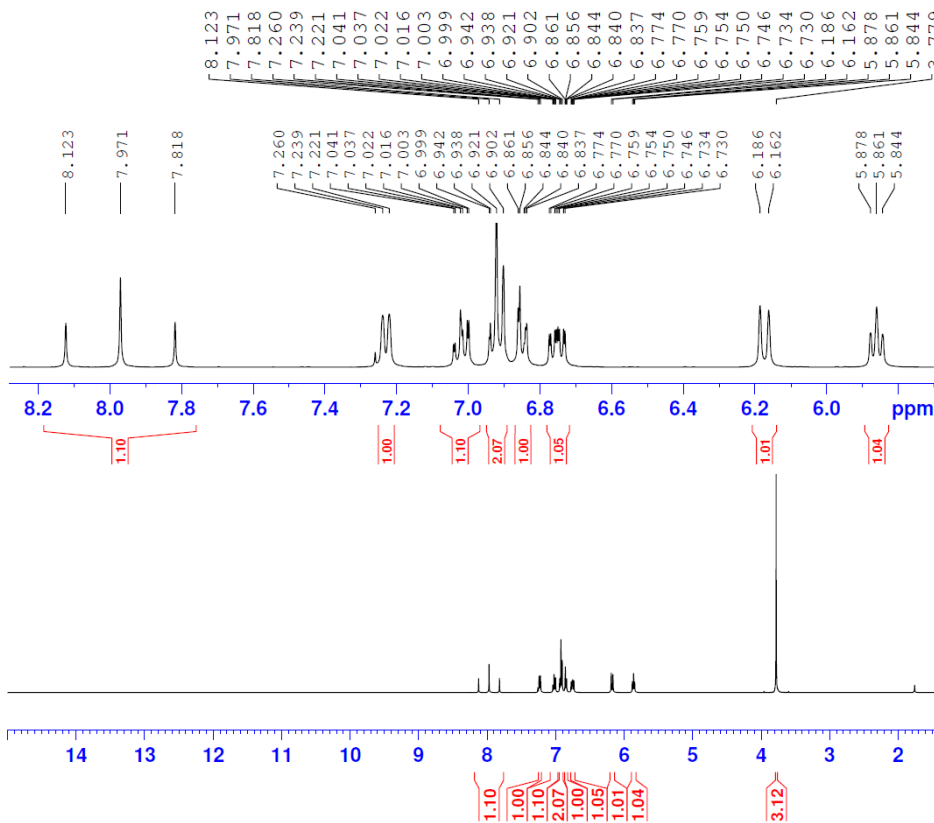

F2 - Acquisition Parameters  
 INSTRUM spect  
 PROBHD 5 mm PABBO BB-  
 PULPROG zg30  
 TD 16384  
 SOLVENT CDC13  
 NS 16  
 DS 2  
 SWH 8012.820 Hz  
 FIDRES 0.489064 Hz  
 AQ 1.0223616 sec  
 RG 50.8  
 DW 62.400 usec  
 DE 6.50 usec  
 TE 299.3 K  
 D1 1.0000000 sec  
 TDO 1

===== CHANNEL f1 =====  
 NUC1 1H  
 P1 14.70 usec  
 PL1 0 dB  
 PL1W 11.88122272 W  
 SFO1 400.1336012 MHz

F2 - Processing parameters  
 SI 32768  
 SF 400.1300091 MHz  
 WDW EM  
 SSB 0  
 LB 0.30 Hz  
 GB 0  
 PC 1.00

N- (Difluoromethyl)-N- (2-methoxyphenyl)pyridin-2-amine 13C

151.50  
150.67  
138.10  
134.86  
128.69  
128.65  
128.61  
123.56  
123.27  
121.42  
116.58  
112.15  
110.64  
108.15  
105.66  
104.30  
77.48  
77.16  
76.84  
— 55.79

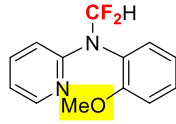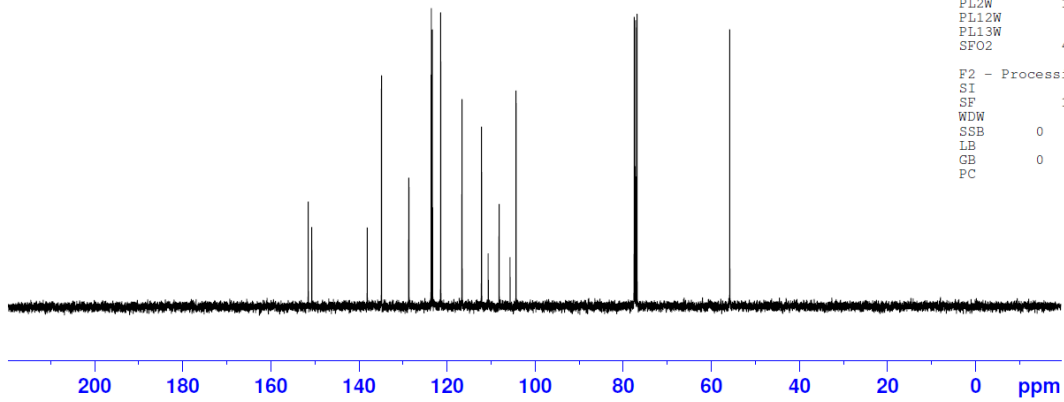

F2 - Acquisition Parameters  
INSTRUM spect  
PROBHD 5 mm PABBO BB-  
PULPROG zgpg30  
TD 65536  
SOLVENT CDC13  
NS 53  
DS 2  
SWH 24038.461 Hz  
FIDRES 0.366798 Hz  
AQ 1.3631488 sec  
RG 71.8  
DW 20.800 usec  
DE 6.50 usec  
TE 299.9 K  
D1 2.0000000 sec  
D11 0.0300000 sec  
TD0 1

----- CHANNEL f1 -----  
NUC1 13C  
P1 9.50 usec  
PL1 -2.00 dB  
PL1W 58.52175522 W  
SFO1 100.6228298 MHz

----- CHANNEL f2 -----  
CPDPRG[2] waltz16  
NUC2 1H  
PCPD2 80.00 usec  
PL2 0 dB  
PL12 15.00 dB  
PL13 15.00 dB  
PL2W 11.88122272 W  
PL12W 0.37571725 W  
PL13W 0.37571725 W  
SFO2 400.1316005 MHz

F2 - Processing parameters  
SI 32768  
SF 100.6127601 MHz  
WDW EM  
SSB 0  
LB 1.00 Hz  
GB 0  
PC 1.40

N- (Difluoromethyl)-N- (2-methoxyphenyl)pyridin-2-amine 19F

— -104.07

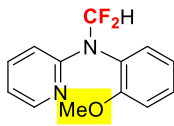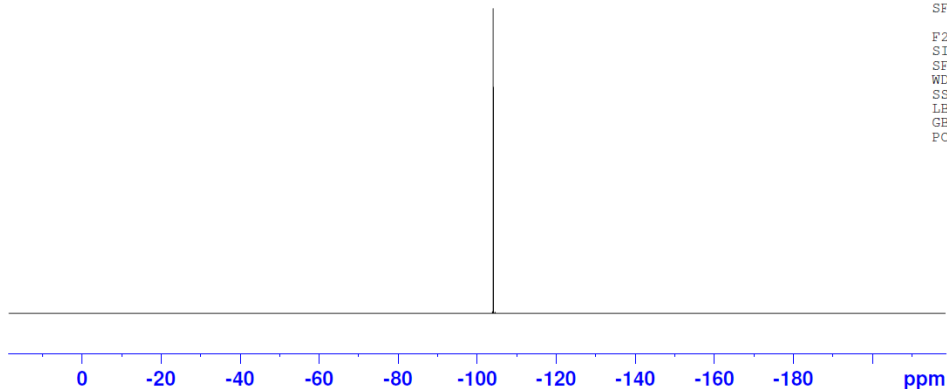

F2 - Acquisition Parameters  
INSTRUM spect  
PROBHD 5 mm PABBO BB-  
PULPROG zgfhggn  
TD 131072  
SOLVENT CDC13  
NS 16  
DS 4  
SWH 89285.711 Hz  
FIDRES 0.681196 Hz  
AQ 0.7340032 sec  
RG 724  
DW 5.600 usec  
DE 6.50 usec  
TE 299.6 K  
D1 1.0000000 sec  
D11 0.0300000 sec  
D12 0.00002000 sec  
TD0 1

----- CHANNEL f1 -----  
NUC1 19F  
P1 14.20 usec  
PL1 -3.00 dB  
PL1W 18.69428444 W  
SFO1 376.4607164 MHz

----- CHANNEL f2 -----  
CPDPRG[2] waltz16  
NUC2 1H  
PCPD2 80.00 usec  
PL2 0 dB  
PL12 15.00 dB  
PL2W 11.88122272 W  
PL12W 0.37571725 W  
SFO2 400.1316005 MHz

F2 - Processing parameters  
SI 65536  
SF 376.4983660 MHz  
WDW EM  
SSB 0  
LB 0.30 Hz  
GB 0  
PC 1.00

# N-(Difluoromethyl)-N-(2-phenoxyphenyl)pyridin-2-amine (product 2k)

N-(Difluoromethyl)-N-(2-phenoxyphenyl)pyridin-2-amine 1H

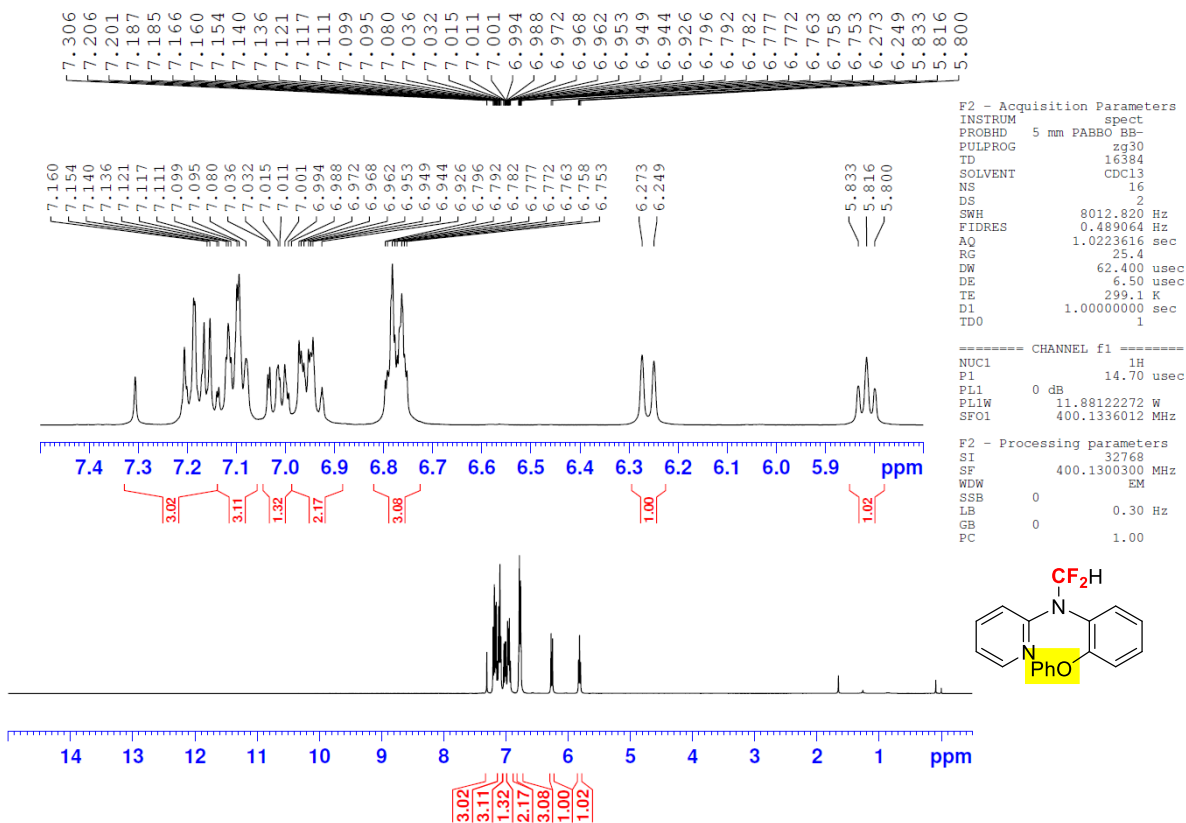

N-(Difluoromethyl)-N-(2-phenoxyphenyl)pyridin-2-amine 19F

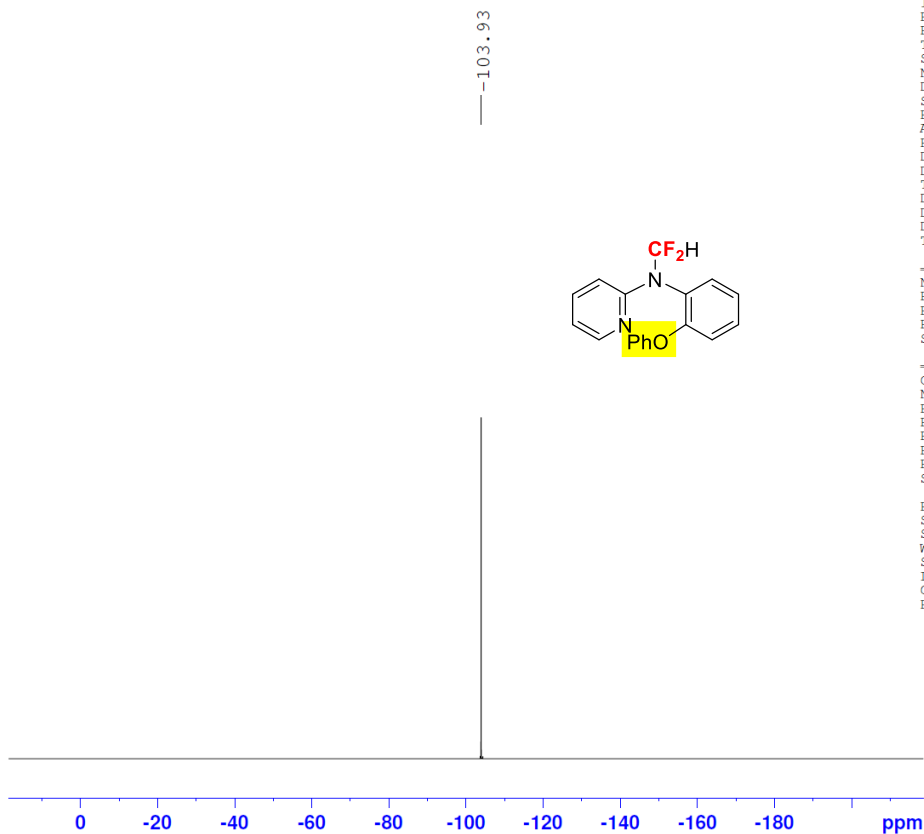

F2 - Acquisition Parameters  
 INSTRUM spect  
 PROBHD 5 mm PABBO BB-  
 PULPROG zgfh1qgn  
 TD 131072  
 SOLVENT CDCl3  
 NS 16  
 DS 4  
 SWH 89285.711 Hz  
 FIDRES 0.681196 Hz  
 AQ 0.7340032 sec  
 RG 645  
 DW 5.600 usec  
 DE 6.50 usec  
 TE 299.3 K  
 D1 1.00000000 sec  
 D11 0.03000000 sec  
 D12 0.00002000 sec  
 TDO 1

===== CHANNEL f1 =====  
 NUC1 19F  
 P1 14.20 usec  
 PL1 -3.00 dB  
 PL1W 18.69428444 W  
 SFO1 376.4607164 MHz

===== CHANNEL f2 =====  
 CPDPRG[2] waltz16  
 NUC2 1H  
 PCPD2 80.00 usec  
 PL2 0 dB  
 PL12 15.00 dB  
 PL2W 11.88122272 W  
 PL12W 0.37571725 W  
 SFO2 400.1316005 MHz

F2 - Processing parameters  
 SI 65536  
 SF 376.4983660 MHz  
 WDW EM  
 SSB 0  
 LB 0.30 Hz  
 GB 0  
 PC 1.00

N-(Difluoromethyl)-N-(2,4-dimethoxyphenyl)pyridin-2-amine (product 2I)

N-(Difluoromethyl)-N-(2,4-dimethoxyphenyl)pyridin-2-amine 1H

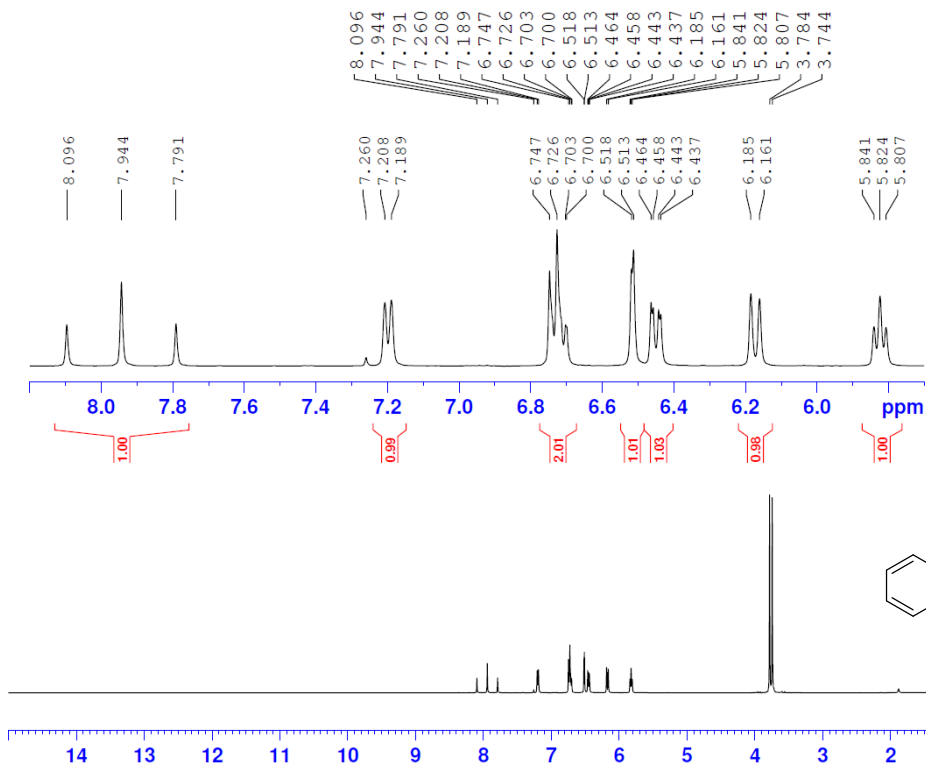

F2 - Acquisition Parameters  
 INSTRUM spect  
 PROBHD 5 mm PABBO BB-  
 PULPROG zg30  
 TD 32050  
 SOLVENT CDCl3  
 NS 16  
 DS 2  
 SWH 8012.820 Hz  
 FIDRES 0.250010 Hz  
 AQ 1.9999200 sec  
 RG 32  
 DW 62.400 usec  
 DE 6.50 usec  
 TE 298.0 K  
 D1 1.00000000 sec  
 TDO 1

===== CHANNEL f1 =====  
 NUC1 1H  
 P1 14.70 usec  
 PL1 0 dB  
 PL1W 11.88122272 W  
 SFO1 400.1336012 MHz

F2 - Processing parameters  
 SI 32768  
 SF 400.1300089 MHz  
 WDW EM  
 SSB 0  
 LB 0.30 Hz  
 GB 0  
 PC 1.00

N-(Difluoromethyl)-N-(2,4-dimethoxyphenyl)pyridin-2-amine 13C

156.41  
152.10  
151.10  
134.62  
131.39  
128.63  
128.60  
128.56  
123.05  
116.56  
110.56  
108.08  
105.59  
104.68  
104.12  
100.10  
77.48  
77.16  
76.84  
55.73  
55.55

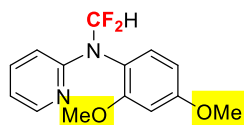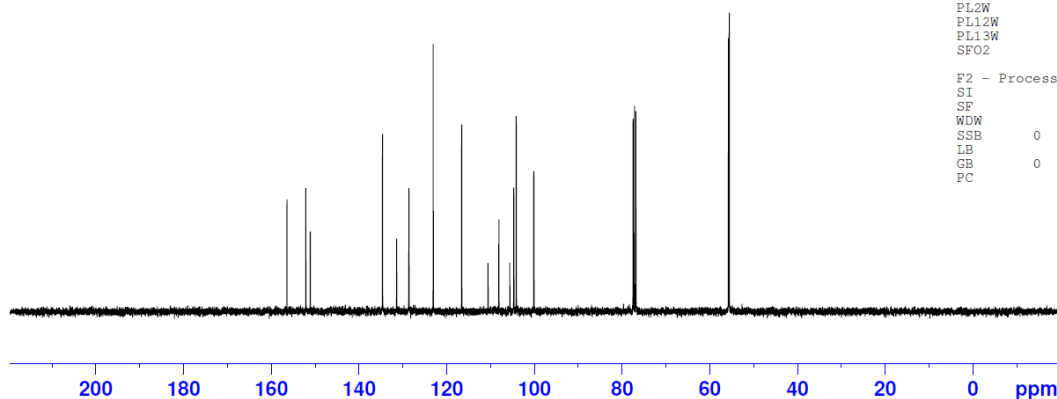

F2 - Acquisition Parameters  
INSTRUM spect  
PROBHD 5 mm PABBO BB-  
PULPROG zgpg30  
TD 65536  
SOLVENT CDC13  
NS 44  
DS 2  
SWH 24038.461 Hz  
FIDRES 0.366798 Hz  
AQ 1.3631488 sec  
RG 228  
DW 20.800 usec  
DE 6.50 usec  
TE 298.9 K  
D1 2.00000000 sec  
D11 0.03000000 sec  
TD0 1

===== CHANNEL f1 =====  
NUC1 13C  
P1 9.50 usec  
PL1 -2.00 dB  
PL1W 58.52175522 W  
SFO1 100.6228298 MHz

===== CHANNEL f2 =====  
CPDPRG[2] waltz16  
NUC2 1H  
PCPD2 80.00 usec  
PL2 0 dB  
PL12 15.00 dB  
PL13 15.00 dB  
PL2W 11.88122272 W  
PL12W 0.37571725 W  
PL13W 0.37571725 W  
SFO2 400.1316005 MHz

F2 - Processing parameters  
SI 32768  
SF 100.6127633 MHz  
WDW EM  
SSB 0  
LB 1.00 Hz  
GB 0  
PC 1.40

N-(Difluoromethyl)-N-(2,4-dimethoxyphenyl)pyridin-2-amine 19F

-104.03

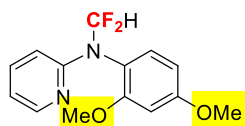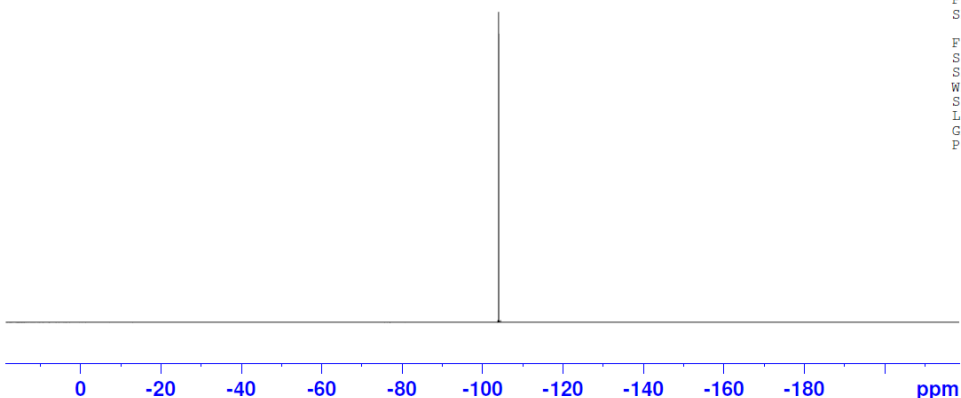

F2 - Acquisition Parameters  
INSTRUM spect  
PROBHD 5 mm PABBO BB-  
PULPROG zgFh1ggn  
TD 131072  
SOLVENT CDC13  
NS 16  
DS 4  
SWH 89285.711 Hz  
FIDRES 0.681196 Hz  
AQ 0.7340032 sec  
RG 645  
DW 5.600 usec  
DE 6.50 usec  
TE 298.3 K  
D1 1.00000000 sec  
D11 0.03000000 sec  
D12 0.00002000 sec  
TD0 1

===== CHANNEL f1 =====  
NUC1 19F  
P1 14.20 usec  
PL1 -3.00 dB  
PL1W 18.69428444 W  
SFO1 376.4607164 MHz

===== CHANNEL f2 =====  
CPDPRG[2] waltz16  
NUC2 1H  
PCPD2 80.00 usec  
PL2 0 dB  
PL12 15.00 dB  
PL2W 11.88122272 W  
PL12W 0.37571725 W  
SFO2 400.1316005 MHz

F2 - Processing parameters  
SI 65536  
SF 376.4983660 MHz  
WDW EM  
SSB 0  
LB 0.30 Hz  
GB 0  
PC 1.00



N-(2,4-Dichlorophenyl)-N-(difluoromethyl)pyridin-2-amine 19F

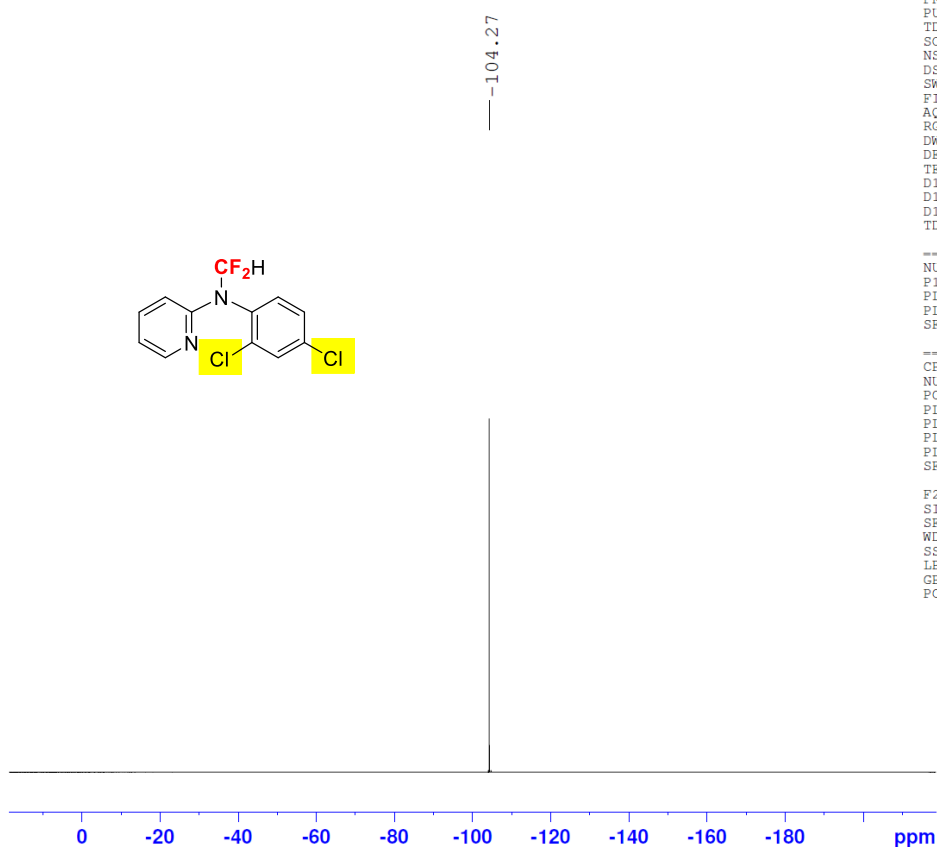

F2 - Acquisition Parameters  
 INSTRUM spect  
 PROBHD 5 mm PABBO BB-  
 PULPROG zgfhlggn  
 TD 131072  
 SOLVENT CDC13  
 NS 16  
 DS 4  
 SWH 89285.711 Hz  
 FIDRES 0.681196 Hz  
 AQ 0.7340032 sec  
 RG 645  
 DW 5.600 usec  
 DE 6.50 usec  
 TE 298.4 K  
 D1 1.00000000 sec  
 D11 0.03000000 sec  
 D12 0.00002000 sec  
 TDO 1

----- CHANNEL f1 -----  
 NUC1 19F  
 P1 14.20 usec  
 PL1 -3.00 dB  
 PL1W 18.69428444 W  
 SFO1 376.4607164 MHz

----- CHANNEL f2 -----  
 CPDPRG[2] waltz16  
 NUC2 1H  
 FCFD2 80.00 usec  
 PL2 0 dB  
 PL12 15.00 dB  
 PL2W 11.88122272 W  
 PL12W 0.37571725 W  
 SFO2 400.1316005 MHz

F2 - Processing parameters  
 SI 65536  
 SF 376.4983660 MHz  
 WDW EM  
 SSB 0  
 LB 0.30 Hz  
 GB 0  
 PC 1.00

4-Chloro-3-((difluoromethyl)(pyridin-2-yl)amino)phenol (product 2n)

4-Chloro-3-((difluoromethyl)(pyridin-2-yl)amino)phenol 1H

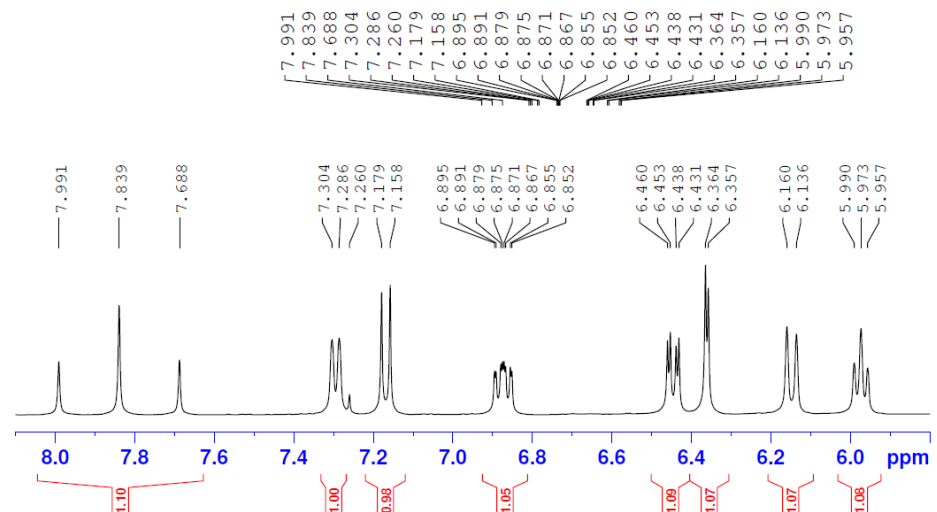

F2 - Acquisition Parameters  
 INSTRUM spect  
 PROBHD 5 mm PABBO BB-  
 PULPROG zg30  
 TD 16384  
 SOLVENT CDC13  
 NS 16  
 DS 2  
 SWH 8012.820 Hz  
 FIDRES 0.489064 Hz  
 AQ 1.0223616 sec  
 RG 71.8  
 DW 62.400 usec  
 DE 6.50 usec  
 TE 299.7 K  
 D1 1.00000000 sec  
 TDO 1

----- CHANNEL f1 -----  
 NUC1 1H  
 P1 14.70 usec  
 PL1 0 dB  
 PL1W 11.88122272 W  
 SFO1 400.1336012 MHz

F2 - Processing parameters  
 SI 32768  
 SF 400.1300092 MHz  
 WDW EM  
 SSB 0  
 LB 0.30 Hz  
 GB 0  
 PC 1.00

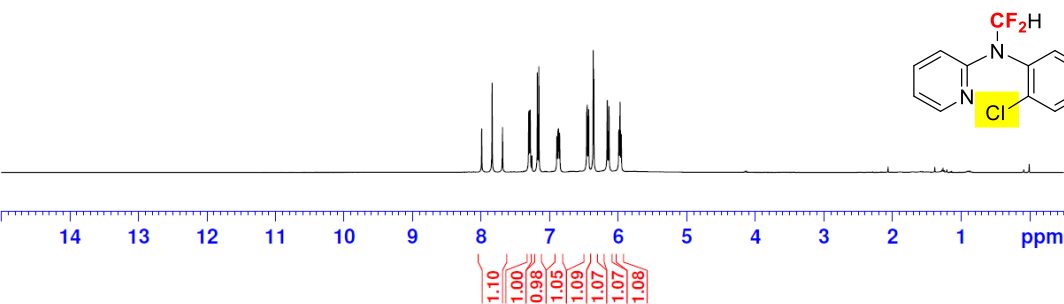

4-Chloro-3-((difluoromethyl) (pyridin-2-yl) amino)phenol 13C

155.48  
151.23  
146.58  
136.41  
130.72  
128.96  
128.92  
128.88  
118.59  
116.07  
111.51  
110.85  
110.66  
108.16  
105.66  
105.24  
77.48  
77.16  
76.84

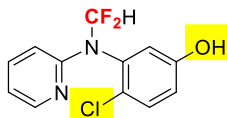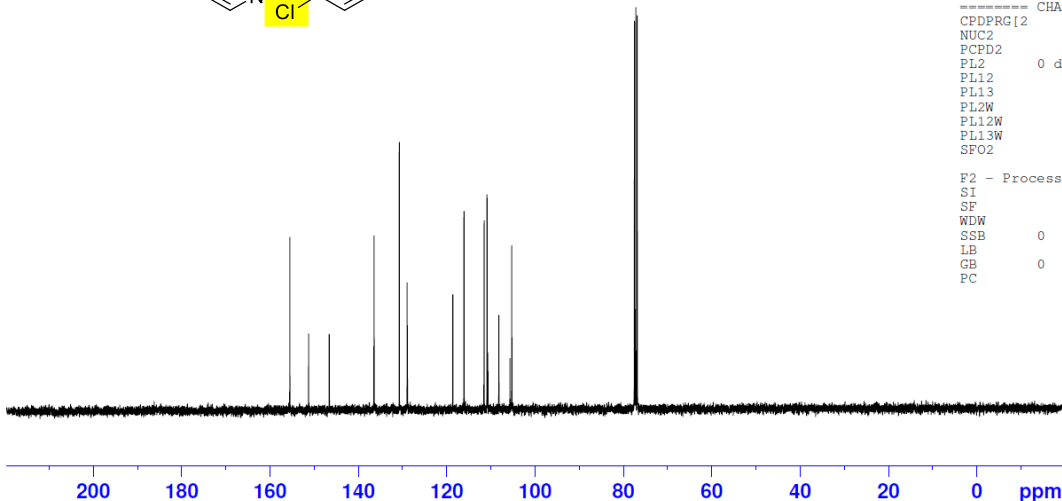

F2 - Acquisition Parameters  
INSTRUM spect  
PROBHD 5 mm PABBO BB-  
PULPROG zgpg30  
TD 65536  
SOLVENT CDC13  
NS 83  
DS 2  
SWH 24038.461 Hz  
FIDRES 0.366798 Hz  
AQ 1.3631488 sec  
RG 181  
DW 20.800 usec  
DE 6.50 usec  
TE 300.4 K  
D1 2.00000000 sec  
D11 0.03000000 sec  
TD0 1

===== CHANNEL f1 =====  
NUC1 13C  
P1 9.50 usec  
PL1 -2.00 dB  
PL1W 58.52175522 W  
SFO1 100.6228298 MHz  
===== CHANNEL f2 =====  
CPDPRG[2] waltz16  
NUC2 1H  
PCPD2 80.00 usec  
PL2 0 dB  
PL12 15.00 dB  
PL13 15.00 dB  
PL2W 11.88122272 W  
PL12W 0.37571725 W  
PL13W 0.37571725 W  
SFO2 400.1316005 MHz  
F2 - Processing parameters  
SI 32768  
SF 100.6127574 MHz  
WDW EM  
SSB 0  
LB 1.00 Hz  
GB 0  
PC 1.40

4-Chloro-3-((difluoromethyl) (pyridin-2-yl) amino)phenol 19F

-103.93

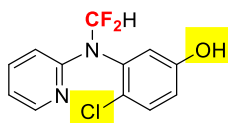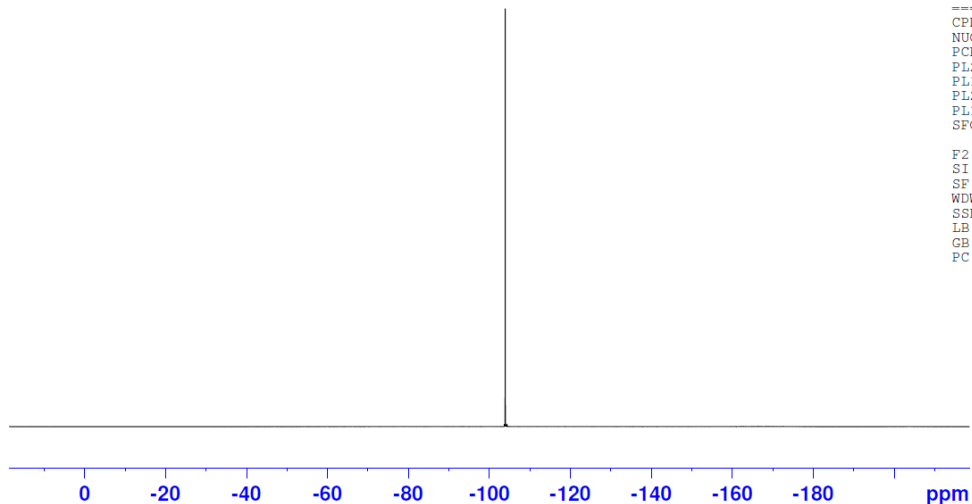

F2 - Acquisition Parameters  
INSTRUM spect  
PROBHD 5 mm PABBO BB-  
PULPROG zgfhggn  
TD 131072  
SOLVENT CDC13  
NS 16  
DS 4  
SWH 89285.711 Hz  
FIDRES 0.681196 Hz  
AQ 0.7340032 sec  
RG 1150  
DW 5.600 usec  
DE 6.50 usec  
TE 298.1 K  
D1 1.00000000 sec  
D11 0.03000000 sec  
D12 0.00002000 sec  
TD0 1

===== CHANNEL f1 =====  
NUC1 19F  
P1 14.20 usec  
PL1 -3.00 dB  
PL1W 18.69428444 W  
SFO1 376.4607164 MHz  
===== CHANNEL f2 =====  
CPDPRG[2] waltz16  
NUC2 1H  
PCPD2 80.00 usec  
PL2 0 dB  
PL12 15.00 dB  
PL13 15.00 dB  
PL2W 11.88122272 W  
PL12W 0.37571725 W  
SFO2 400.1316005 MHz  
F2 - Processing parameters  
SI 65536  
SF 376.4983660 MHz  
WDW EM  
SSB 0  
LB 0.30 Hz  
GB 0  
PC 1.00



# N-(2-Bromo-4-methylphenyl)-N-(difluoromethyl)pyridin-2-amine (product 2o)

N-(2-Bromo-4-methylphenyl)-N-(difluoromethyl)pyridin-2-amine 1H

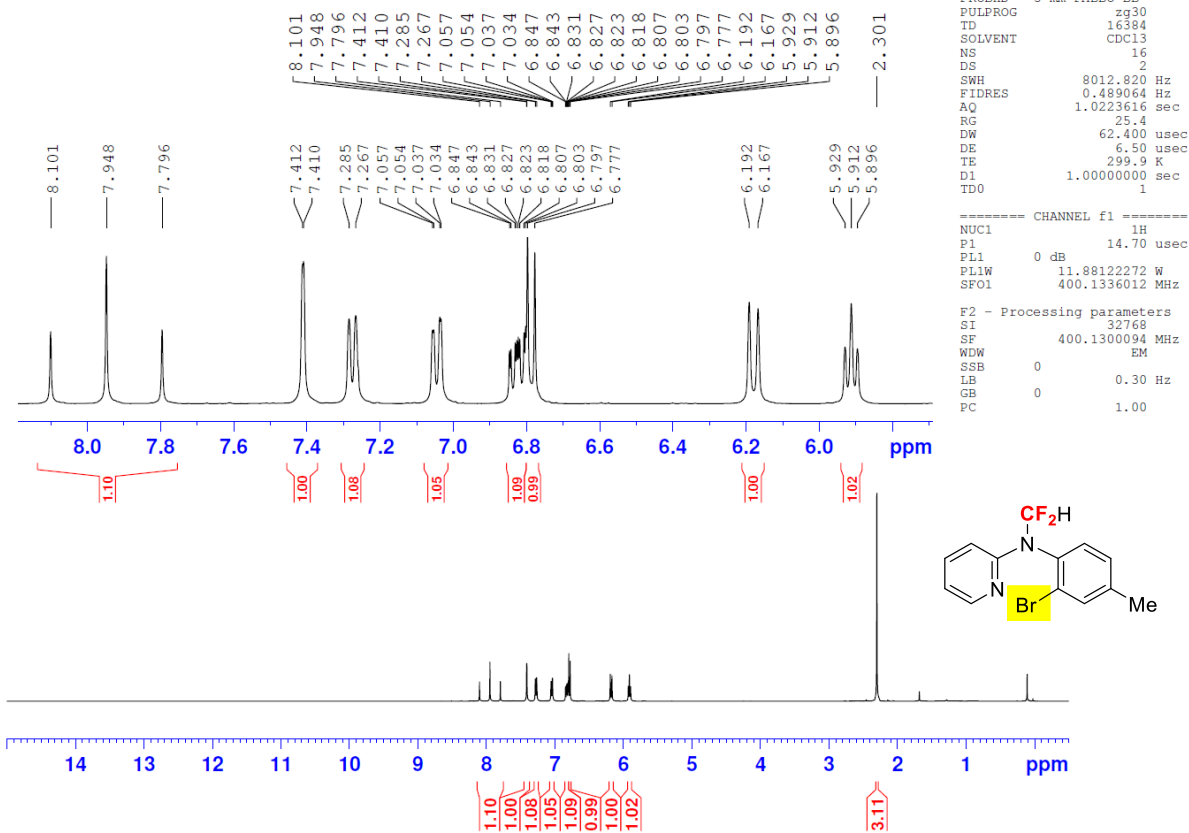

N-(2-Bromo-4-methylphenyl)-N-(difluoromethyl)pyridin-2-amine 13C

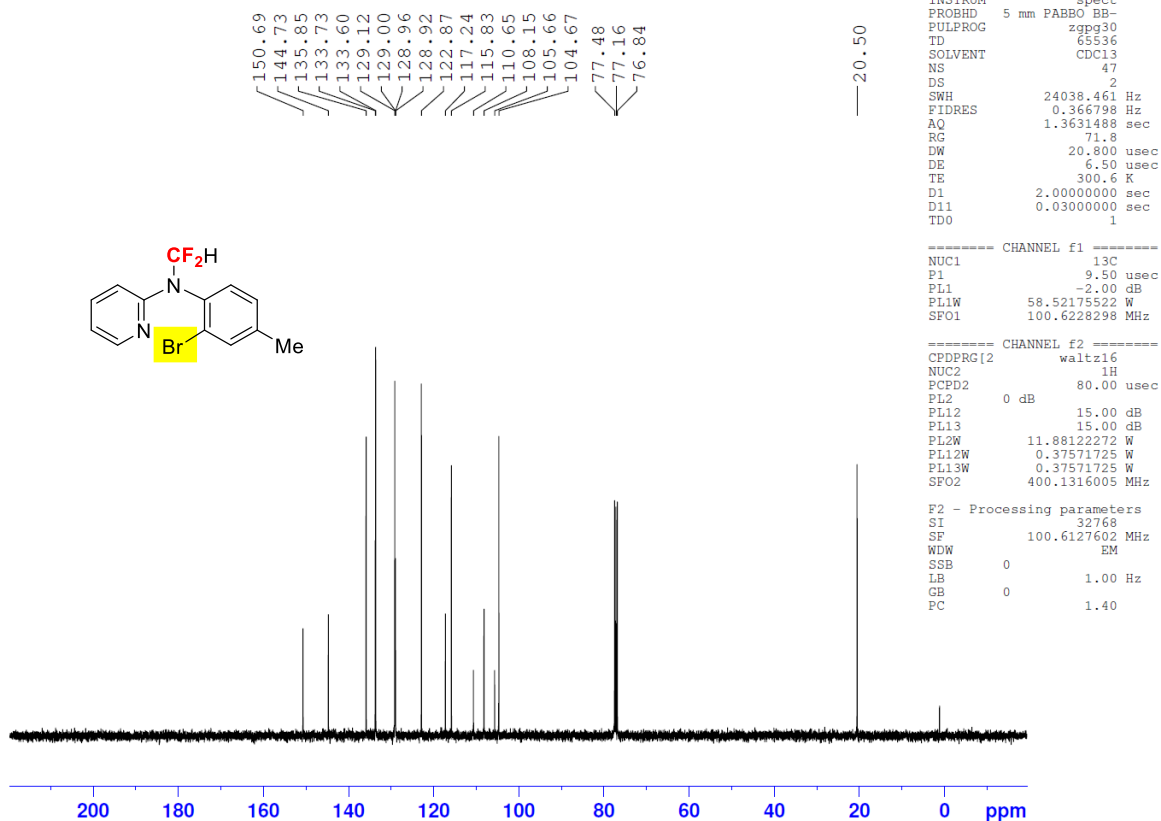

N-(2-Bromo-4-methylphenyl)-N-(difluoromethyl)pyridin-2-amine 19f

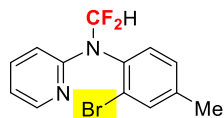

F2 - Acquisition Parameters  
 INSTRUM spect  
 PROBHD 5 mm PABBO BB-  
 PULPROG zgpg30  
 TD 131072  
 SOLVENT CDCl3  
 NS 16  
 DS 4  
 SWH 89285.711 Hz  
 FIDRES 0.681196 Hz  
 AQ 0.7340032 sec  
 RG 645  
 DW 5.600 usec  
 DE 6.50 usec  
 TE 300.1 K  
 D1 1.00000000 sec  
 D11 0.03000000 sec  
 D12 0.00002000 sec  
 TDO 1

===== CHANNEL f1 =====  
 NUC1 19F  
 P1 14.20 usec  
 PL1 -3.00 dB  
 PL1W 18.69428444 W  
 SFO1 376.4607164 MHz

===== CHANNEL f2 =====  
 CPDPRG[2] waltz16  
 NUC2 1H  
 PCPD2 80.00 usec  
 PL2 0 dB  
 PL12 15.00 dB  
 PL2W 11.88122272 W  
 PL12W 0.37571725 W  
 SFO2 400.1316005 MHz

F2 - Processing parameters  
 SI 65536  
 SF 376.4983660 MHz  
 WDW EM  
 SSB 0  
 LB 0.30 Hz  
 GB 0  
 PC 1.00

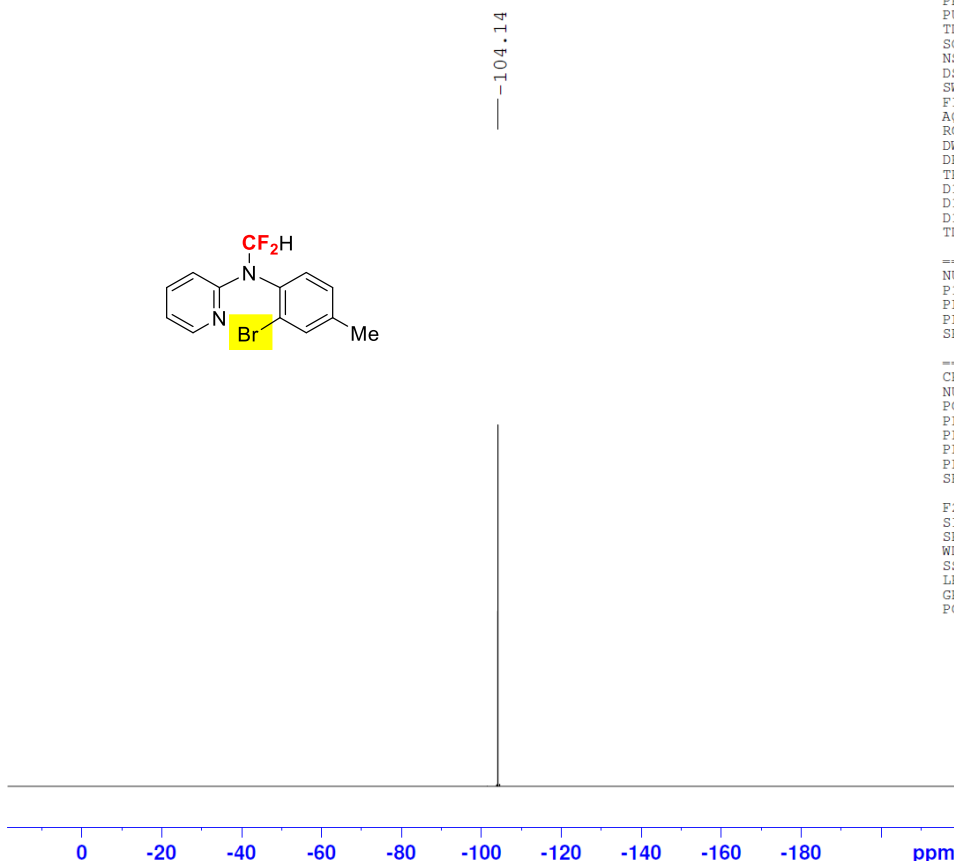

N-(5-Bromo-2-methylphenyl)-N-(difluoromethyl)pyridin-2-amine (product 2p)

N-(5-Bromo-2-methylphenyl)-N-(difluoromethyl)pyridin-2-amine 1H

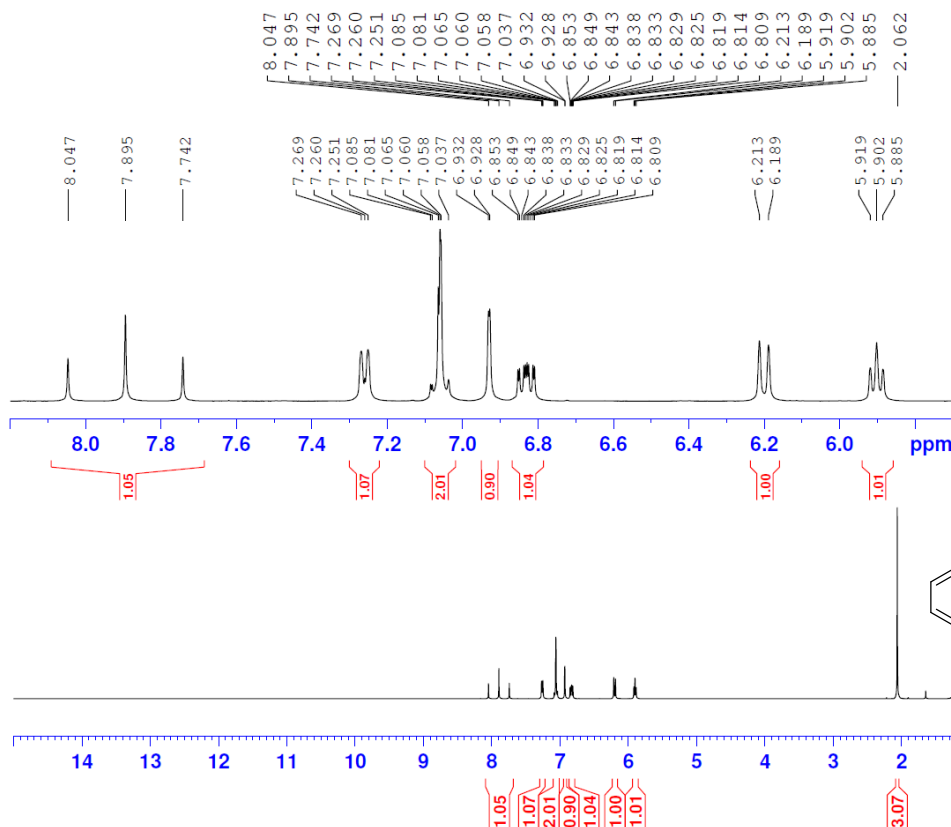

F2 - Acquisition Parameters  
 INSTRUM spect  
 PROBHD 5 mm PABBO BB-  
 PULPROG zg30  
 TD 16384  
 SOLVENT CDCl3  
 NS 16  
 DS 2  
 SWH 8012.820 Hz  
 FIDRES 0.489064 Hz  
 AQ 1.0223616 sec  
 RG 45.2  
 DW 62.400 usec  
 DE 6.50 usec  
 TE 299.3 K  
 D1 1.00000000 sec  
 TDO 1

===== CHANNEL f1 =====  
 NUC1 1H  
 P1 14.70 usec  
 PL1 0 dB  
 PL1W 11.88122272 W  
 SFO1 400.1336012 MHz

F2 - Processing parameters  
 SI 32768  
 SF 400.1300093 MHz  
 WDW EM  
 SSB 0  
 LB 0.30 Hz  
 GB 0  
 PC 1.00

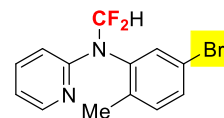

N- (5-Bromo-2-methylphenyl)-N- (difluoromethyl)pyridin-2-amine 13C

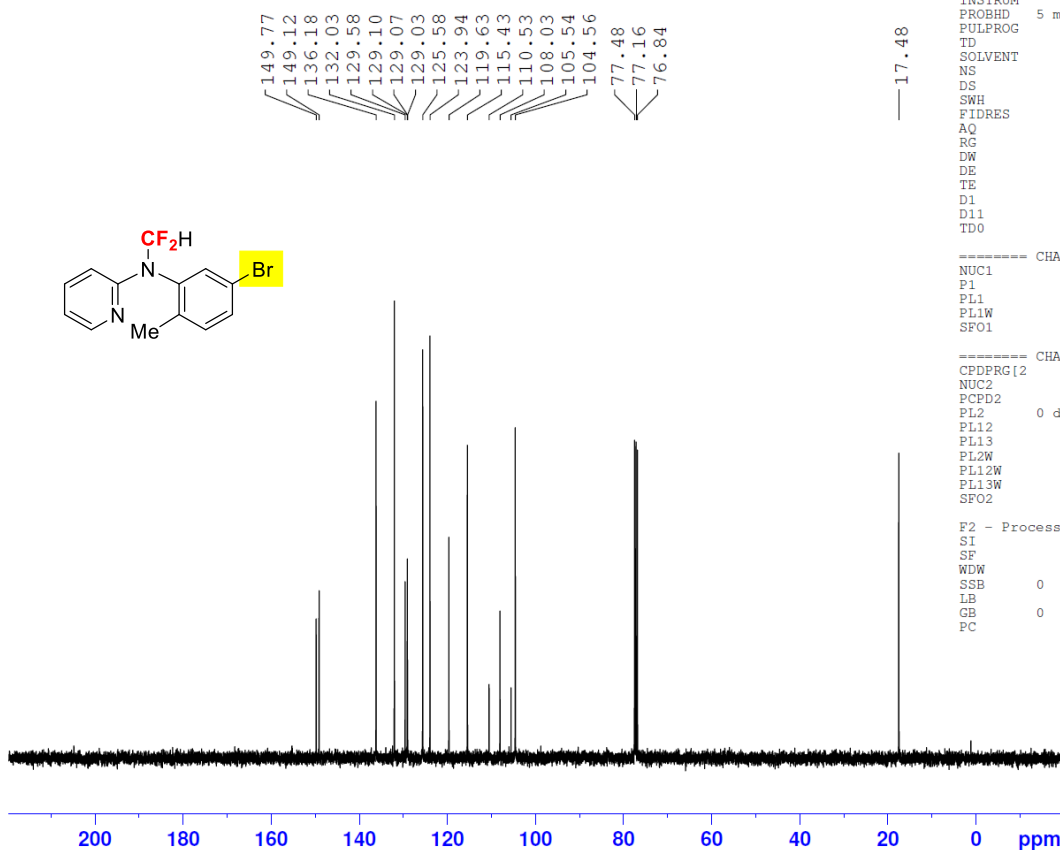

```
F2 - Acquisition Parameters
INSTRUM spect
PROBHD 5 mm PABBO BB-
PULPROG zgpg30
TD 65536
SOLVENT CDCl3
NS 38
DS 2
SWH 24038.461 Hz
FIDRES 0.366798 Hz
AQ 1.3631488 sec
RG 228
DW 20.800 usec
DE 6.50 usec
TE 300.0 K
D1 2.0000000 sec
D11 0.0300000 sec
TD0 1
```

```
===== CHANNEL f1 =====
NUC1 13C
P1 9.50 usec
PL1 -2.00 dB
PL1W 58.5217522 W
SFO1 100.6228298 MHz

===== CHANNEL f2 =====
CPDPRG[2] waltz16
NUC2 1H
PCPD2 80.00 usec
PL2 0 dB
PL12 15.00 dB
PL13 15.00 dB
PL2W 11.88122272 W
PL12W 0.37571725 W
PL13W 0.37571725 W
SFO2 400.1316005 MHz
```

```
F2 - Processing parameters
SI 32768
SF 100.6127598 MHz
WDW EM
SSB 0
LB 1.00 Hz
GB 0
PC 1.40
```

N- (5-Bromo-2-methylphenyl)-N- (difluoromethyl)pyridin-2-amine 19F

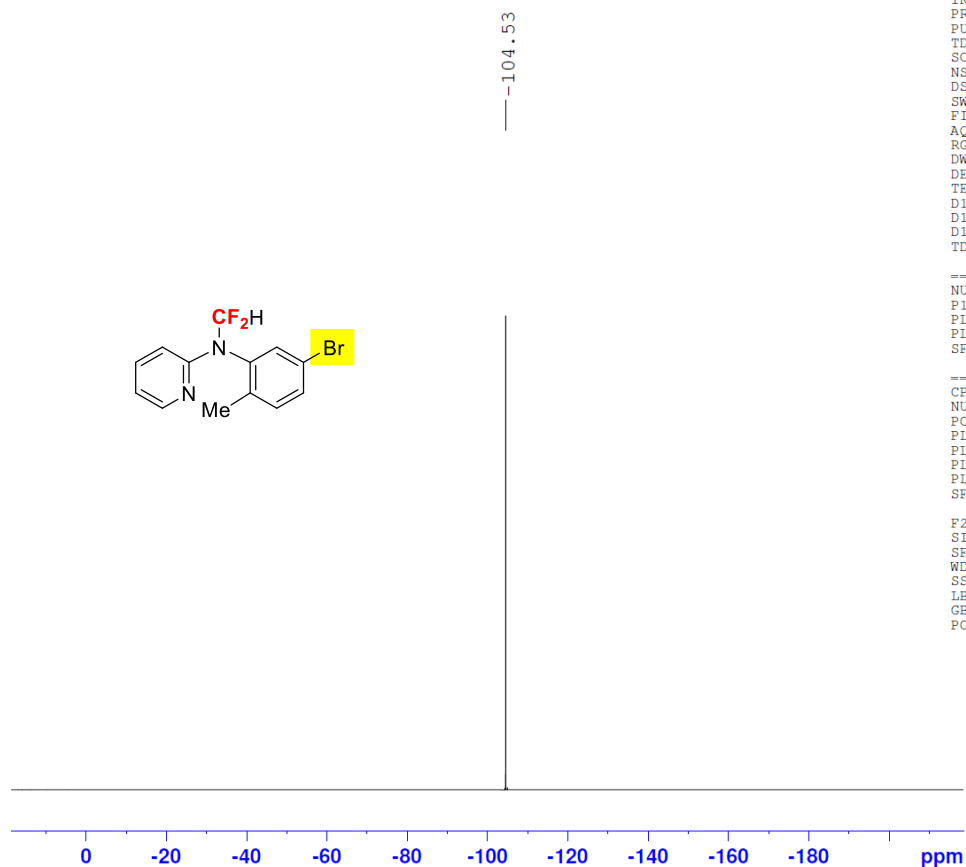

```
F2 - Acquisition Parameters
INSTRUM spect
PROBHD 5 mm PABBO BB-
PULPROG zgfhgqn
TD 131072
SOLVENT CDCl3
NS 16
DS 4
SWH 89285.711 Hz
FIDRES 0.681196 Hz
AQ 0.7340032 sec
RG 724
DW 5.600 usec
DE 6.50 usec
TE 299.5 K
D1 1.0000000 sec
D11 0.0300000 sec
D12 0.00002000 sec
TD0 1
```

```
===== CHANNEL f1 =====
NUC1 19F
P1 14.20 usec
PL1 -3.00 dB
PL1W 18.69428444 W
SFO1 376.4607164 MHz
```

```
===== CHANNEL f2 =====
CPDPRG[2] waltz16
NUC2 1H
PCPD2 80.00 usec
PL2 0 dB
PL12 15.00 dB
PL13 15.00 dB
PL2W 11.88122272 W
PL12W 0.37571725 W
SFO2 400.1316005 MHz
```

```
F2 - Processing parameters
SI 65536
SF 376.4983660 MHz
WDW EM
SSB 0
LB 0.30 Hz
GB 0
PC 1.00
```

# N-(2,3-Dichlorophenyl)-N-(difluoromethyl)pyridin-2-amine (product 2q)

N-(2,3-Dichlorophenyl)-N-(difluoromethyl)pyridin-2-amine 1H

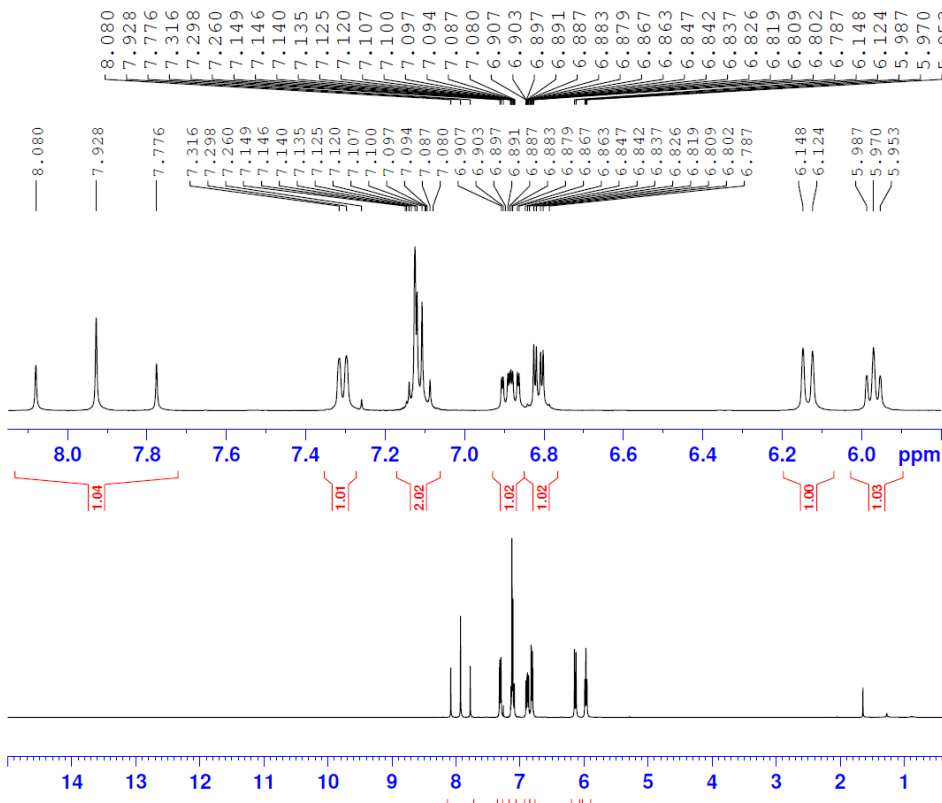

F2 - Acquisition Parameters  
 INSTRUM spect  
 PROBHD 5 mm PABBO BB-  
 PULPROG zg30  
 TD 16384  
 SOLVENT CDCl3  
 NS 16  
 DS 2  
 SWH 8012.820 Hz  
 FIDRES 0.489064 Hz  
 AQ 1.0223616 sec  
 RG 50.8  
 DW 62.400 usec  
 DE 6.50 usec  
 TE 299.8 K  
 D1 1.0000000 sec  
 TD0 1

===== CHANNEL f1 =====  
 NUC1 1H  
 P1 14.70 usec  
 PL1 0 dB  
 PL1W 11.88122272 W  
 SFO1 400.1336012 MHz

F2 - Processing parameters  
 SI 32768  
 SF 400.1300094 MHz  
 WDW EM  
 SSB 0  
 LB 0.30 Hz  
 GB 0  
 PC 1.00

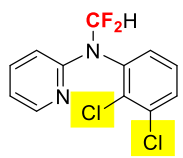

N-(2,3-Dichlorophenyl)-N-(difluoromethyl)pyridin-2-amine 13C

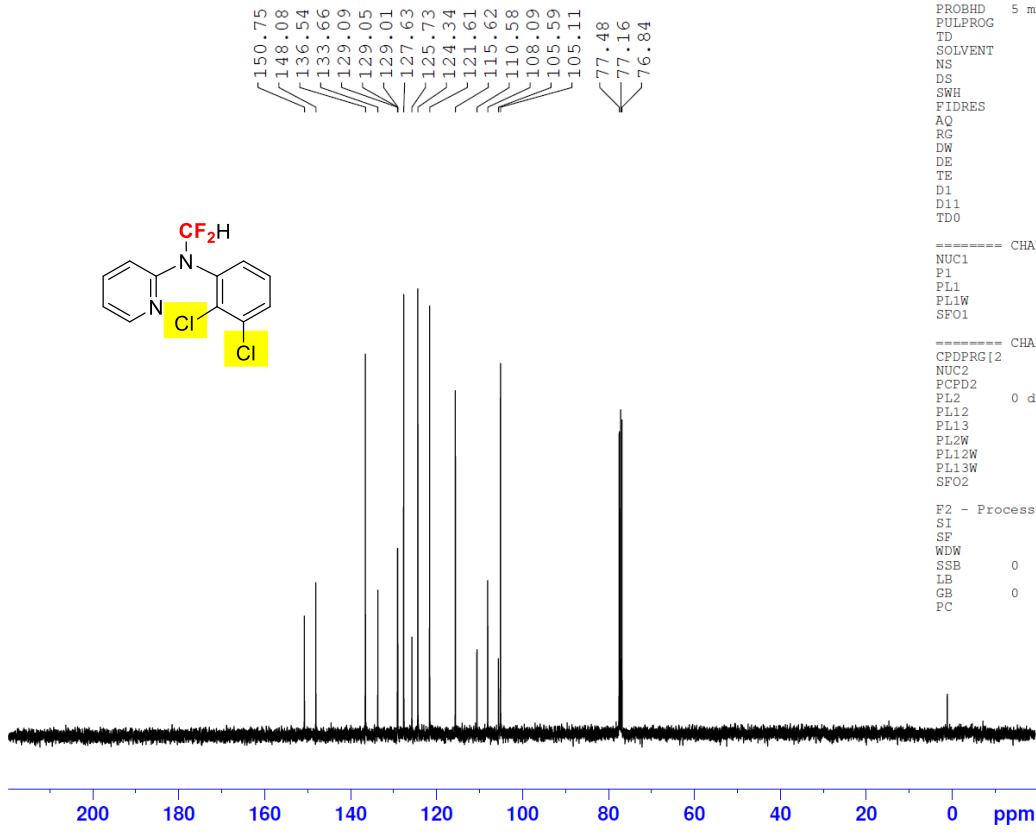

F2 - Acquisition Parameters  
 INSTRUM spect  
 PROBHD 5 mm PABBO BB-  
 PULPROG zgpg30  
 TD 65536  
 SOLVENT CDCl3  
 NS 36  
 DS 2  
 SWH 24038.461 Hz  
 FIDRES 0.366798 Hz  
 AQ 1.3631488 sec  
 RG 203  
 DW 20.800 usec  
 DE 6.50 usec  
 TE 300.2 K  
 D1 2.0000000 sec  
 D11 0.0300000 sec  
 TD0 1

===== CHANNEL f1 =====  
 NUC1 13C  
 P1 9.50 usec  
 PL1 -2.00 dB  
 PL1W 58.52175522 W  
 SFO1 100.6228298 MHz

===== CHANNEL f2 =====  
 CPDPRG[2] waltz16  
 NUC2 1H  
 PCPD2 80.00 usec  
 PL2 0 dB  
 PL12 15.00 dB  
 PL13 15.00 dB  
 PL2W 11.88122272 W  
 PL12W 0.37571725 W  
 PL13W 0.37571725 W  
 SFO2 400.1316005 MHz

F2 - Processing parameters  
 SI 32768  
 SF 100.6127589 MHz  
 WDW EM  
 SSB 0  
 LB 1.00 Hz  
 GB 0  
 PC 1.40

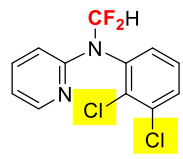

N-(2,3-Dichlorophenyl)-N-(difluoromethyl)pyridin-2-amine 19F

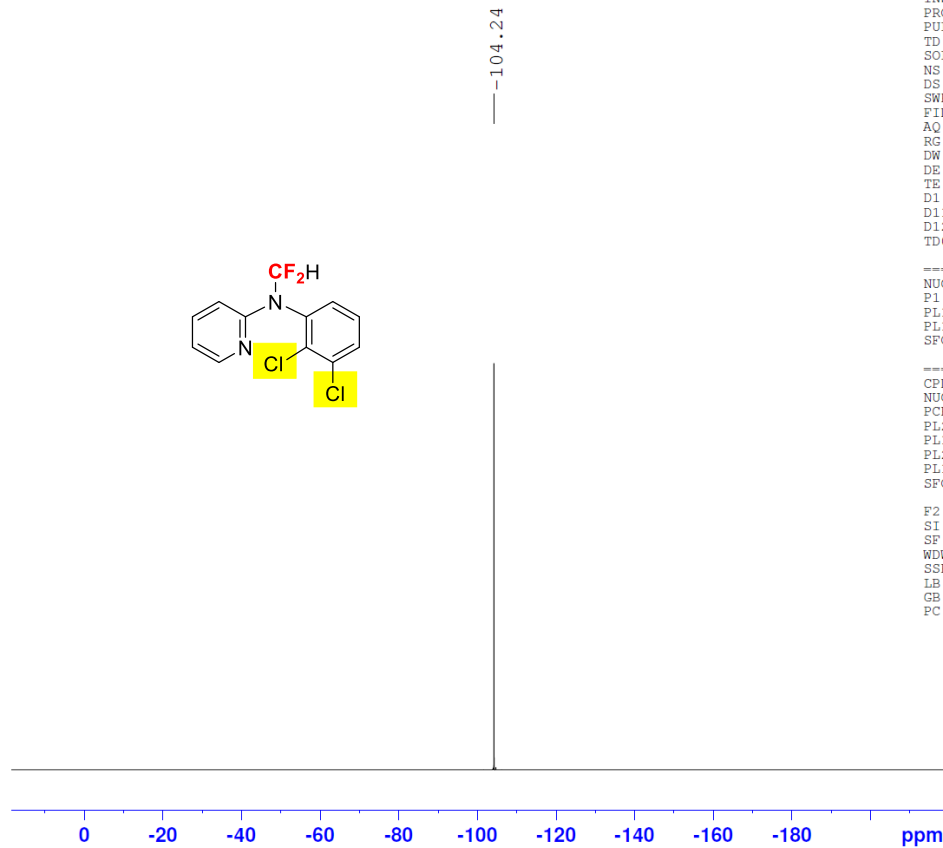

F2 - Acquisition Parameters  
 INSTRUM spect  
 PROBHD 5 mm PABBO BB-  
 PULPROG zgfgn  
 TD 131072  
 SOLVENT CDCl3  
 NS 16  
 DS 4  
 SWH 89285.711 Hz  
 FIDRES 0.681196 Hz  
 AQ 0.7340032 sec  
 RG 645  
 DW 5.600 usec  
 DE 6.50 usec  
 TE 300.0 K  
 D1 1.0000000 sec  
 D11 0.0300000 sec  
 D12 0.0000200 sec  
 TD0 1

===== CHANNEL f1 =====  
 NUC1 19F  
 P1 14.20 usec  
 PL1 -3.00 dB  
 PL1W 18.69428444 W  
 SFO1 376.4607164 MHz

===== CHANNEL f2 =====  
 CPDPRG[2] waltz16  
 NUC2 1H  
 P1 80.00 usec  
 PL2 0 dB  
 PL2W 15.00 dB  
 PL2W 11.88122272 W  
 PL12W 0.37571725 W  
 SFO2 400.1316005 MHz

F2 - Processing parameters  
 SI 65536  
 SF 376.4983660 MHz  
 WDW EM  
 SSB 0  
 LE 0.30 Hz  
 GB 0  
 PC 1.00

N-(Difluoromethyl)-N-(3,5-dimethylphenyl)pyridin-2-amine (product 2r)

N-(Difluoromethyl)-N-(3,5-dimethylphenyl)pyridin-2-amine 1H

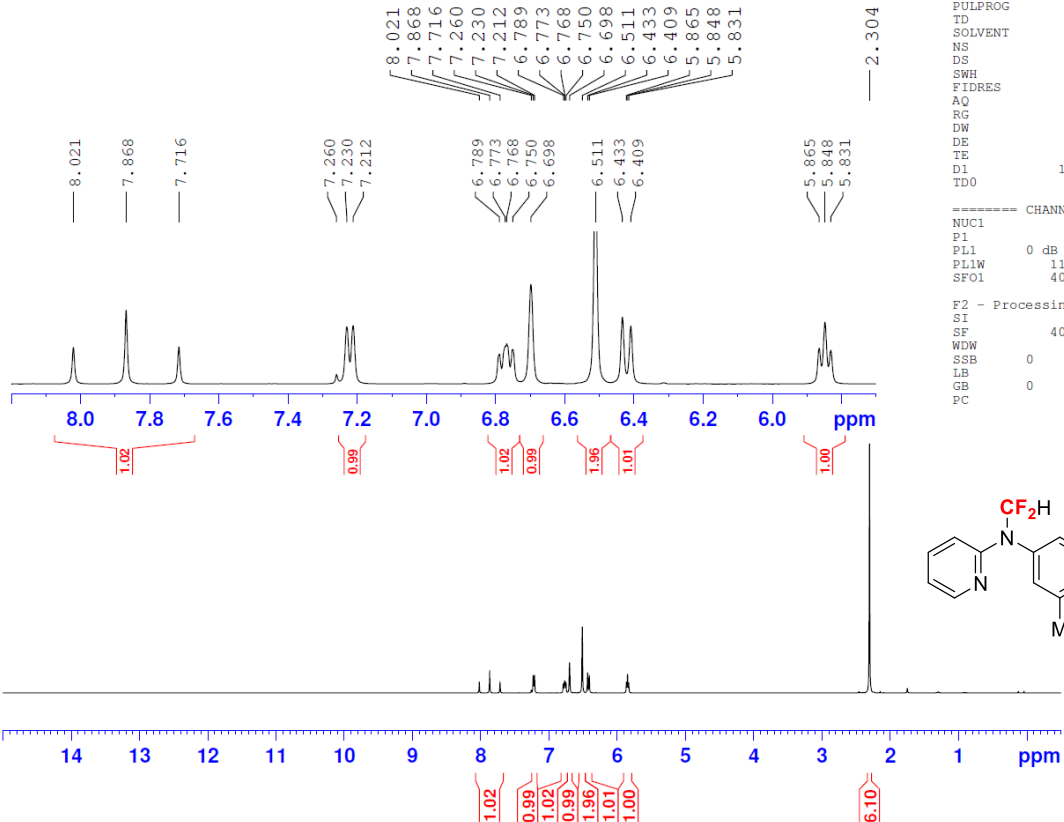

F2 - Acquisition Parameters  
 INSTRUM spect  
 PROBHD 5 mm PABBO BB-  
 PULPROG zg30  
 TD 32050  
 SOLVENT CDCl3  
 NS 16  
 DS 2  
 SWH 8012.820 Hz  
 FIDRES 0.250010 Hz  
 AQ 1.9999200 sec  
 RG 36  
 DW 62.400 usec  
 DE 6.50 usec  
 TE 298.0 K  
 D1 1.0000000 sec  
 TD0 1

===== CHANNEL f1 =====  
 NUC1 1H  
 P1 14.70 usec  
 PL1 0 dB  
 PL1W 11.88122272 W  
 SFO1 400.1336012 MHz

F2 - Processing parameters  
 SI 32768  
 SF 400.1300090 MHz  
 WDW EM  
 SSB 0  
 LB 0.30 Hz  
 GB 0  
 PC 1.00

N-(Difluoromethyl)-N-(3,5-dimethylphenyl)pyridin-2-amine 13C

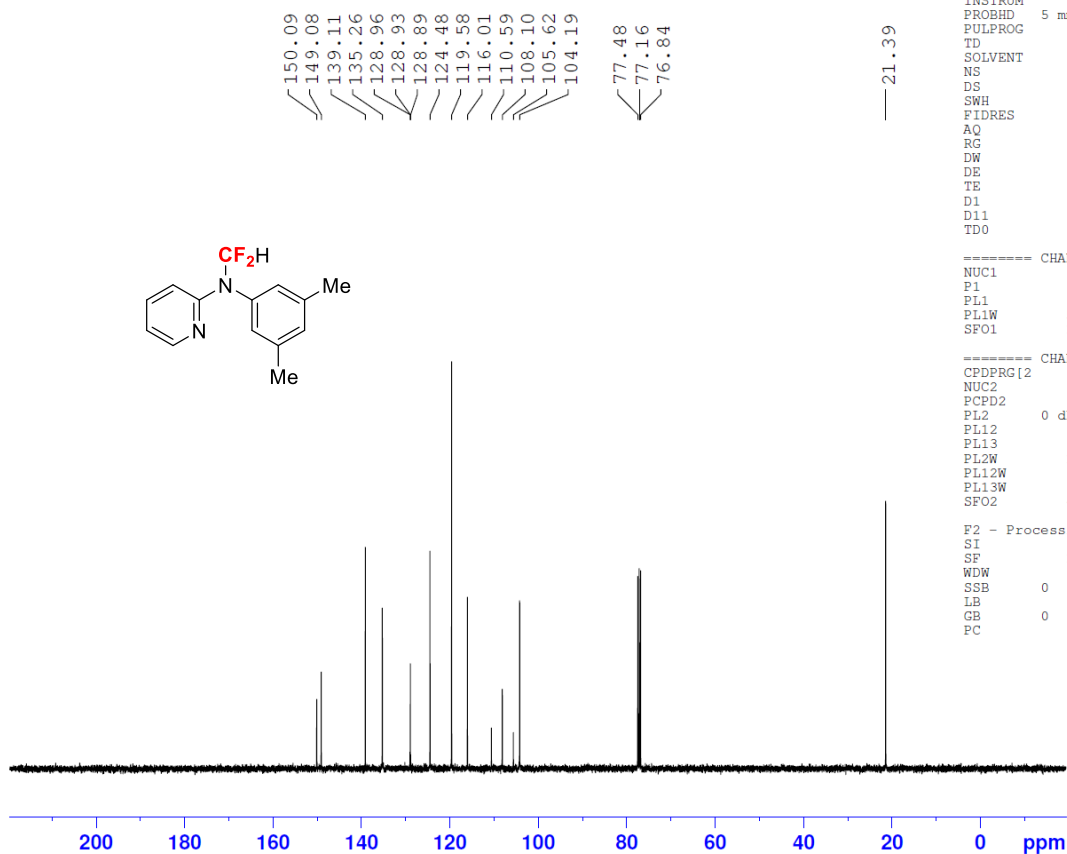

F2 - Acquisition Parameters  
 INSTRUM spect  
 PROBHD 5 mm PABBO BB-  
 PULPROG zgpg30  
 TD 65536  
 SOLVENT CDCl3  
 NS 51  
 DS 2  
 SWH 24038.461 Hz  
 FIDRES 0.366798 Hz  
 AQ 1.3631488 sec  
 RG 228  
 DW 20.800 usec  
 DE 6.50 usec  
 TE 298.4 K  
 D1 2.0000000 sec  
 D11 0.0300000 sec  
 TD0 1

===== CHANNEL f1 =====  
 NUC1 13C  
 P1 9.50 usec  
 PL1 -2.00 dB  
 PL1W 58.5217522 W  
 SFO1 100.6228298 MHz  
 ===== CHANNEL f2 =====  
 CPDPRG[2] waltz16  
 NUC2 1H  
 PCPD2 80.00 usec  
 PL2 0 dB  
 PL12 15.00 dB  
 PL13 15.00 dB  
 PL2W 11.88122272 W  
 PL12W 0.3751725 W  
 PL13W 0.3751725 W  
 SFO2 400.1316005 MHz

F2 - Processing parameters  
 SI 32768  
 SF 100.6127612 MHz  
 WDW EM  
 SSB 0  
 LB 1.00 Hz  
 GB 0  
 PC 1.40

N-(Difluoromethyl)-N-(3,5-dimethylphenyl)pyridin-2-amine 19F

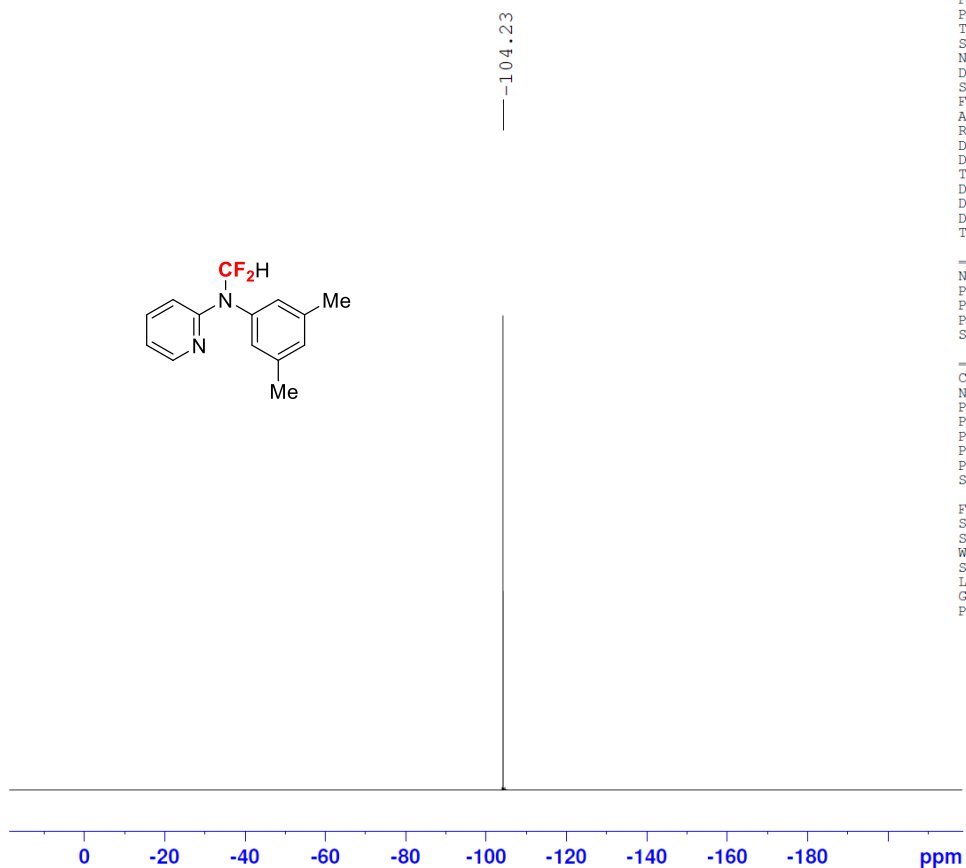

F2 - Acquisition Parameters  
 INSTRUM spect  
 PROBHD 5 mm PABBO BB-  
 PULPROG zgfhiggn  
 TD 131072  
 SOLVENT CDCl3  
 NS 16  
 DS 4  
 SWH 89285.711 Hz  
 FIDRES 0.681196 Hz  
 AQ 0.7340032 sec  
 RG 645  
 DW 5.600 usec  
 DE 6.50 usec  
 TE 298.2 K  
 D1 1.0000000 sec  
 D11 0.0300000 sec  
 D12 0.0000200 sec  
 TD0 1

===== CHANNEL f1 =====  
 NUC1 19F  
 P1 14.20 usec  
 PL1 -3.00 dB  
 PL1W 18.69428444 W  
 SFO1 376.4607164 MHz  
 ===== CHANNEL f2 =====  
 CPDPRG[2] waltz16  
 NUC2 1H  
 PCPD2 80.00 usec  
 PL2 0 dB  
 PL12 15.00 dB  
 PL2W 11.88122272 W  
 PL12W 0.3751725 W  
 SFO2 400.1316005 MHz

F2 - Processing parameters  
 SI 65536  
 SF 376.4983660 MHz  
 WDW EM  
 SSB 0  
 LB 0.30 Hz  
 GB 0  
 PC 1.00



N-(Difluoromethyl)-N-(naphthalen-1-yl)pyridin-2-amine 19F

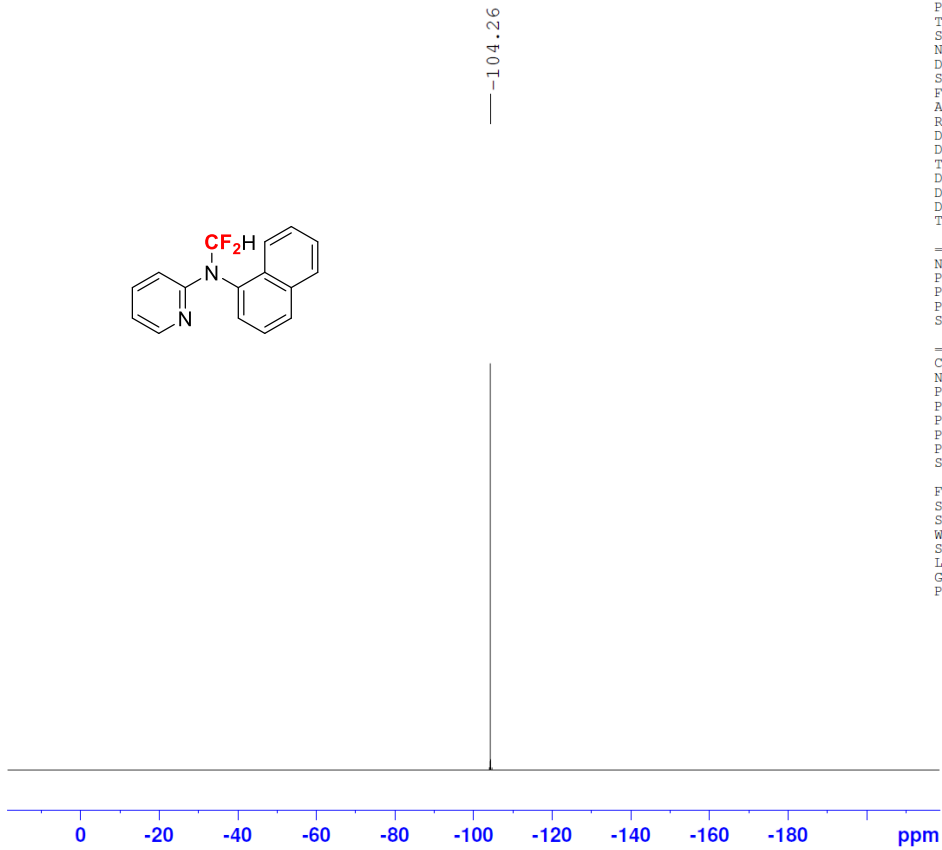

```
F2 - Acquisition Parameters
INSTRUM spect
PROBHD 5 mm PABBO BB-
PULPROG zgpg30
TD 131072
SOLVENT CDC13
NS 16
DS 4
SWH 89285.711 Hz
FIDRES 0.681196 Hz
AQ 0.7340032 sec
RG 645
DW 5.600 usec
DE 6.50 usec
TE 300.2 K
D1 1.00000000 sec
D11 0.03000000 sec
D12 0.00002000 sec
TD0 1
```

```
===== CHANNEL f1 =====
NUC1 19F
P1 14.20 usec
PL1 -3.00 dB
PL1W 18.69428444 W
SFO1 376.4607164 MHz
```

```
===== CHANNEL f2 =====
CPDPRG2 waltz16
NUC2 1H
PCPD2 80.00 usec
PL2 0 dB
PL12 15.00 dB
PL2W 11.88122272 W
PL12W 0.37571725 W
SFO2 400.1316005 MHz
```

```
F2 - Processing parameters
SI 65536
SF 376.4983660 MHz
WDW EM
SSB 0
LB 0.30 Hz
GB 0
PC 1.00
```

N-(Difluoromethyl)-N-phenyl-5-(trifluoromethyl)pyridin-2-amine (product 2t)

N-(Difluoromethyl)-N-phenyl-5-(trifluoromethyl)pyridin-2-amine 1H

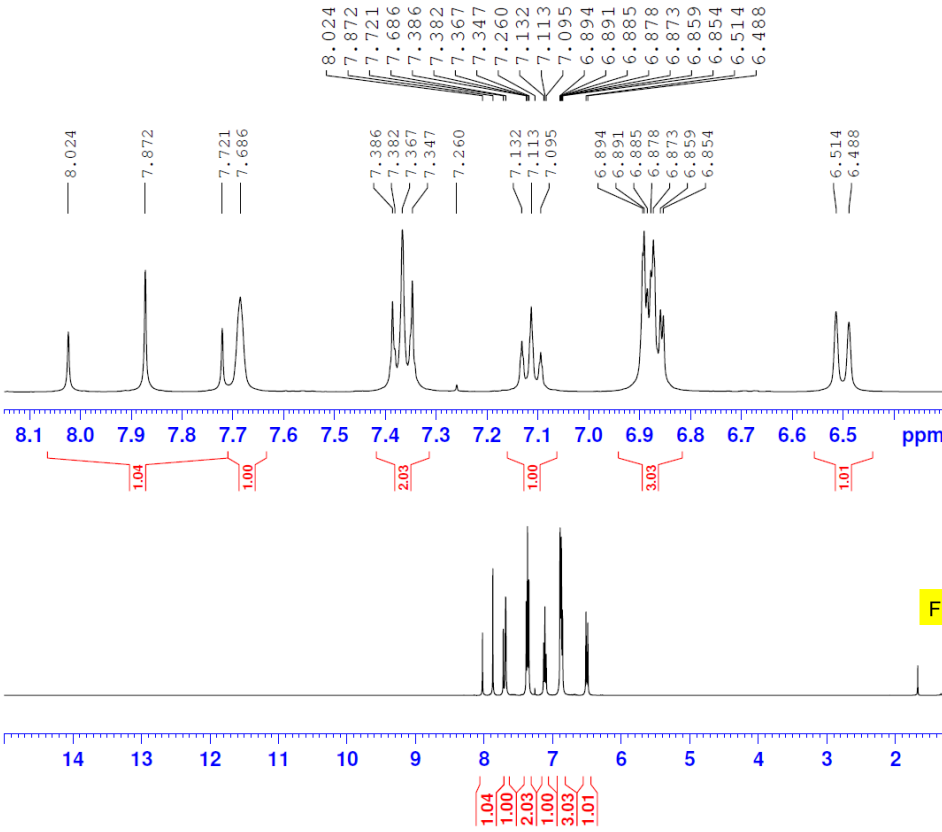

```
F2 - Acquisition Parameters
INSTRUM spect
PROBHD 5 mm PABBO BB-
PULPROG zg30
TD 16384
SOLVENT CDC13
NS 16
DS 2
SWH 8012.820 Hz
FIDRES 0.489064 Hz
AQ 1.0223616 sec
RG 25.4
DW 62.400 usec
DE 6.50 usec
TE 299.4 K
D1 1.00000000 sec
TD0 1
```

```
===== CHANNEL f1 =====
NUC1 1H
P1 14.70 usec
PL1 0 dB
PL1W 11.88122272 W
SFO1 400.1336012 MHz
```

```
F2 - Processing parameters
SI 32768
SF 400.1300091 MHz
WDW EM
SSB 0
LB 0.30 Hz
GB 0
PC 1.00
```



N- (Difluoromethyl)-N-phenyl-5- (trifluoromethyl)pyridin-2-amine 13C

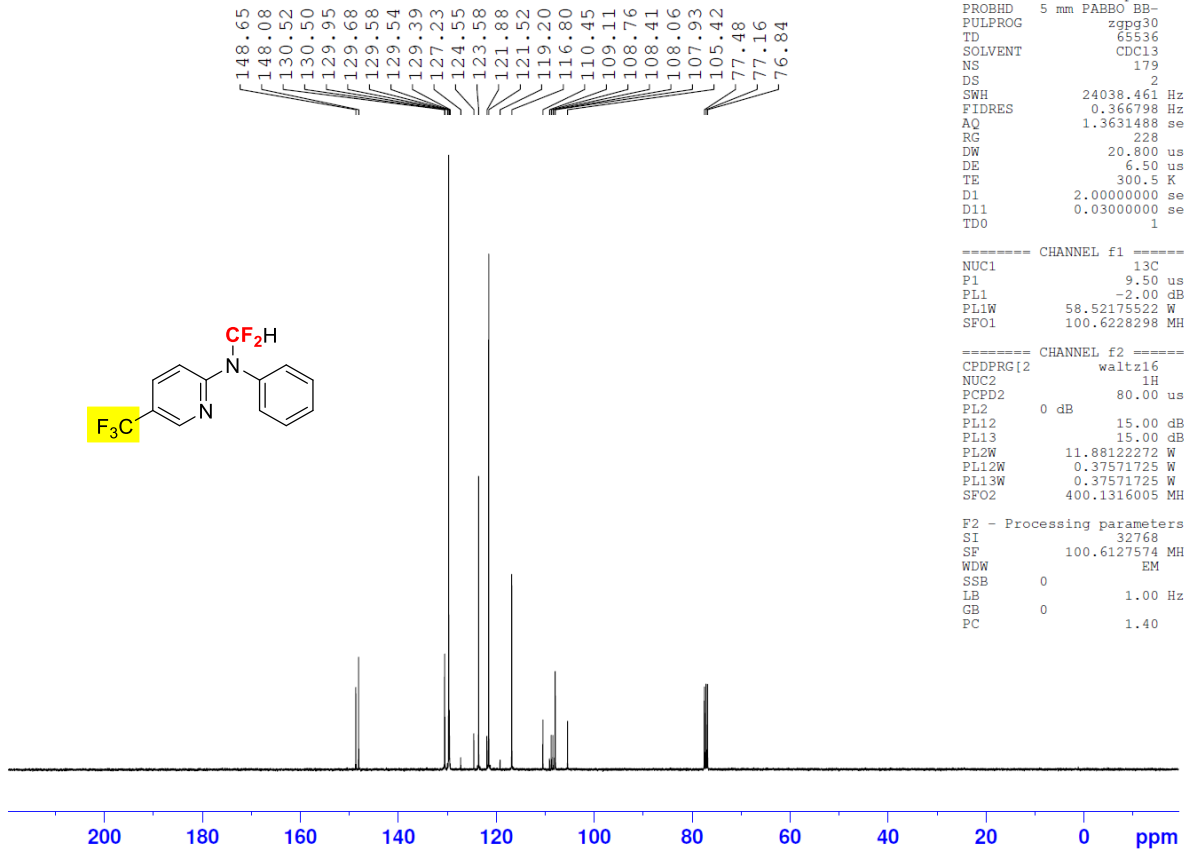

F2 - Acquisition Parameters  
 INSTRUM spect  
 PROBHD 5 mm PABBO BB-  
 PULPROG zgpg30  
 TD 65536  
 SOLVENT CDCl3  
 NS 179  
 DS 2  
 SWH 24038.461 Hz  
 FIDRES 0.366798 Hz  
 AQ 1.3631488 sec  
 RG 228  
 DW 20.800 usec  
 DE 6.50 usec  
 TE 300.5 K  
 D1 2.00000000 sec  
 D11 0.03000000 sec  
 TDO 1

===== CHANNEL f1 =====  
 NUC1 13C  
 P1 9.50 usec  
 PL1 -2.00 dB  
 PL1W 58.5217522 W  
 SFO1 100.6228298 MHz

===== CHANNEL f2 =====  
 CPDPRG[2] waltz16  
 NUC2 1H  
 PCPD2 80.00 usec  
 PL2 0 dB  
 PL12 15.00 dB  
 PL13 15.00 dB  
 PL2W 11.88122272 W  
 PL12W 0.37571725 W  
 PL13W 0.37571725 W  
 SFO2 400.1316005 MHz

F2 - Processing parameters  
 SI 32768  
 SF 100.6127574 MHz  
 WDW EM  
 SSB 0  
 LB 1.00 Hz  
 GB 0  
 PC 1.40

N- (Difluoromethyl)-N-phenyl-5- (trifluoromethyl)pyridin-2-amine 19F

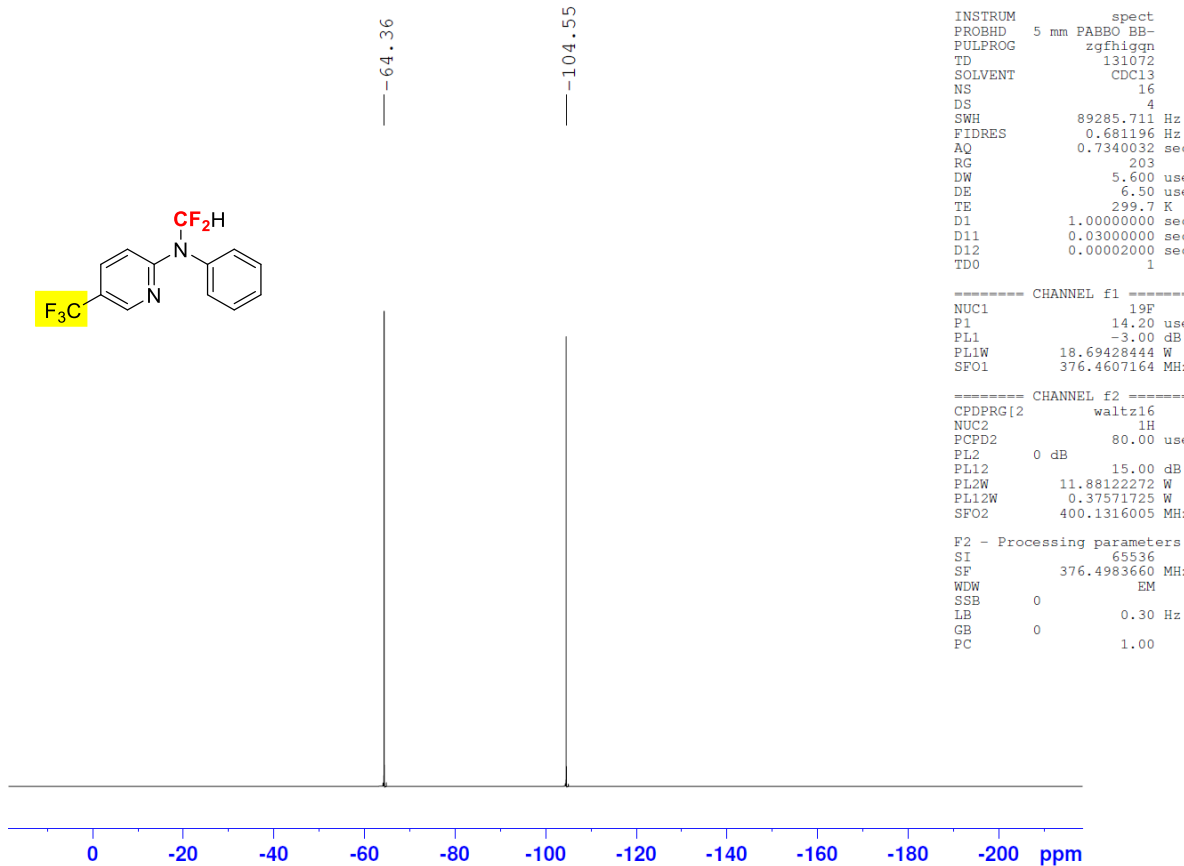

F2 - Acquisition Parameters  
 INSTRUM spect  
 PROBHD 5 mm PABBO BB-  
 PULPROG zgfhigqn  
 TD 131072  
 SOLVENT CDCl3  
 NS 16  
 DS 4  
 SWH 89285.711 Hz  
 FIDRES 0.681196 Hz  
 AQ 0.7340032 sec  
 RG 203  
 DW 5.600 usec  
 DE 6.50 usec  
 TE 299.7 K  
 D1 1.00000000 sec  
 D11 0.03000000 sec  
 D12 0.00002000 sec  
 TDO 1

===== CHANNEL f1 =====  
 NUC1 19F  
 P1 14.20 usec  
 PL1 -3.00 dB  
 PL1W 18.69428444 W  
 SFO1 376.4607164 MHz

===== CHANNEL f2 =====  
 CPDPRG[2] waltz16  
 NUC2 1H  
 PCPD2 80.00 usec  
 PL2 0 dB  
 PL12 15.00 dB  
 PL2W 11.88122272 W  
 PL12W 0.37571725 W  
 SFO2 400.1316005 MHz

F2 - Processing parameters  
 SI 65536  
 SF 376.4983660 MHz  
 WDW EM  
 SSB 0  
 LB 0.30 Hz  
 GB 0  
 PC 1.00

# N-(Difluoromethyl)-5-nitro-N-phenylpyridin-2-amine (product 2u)

N-(Difluoromethyl)-5-nitro-N-phenylpyridin-2-amine 1H

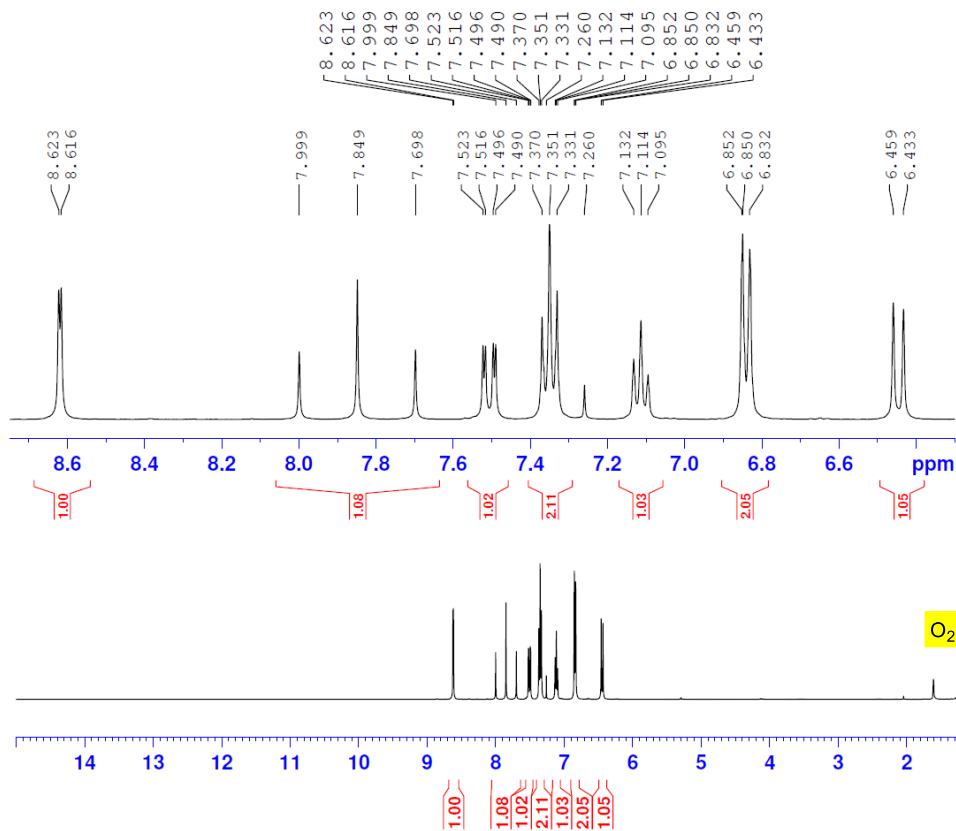

```

F2 - Acquisition Parameters
INSTRUM spect
PROBHD 5 mm PABBO BB-
PULPROG zg30
TD 16384
SOLVENT CDCl3
NS 2
DS 2
SWH 8012.820 Hz
FIDRES 0.489064 Hz
AQ 1.0223616 sec
RG 71.8
DW 62.400 usec
DE 6.50 usec
TE 298.9 K
D1 1.0000000 sec
TD0 1

===== CHANNEL f1 =====
NUC1 1H
P1 14.70 usec
PL1 0 dB
PL1W 11.88122272 W
SFO1 400.1336012 MHz

F2 - Processing parameters
SI 32768
SF 400.1300097 MHz
WDW EM
SSB 0
LB 0.30 Hz
GB 0
PC 1.00
    
```

N-(Difluoromethyl)-5-nitro-N-phenylpyridin-2-amine 13C

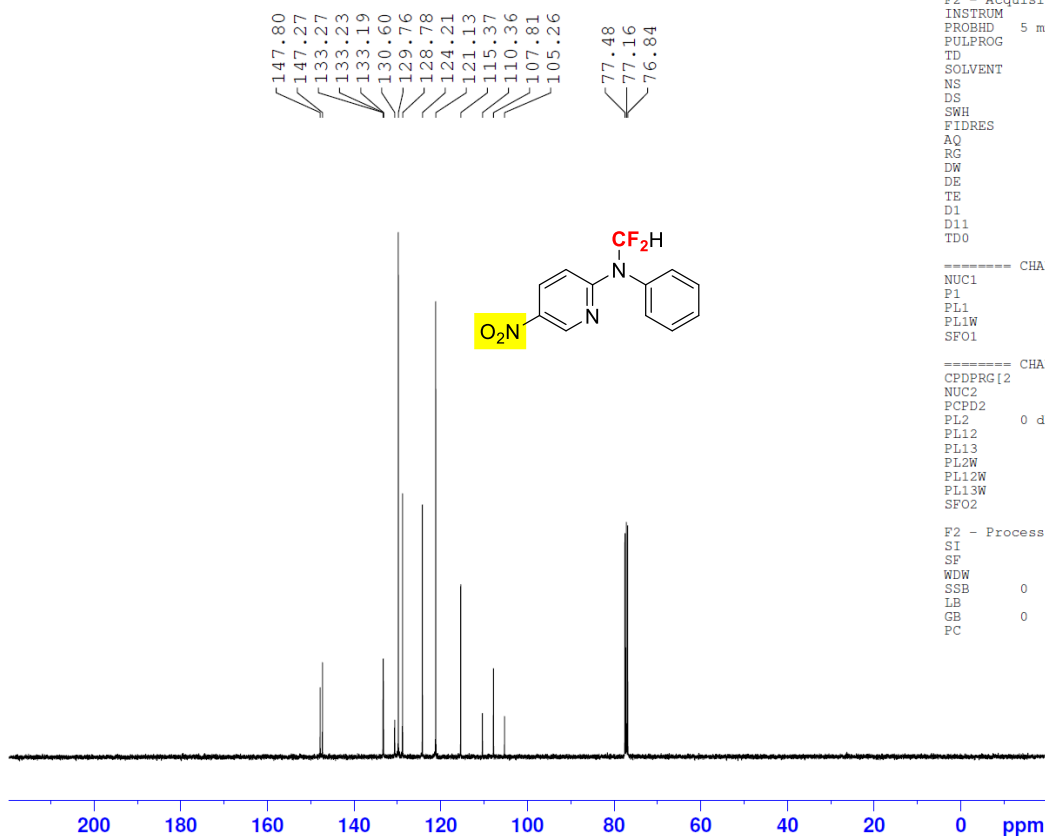

```

F2 - Acquisition Parameters
INSTRUM spect
PROBHD 5 mm PABBO BB-
PULPROG zgpg30
TD 65536
SOLVENT CDCl3
NS 318
DS 2
SWH 24038.461 Hz
FIDRES 0.366798 Hz
AQ 1.3631488 sec
RG 228
DW 20.800 usec
DE 6.50 usec
TE 299.1 K
D1 2.0000000 sec
D11 0.0300000 sec
TD0 1

===== CHANNEL f1 =====
NUC1 13C
P1 9.50 usec
PL1 -2.00 dB
PL1W 58.52175522 W
SFO1 100.6228298 MHz

===== CHANNEL f2 =====
CPDPRG[2] waltz16
NUC2 1H
PCPD2 80.00 usec
PL2 0 dB
PL12 15.00 dB
PL13 15.00 dB
PL2W 11.88122272 W
PL12W 0.37571725 W
PL13W 0.37571725 W
SFO2 400.1316005 MHz

F2 - Processing parameters
SI 32768
SF 100.6127582 MHz
WDW EM
SSB 0
LB 1.00 Hz
GB 0
PC 1.40
    
```

N-(Difluoromethyl)-5-nitro-N-phenylpyridin-2-amine 19F

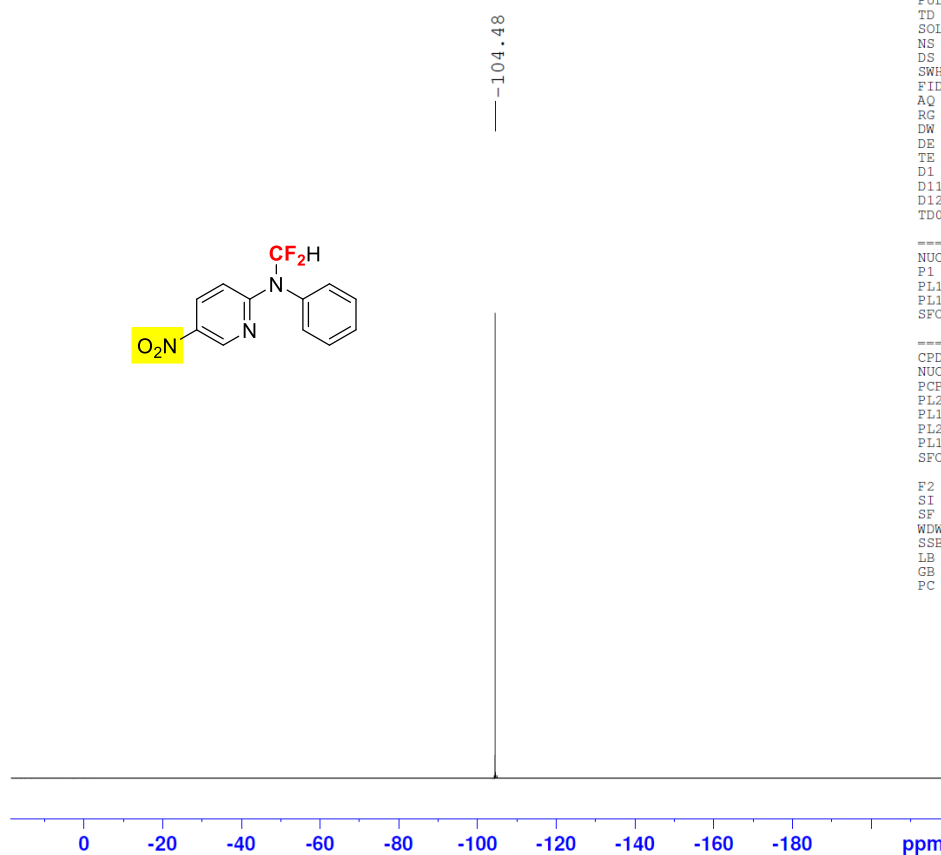

F2 - Acquisition Parameters  
 INSTRUM spect  
 PROBH 5 mm PABBO BB-  
 PULPROG zgfhggn  
 TD 131072  
 SOLVENT CDCl3  
 NS 16  
 DS 4  
 SWH 89285.711 Hz  
 FIDRES 0.681196 Hz  
 AQ 0.7340032 sec  
 RG 912  
 DW 5.600 usec  
 DE 6.50 usec  
 TE 299.6 K  
 D1 1.00000000 sec  
 D11 0.03000000 sec  
 D12 0.00002000 sec  
 TDO 1

----- CHANNEL f1 -----  
 NUC1 19F  
 P1 14.20 usec  
 PL1 -3.00 dB  
 PL1W 18.69428444 W  
 SFO1 376.4607164 MHz

----- CHANNEL f2 -----  
 CPDPRG2 waltz16  
 NUC2 1H  
 PCDP2 80.00 usec  
 PL2 0 dB  
 PL12 15.00 dB  
 PL2W 11.88122272 W  
 PL12W 0.37571725 W  
 SFO2 400.1316005 MHz

F2 - Processing parameters  
 SI 65536  
 SF 376.4983660 MHz  
 WDW EM  
 SSB 0  
 LB 0.30 Hz  
 GB 0  
 PC 1.00

N-(3-Chlorophenyl)-N-(difluoromethyl)-3-methylpyridin-2-amine (product 2v)

N-(3-Chlorophenyl)-N-(difluoromethyl)-3-methylpyridin-2-amine 1H

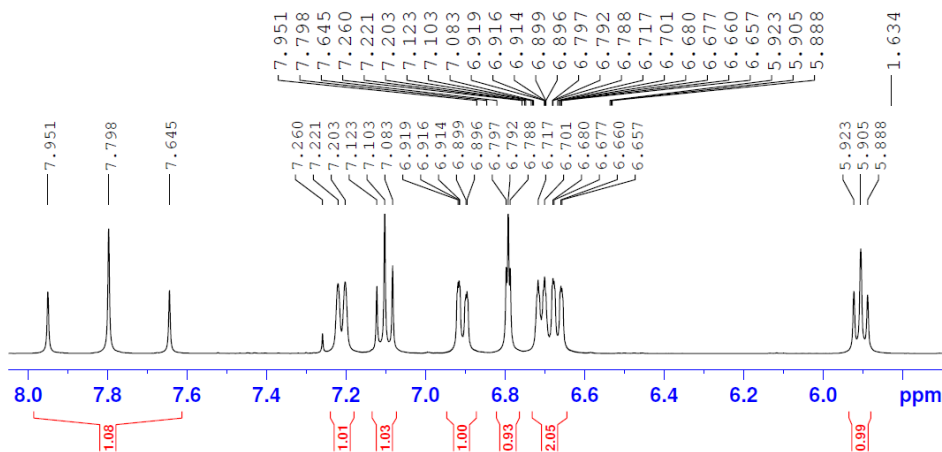

F2 - Acquisition Parameters  
 INSTRUM spect  
 PROBH 5 mm PABBO BB-  
 PULPROG zg30  
 TD 16384  
 SOLVENT CDCl3  
 NS 16  
 DS 2  
 SWH 8012.820 Hz  
 FIDRES 0.489064 Hz  
 AQ 1.0223616 sec  
 RG 50.8  
 DW 62.400 usec  
 DE 6.50 usec  
 TE 299.5 K  
 D1 1.00000000 sec  
 TDO 1

----- CHANNEL f1 -----  
 NUC1 1H  
 P1 14.70 usec  
 PL1 0 dB  
 PL1W 11.88122272 W  
 SFO1 400.1336012 MHz

F2 - Processing parameters  
 SI 32768  
 SF 400.1300097 MHz  
 WDW EM  
 SSB 0  
 LB 0.30 Hz  
 GB 0  
 PC 1.00

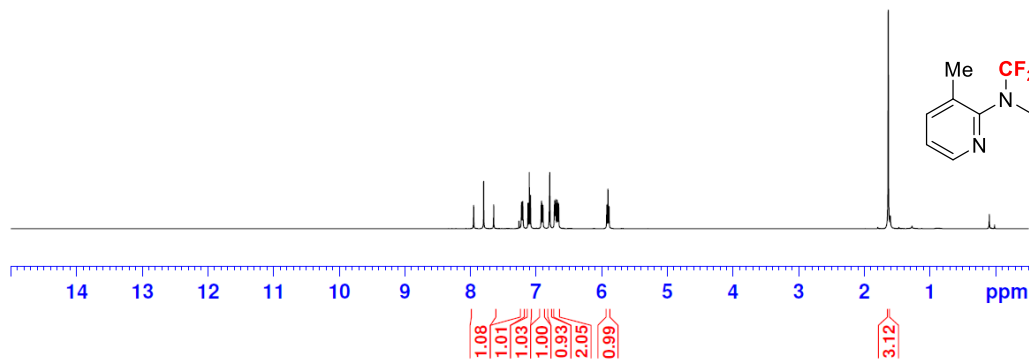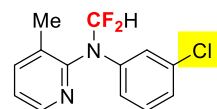

N- (3-Chlorophenyl)-N- (difluoromethyl)-3-methylpyridin-2-amine 13C

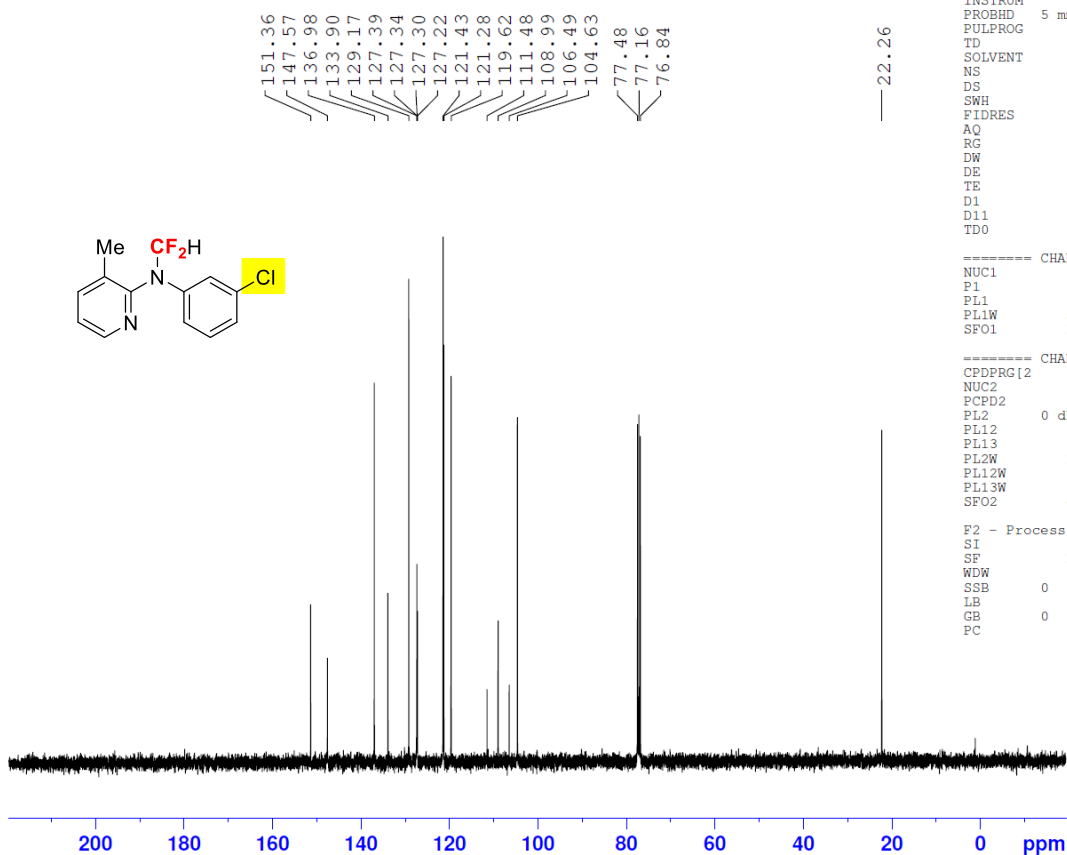

F2 - Acquisition Parameters  
INSTRUM spect  
PROBHD 5 mm PABBO BB-  
PULPROG zgpg30  
TD 65536  
SOLVENT CDC13  
NS 52  
DS 2  
SWH 24038.461 Hz  
FIDRES 0.366798 Hz  
AQ 1.3631488 sec  
RG 161  
DW 20.800 usec  
DE 6.50 usec  
TE 299.9 K  
D1 2.0000000 sec  
D11 0.0300000 sec  
TD0 1

===== CHANNEL f1 =====  
NUC1 13C  
P1 9.50 usec  
PL1 -2.00 dB  
PL1W 58.52175522 W  
SFO1 100.6228298 MHz

===== CHANNEL f2 =====  
CPDPRG[2] waltz16  
NUC2 1H  
PCPD2 80.00 usec  
PL2 0 dB  
PL12 15.00 dB  
PL13 15.00 dB  
PL2W 11.88122272 W  
PL12W 0.37571725 W  
PL13W 0.37571725 W  
SFO2 400.1316005 MHz

F2 - Processing parameters  
SI 32768  
SF 100.6127568 MHz  
WDW EM  
SSB 0  
LB 1.00 Hz  
GB 0  
PC 1.40

N- (3-Chlorophenyl)-N- (difluoromethyl)-3-methylpyridin-2-amine 19F

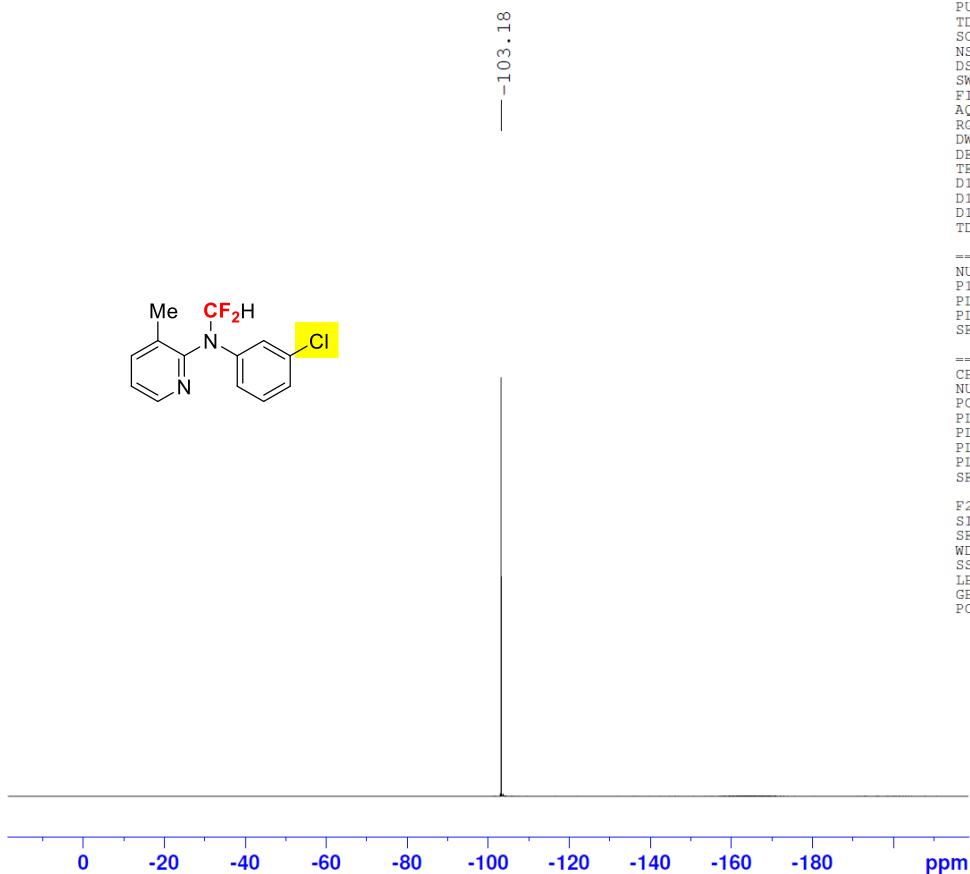

F2 - Acquisition Parameters  
INSTRUM spect  
PROBHD 5 mm PABBO BB-  
PULPROG zgfhigqn  
TD 131072  
SOLVENT CDC13  
NS 16  
DS 4  
SWH 89285.711 Hz  
FIDRES 0.681196 Hz  
AQ 0.7340032 sec  
RG 812  
DW 5.600 usec  
DE 6.50 usec  
TE 299.9 K  
D1 1.0000000 sec  
D11 0.0300000 sec  
D12 0.0000200 sec  
TD0 1

===== CHANNEL f1 =====  
NUC1 19F  
P1 14.20 usec  
PL1 -3.00 dB  
PL1W 18.69428444 W  
SFO1 376.4607164 MHz

===== CHANNEL f2 =====  
CPDPRG[2] waltz16  
NUC2 1H  
PCPD2 80.00 usec  
PL2 0 dB  
PL12 15.00 dB  
PL2W 11.88122272 W  
PL12W 0.37571725 W  
SFO2 400.1316005 MHz

F2 - Processing parameters  
SI 65536  
SF 376.4983660 MHz  
WDW EM  
SSB 0  
LB 0.30 Hz  
GB 0  
PC 1.00



N-(4-Chlorophenyl)-N-(difluoromethyl)-3-methylpyridin-2-amine 19F

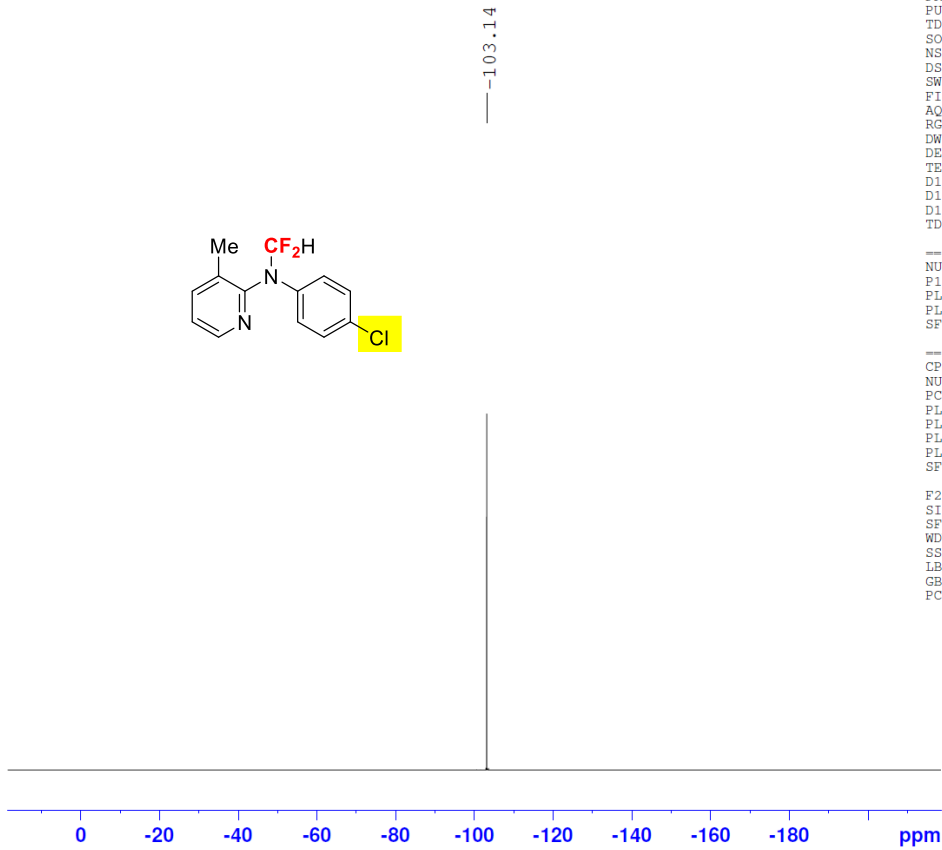

F2 - Acquisition Parameters  
 INSTRUM spect  
 PROBHD 5 mm PABBO BB-  
 PULPROG zgfhggn  
 TD 131072  
 SOLVENT CDCl3  
 NS 16  
 DS 4  
 SWH 89285.711 Hz  
 FIDRES 0.681196 Hz  
 AQ 0.7340032 sec  
 RG 912  
 DW 5.600 usec  
 DE 6.50 usec  
 TE 299.4 K  
 D1 1.00000000 sec  
 D11 0.03000000 sec  
 D12 0.00002000 sec  
 TDO 1

----- CHANNEL f1 -----  
 NUC1 19F  
 P1 14.20 usec  
 PL1 -3.00 dB  
 PL1W 18.69428444 W  
 SFO1 376.4607164 MHz

----- CHANNEL f2 -----  
 CPDPRG[2] waltz16  
 NUC2 1H  
 PCPD2 80.00 usec  
 PL2 0 dB  
 PL12 15.00 dB  
 PL2W 11.88122272 W  
 PL12W 0.37571725 W  
 SFO2 400.1316005 MHz

F2 - Processing parameters  
 SI 65536  
 SF 376.4983660 MHz  
 WDW EM  
 SSB 0  
 LB 0.30 Hz  
 GB 0  
 PC 1.00

N-(2-Chlorophenyl)-N-(difluoromethyl)-6-methylpyridin-2-amine (product 2x)

N-(2-Chlorophenyl)-N-(difluoromethyl)-6-methylpyridin-2-amine 1H

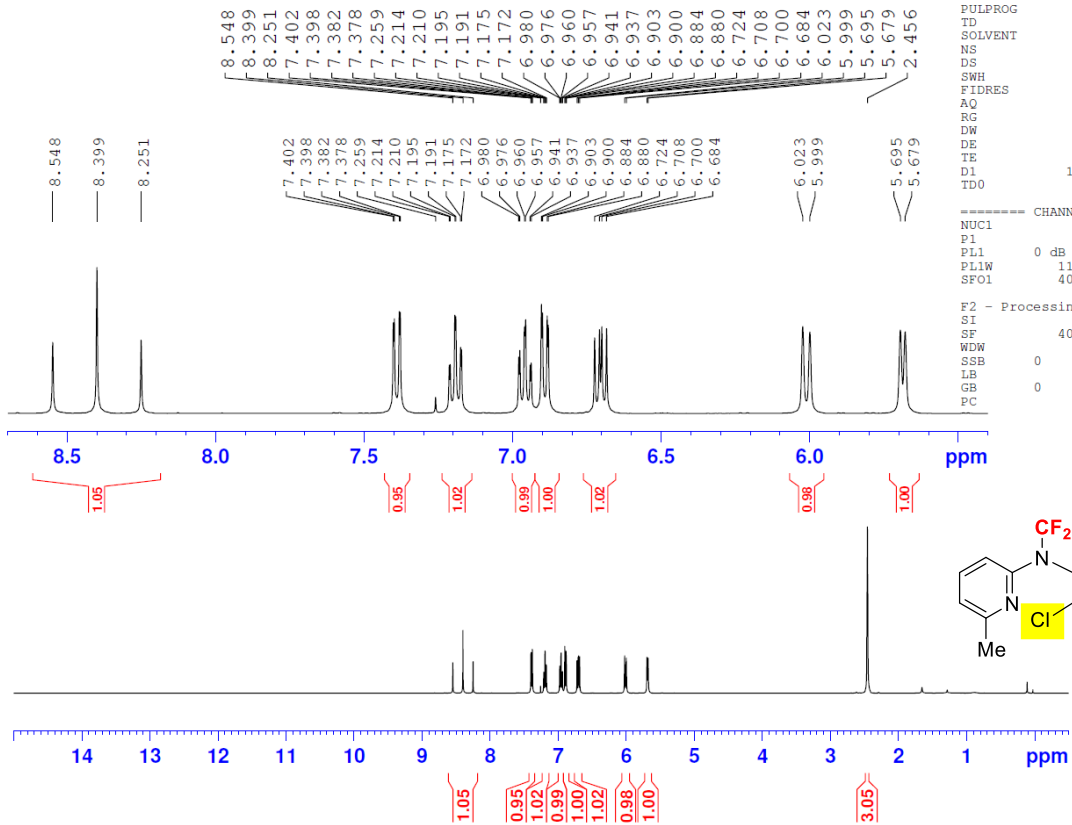

F2 - Acquisition Parameters  
 INSTRUM spect  
 PROBHD 5 mm PABBO BB-  
 PULPROG zg30  
 TD 16384  
 SOLVENT CDCl3  
 NS 16  
 DS 2  
 SWH 8012.820 Hz  
 FIDRES 0.489064 Hz  
 AQ 1.0223616 sec  
 RG 45.2  
 DW 62.400 usec  
 DE 6.50 usec  
 TE 299.2 K  
 D1 1.00000000 sec  
 TDO 1

----- CHANNEL f1 -----  
 NUC1 1H  
 P1 14.70 usec  
 PL1 0 dB  
 PL1W 11.88122272 W  
 SFO1 400.1336012 MHz

F2 - Processing parameters  
 SI 32768  
 SF 400.1300094 MHz  
 WDW EM  
 SSB 0  
 LB 0.30 Hz  
 GB 0  
 PC 1.00

N-(2-Chlorophenyl)-N-(difluoromethyl)-6-methylpyridin-2-amine 13C

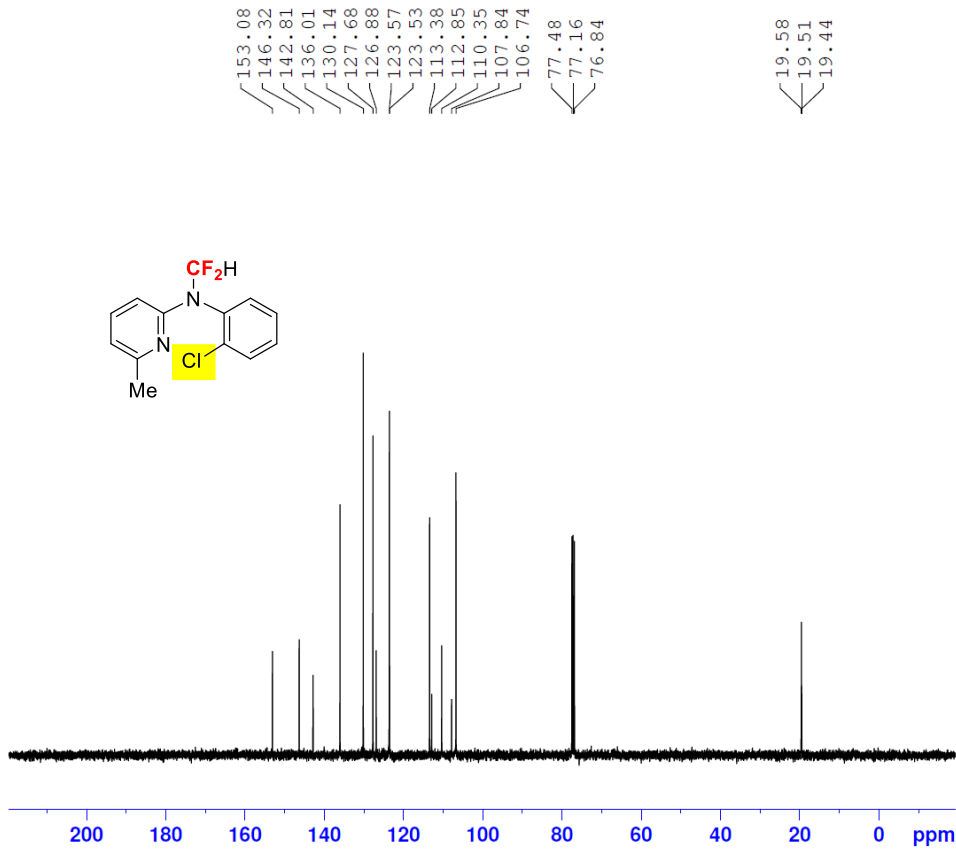

F2 - Acquisition Parameters  
INSTRUM spect  
PROBHD 5 mm PABBO BB-  
PULPROG zgpg30  
TD 65536  
SOLVENT CDCl3  
NS 49  
DS 2  
SWH 24038.461 Hz  
FIDRES 0.366798 Hz  
AQ 1.3631488 sec  
RG 228  
DW 20.800 usec  
DE 6.50 usec  
TE 299.5 K  
D1 2.0000000 sec  
D11 0.0300000 sec  
TD0 1

----- CHANNEL f1 -----  
NUC1 13C  
P1 9.50 usec  
PL1 -2.00 dB  
PL1W 58.52175522 W  
SFO1 100.6228298 MHz  
----- CHANNEL f2 -----  
CPDPRG[2] waltz16  
NUC2 1H  
PCPD2 80.00 usec  
PL2 0 dB  
PL12 15.00 dB  
PL13 15.00 dB  
PL2W 11.88122272 W  
PL12W 0.37571725 W  
PL13W 0.37571725 W  
SFO2 400.1316005 MHz

F2 - Processing parameters  
SI 32768  
SF 100.6127598 MHz  
WDW EM  
SSB 0  
LB 1.00 Hz  
GB 0  
PC 1.40

N-(2-Chlorophenyl)-N-(difluoromethyl)-6-methylpyridin-2-amine 19F

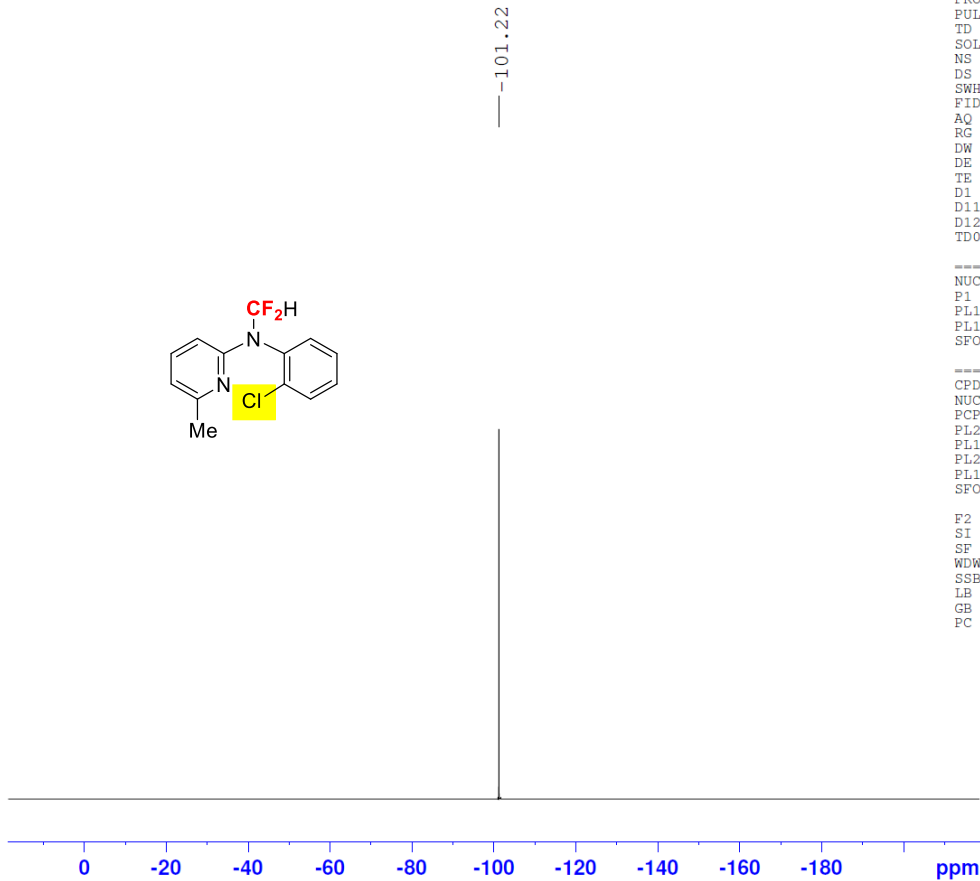

F2 - Acquisition Parameters  
INSTRUM spect  
PROBHD 5 mm PABBO BB-  
PULPROG zgfhigqn  
TD 131072  
SOLVENT CDCl3  
NS 16  
DS 4  
SWH 89285.711 Hz  
FIDRES 0.681196 Hz  
AQ 0.7340032 sec  
RG 645  
DW 5.600 usec  
DE 6.50 usec  
TE 299.5 K  
D1 1.0000000 sec  
D11 0.0300000 sec  
D12 0.0000200 sec  
TD0 1

----- CHANNEL f1 -----  
NUC1 19F  
P1 14.20 usec  
PL1 -3.00 dB  
PL1W 18.69428444 W  
SFO1 376.4607164 MHz  
----- CHANNEL f2 -----  
CPDPRG[2] waltz16  
NUC2 1H  
PCPD2 80.00 usec  
PL2 0 dB  
PL12 15.00 dB  
PL2W 11.88122272 W  
PL12W 0.37571725 W  
SFO2 400.1316005 MHz

F2 - Processing parameters  
SI 65536  
SF 376.4983660 MHz  
WDW EM  
SSB 0  
LB 0.30 Hz  
GB 0  
PC 1.00

# N-(Difluoromethyl)-N-(2,6-dimethylphenyl)-6-methylpyridin-2-amine (product 2y)

N-(Difluoromethyl)-N-(2,6-dimethylphenyl)-6-methylpyridin-2-amine 1H

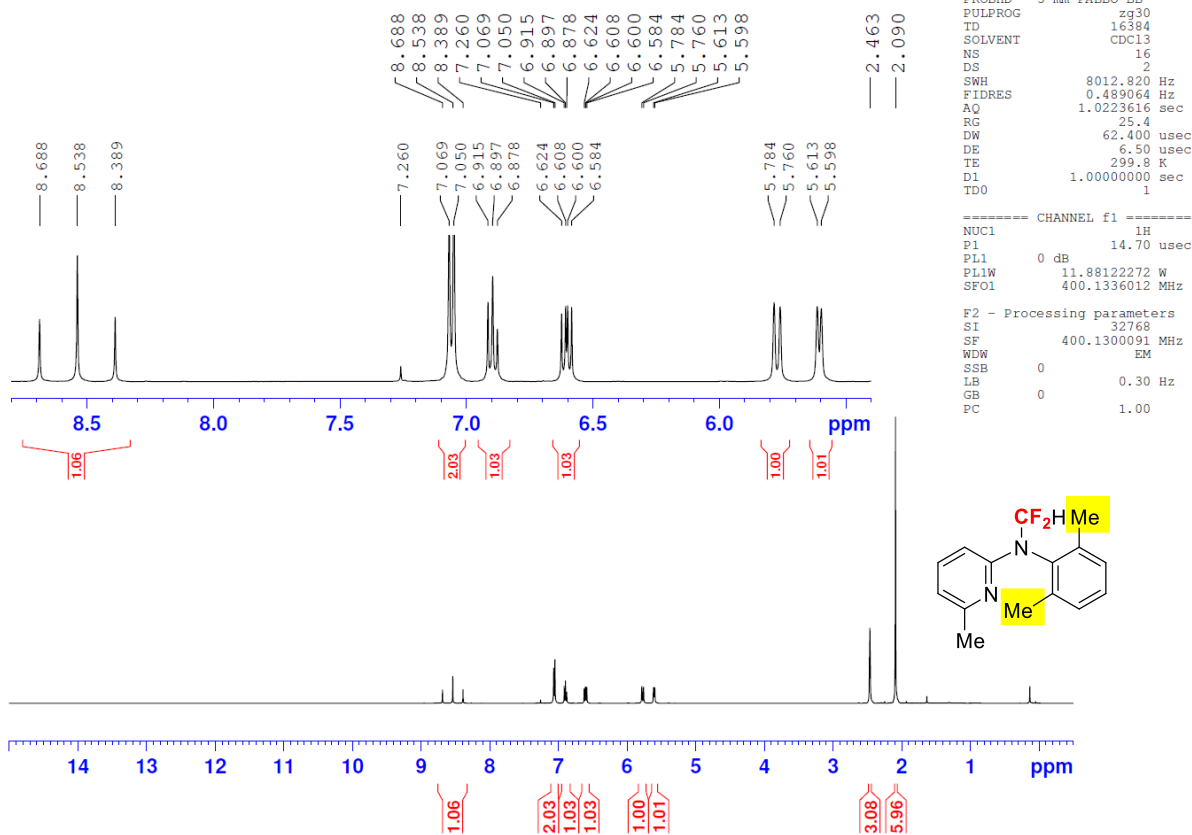

N-(Difluoromethyl)-N-(2,6-dimethylphenyl)-6-methylpyridin-2-amine 13C

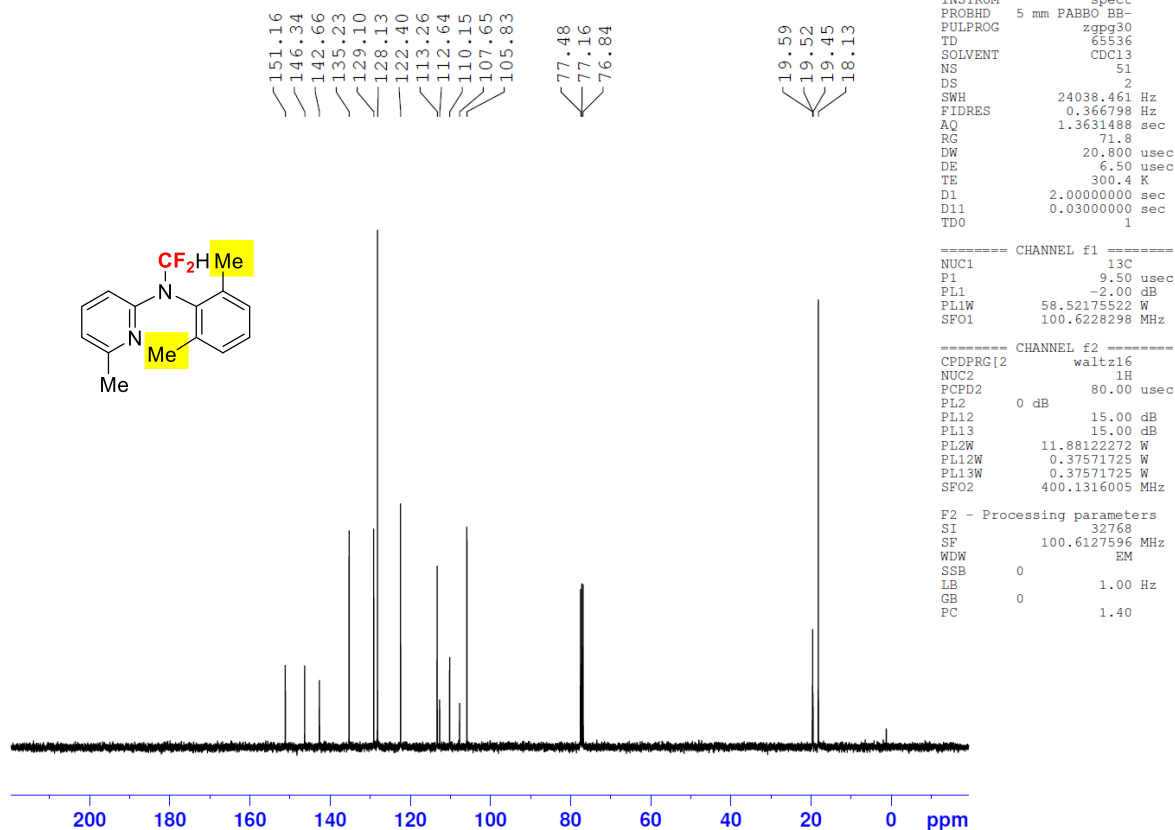



N- (Difluoromethyl)-N- (2,6-dimethylphenyl)-6-methylpyridin-2-amine 19F

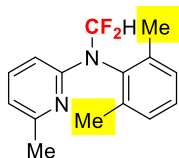

F2 - Acquisition Parameters  
 INSTRUM spect  
 PROBHD 5 mm PABBO BB-  
 PULPROG zgfhigqn  
 TD 131072  
 SOLVENT CDCl3  
 NS 16  
 DS 4  
 SWH 89285.711 Hz  
 FIDRES 0.681196 Hz  
 AQ 0.7340032 sec  
 RG 645  
 DW 5.600 usec  
 DE 6.50 usec  
 TE 300.1 K  
 D1 1.00000000 sec  
 D11 0.03000000 sec  
 D12 0.00002000 sec  
 TDO 1

===== CHANNEL f1 =====  
 NUC1 19F  
 P1 14.20 usec  
 PL1 -3.00 dB  
 PL1W 18.69428444 W  
 SFO1 376.4607164 MHz

===== CHANNEL f2 =====  
 CPDPRG[2] waltz16  
 NUC2 1H  
 PCPD2 80.00 usec  
 PL2 0 dB  
 PL12 15.00 dB  
 PL2W 11.88122272 W  
 PL12W 0.37571725 W  
 SFO2 400.1316005 MHz

F2 - Processing parameters  
 SI 65536  
 SF 376.4983660 MHz  
 WDW EM  
 SSB 0  
 LB 0.30 Hz  
 GB 0  
 PC 1.00

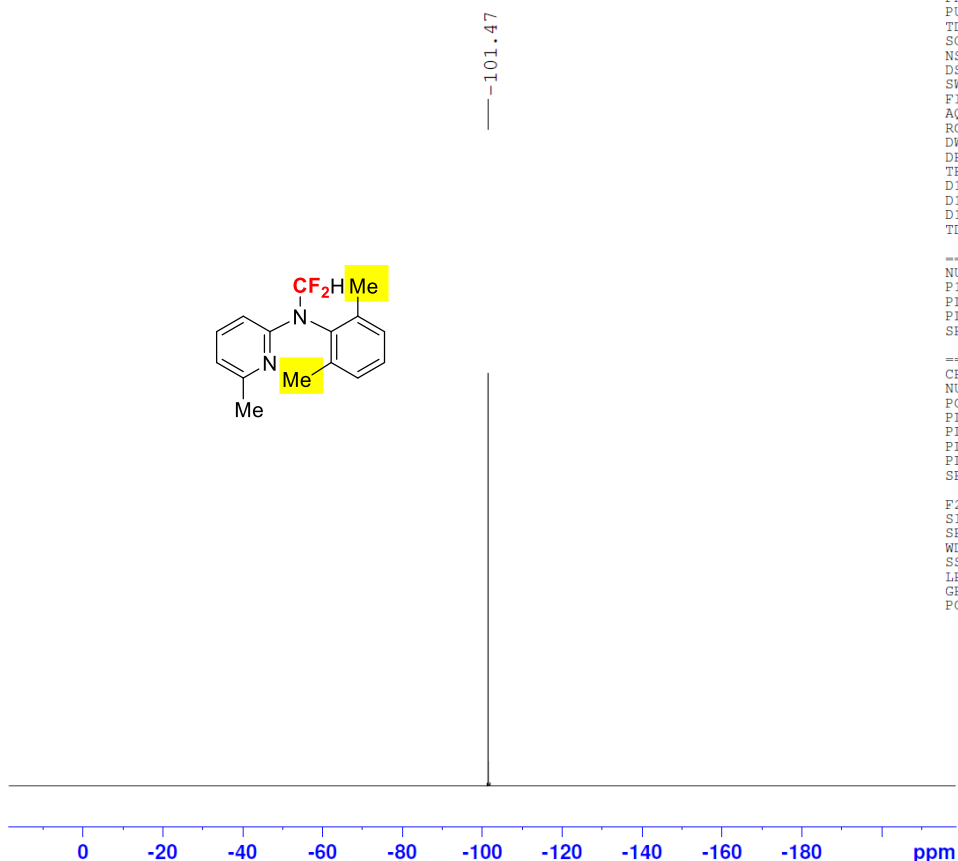

**N-(Difluoromethyl)-N-phenylquinolin-2-amine (product 2z)**

N- (Difluoromethyl)-N-phenylquinolin-2-amine 1H

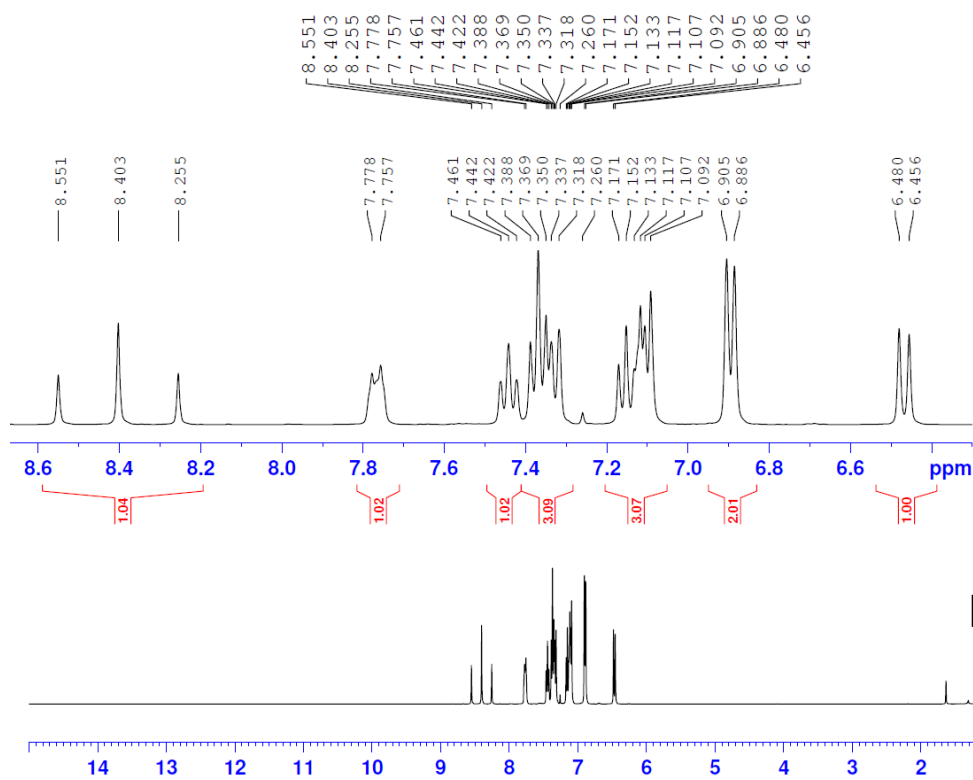

F2 - Acquisition Parameters  
 INSTRUM spect  
 PROBHD 5 mm PABBO BB-  
 PULPROG zg30  
 TD 32050  
 SOLVENT CDCl3  
 NS 16  
 DS 2  
 SWH 8012.820 Hz  
 FIDRES 0.250010 Hz  
 AQ 1.9999200 sec  
 RG 36  
 DW 62.400 usec  
 DE 6.50 usec  
 TE 298.1 K  
 D1 1.00000000 sec  
 TDO 1

===== CHANNEL f1 =====  
 NUC1 1H  
 P1 14.70 usec  
 PL1 0 dB  
 PL1W 11.88122272 W  
 SFO1 400.1336012 MHz

F2 - Processing parameters  
 SI 32768  
 SF 400.1300091 MHz  
 WDW EM  
 SSB 0  
 LB 0.30 Hz  
 GB 0  
 PC 1.00

N- (Difluoromethyl)-N-phenylquinolin-2-amine 13C

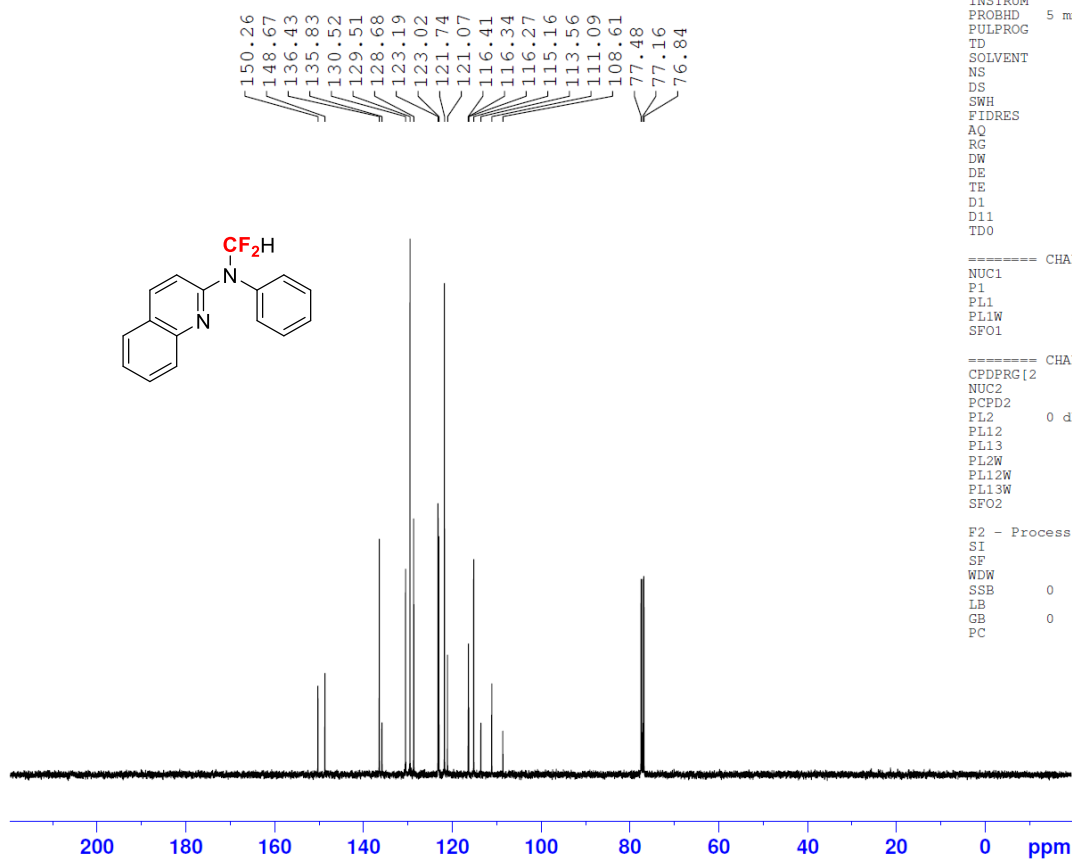

F2 - Acquisition Parameters  
 INSTRUM spect  
 PROBHD 5 mm PABBO BB-  
 PULPROG zgpg30  
 TD 6536  
 SOLVENT CDC13  
 NS 60  
 DS 2  
 SWH 24038.461 Hz  
 FIDRES 0.366798 Hz  
 AQ 1.3631488 sec  
 RG 228  
 DW 20.800 usec  
 DE 6.50 usec  
 TE 298.4 K  
 D1 2.0000000 sec  
 D11 0.0300000 sec  
 TD0 1

===== CHANNEL f1 =====  
 NUC1 13C  
 P1 9.50 usec  
 PL1 -2.00 dB  
 PL1W 58.52175522 W  
 SFO1 100.6228298 MHz  
 ===== CHANNEL f2 =====  
 CPDPRG[2] waltz16  
 NUC2 1H  
 PCPD2 80.00 usec  
 PL2 0 dB  
 PL12 15.00 dB  
 PL13 15.00 dB  
 PL2W 11.88122272 W  
 PL12W 0.37571725 W  
 PL13W 0.37571725 W  
 SFO2 400.1316005 MHz

F2 - Processing parameters  
 SI 32768  
 SF 100.6127624 MHz  
 WDW EM  
 SSB 0  
 LB 1.00 Hz  
 GB 0  
 PC 1.40

N- (Difluoromethyl)-N-phenylquinolin-2-amine 19F

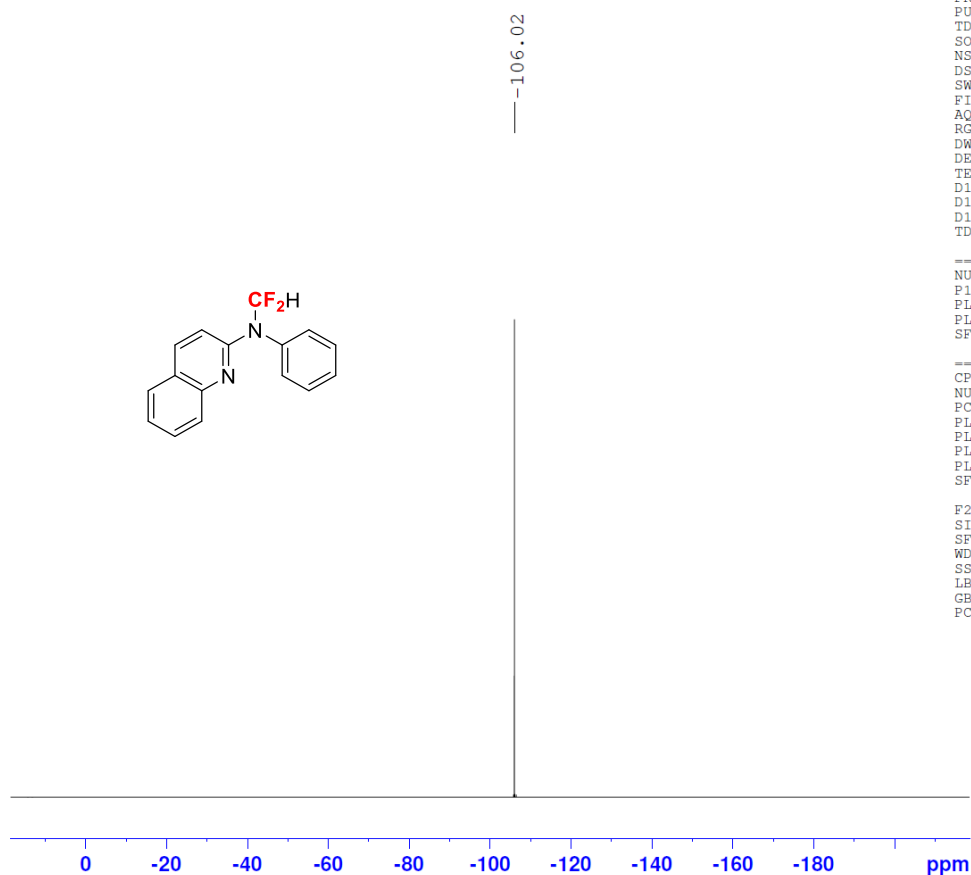

F2 - Acquisition Parameters  
 INSTRUM spect  
 PROBHD 5 mm PABBO BB-  
 PULPROG zgfhigqn  
 TD 131072  
 SOLVENT CDC13  
 NS 16  
 DS 4  
 SWH 89285.711 Hz  
 FIDRES 0.681196 Hz  
 AQ 0.7340032 sec  
 RG 645  
 DW 5.600 usec  
 DE 6.50 usec  
 TE 298.2 K  
 D1 1.0000000 sec  
 D11 0.0300000 sec  
 D12 0.0000200 sec  
 TD0 1

===== CHANNEL f1 =====  
 NUC1 19F  
 P1 14.20 usec  
 PL1 -3.00 dB  
 PL1W 18.69428444 W  
 SFO1 376.4607164 MHz  
 ===== CHANNEL f2 =====  
 CPDPRG[2] waltz16  
 NUC2 1H  
 PCPD2 80.00 usec  
 PL2 0 dB  
 PL12 15.00 dB  
 PL13 15.00 dB  
 PL2W 11.88122272 W  
 PL12W 0.37571725 W  
 SFO2 400.1316005 MHz

F2 - Processing parameters  
 SI 65536  
 SF 376.4983660 MHz  
 WDW EM  
 SSB 0  
 LB 0.30 Hz  
 GB 0  
 PC 1.00

# N-(Difluoromethyl)-N-phenylpyrimidin-2-amine (product 4a)

N-(Difluoromethyl)-N-phenylpyrimidin-2-amine 1H

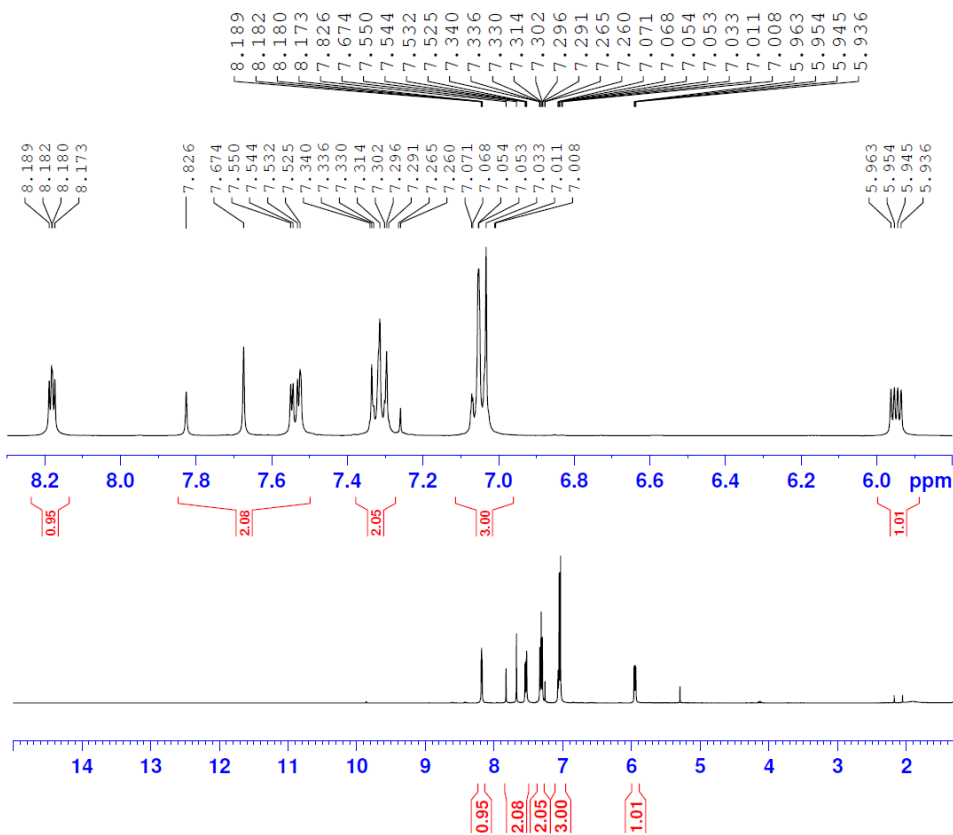

```

F2 - Acquisition Parameters
INSTRUM spect
PROBHD 5 mm PABBO BB-
PULPROG zg30
TD 16384
SOLVENT CDCl3
NS 16
DS 2
SWH 8012.820 Hz
FIDRES 0.489064 Hz
AQ 1.0223616 sec
RG 101
DW 62.400 usec
DE 6.50 usec
TE 299.0 K
D1 1.0000000 sec
TDO 1

===== CHANNEL f1 =====
NUC1 1H
P1 14.70 usec
PL1 0 dB
PL1W 11.88122272 W
SFO1 400.1336012 MHz

F2 - Processing parameters
SI 32768
SF 400.1300097 MHz
WDW EM
SSB 0
LB 0.30 Hz
GB 0
PC 1.00
    
```

N-(Difluoromethyl)-N-phenylpyrimidin-2-amine 13C

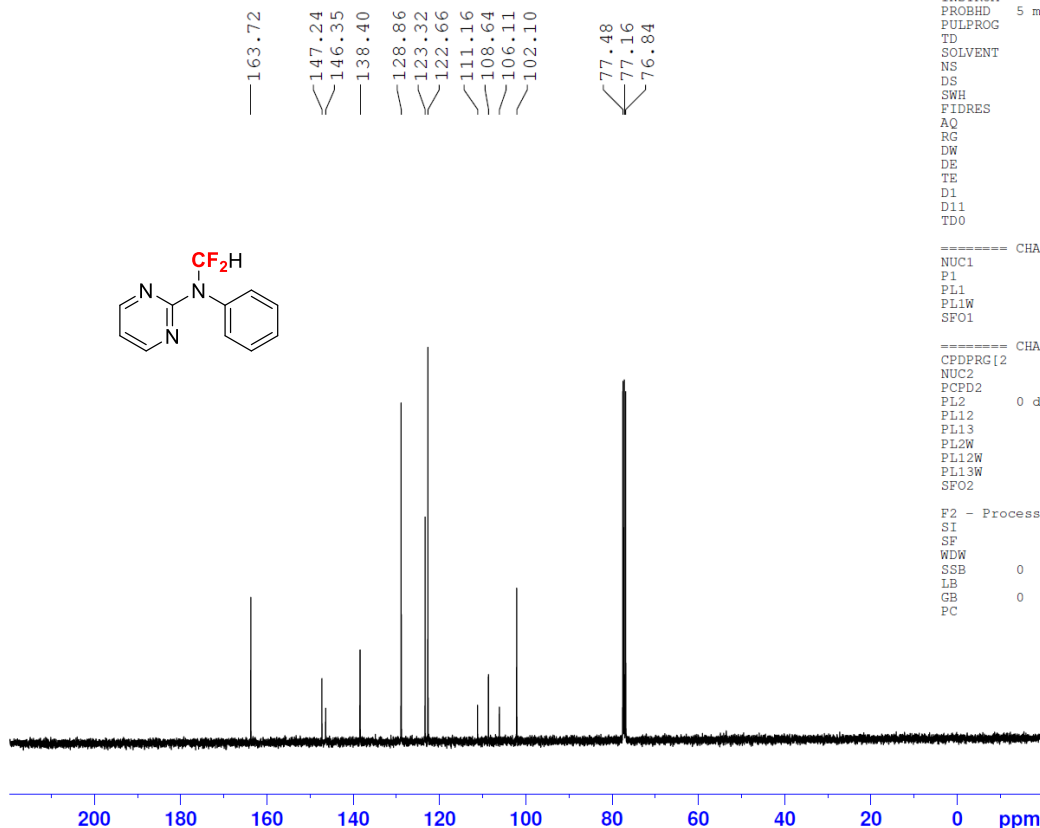

```

F2 - Acquisition Parameters
INSTRUM spect
PROBHD 5 mm PABBO BB-
PULPROG zgpg30
TD 65536
SOLVENT CDCl3
NS 142
DS 2
SWH 24038.461 Hz
FIDRES 0.366798 Hz
AQ 1.3631488 sec
RG 228
DW 20.800 usec
DE 6.50 usec
TE 299.9 K
D1 2.0000000 sec
D11 0.03000000 sec
TDO 1

===== CHANNEL f1 =====
NUC1 13C
P1 9.50 usec
PL1 -2.00 dB
PL1W 58.52175522 W
SFO1 100.6228298 MHz

===== CHANNEL f2 =====
CPDPRG[2] waltz16
NUC2 1H
PCPD2 80.00 usec
PL2 0 dB
PL2 15.00 dB
PL13 15.00 dB
PL2W 11.88122272 W
PL12W 0.37571725 W
PL13W 0.37571725 W
SFO2 400.1316005 MHz

F2 - Processing parameters
SI 32768
SF 100.6127584 MHz
WDW EM
SSB 0
LB 1.00 Hz
GB 0
PC 1.40
    
```

N-(Difluoromethyl)-N-phenylpyrimidin-2-amine 19F

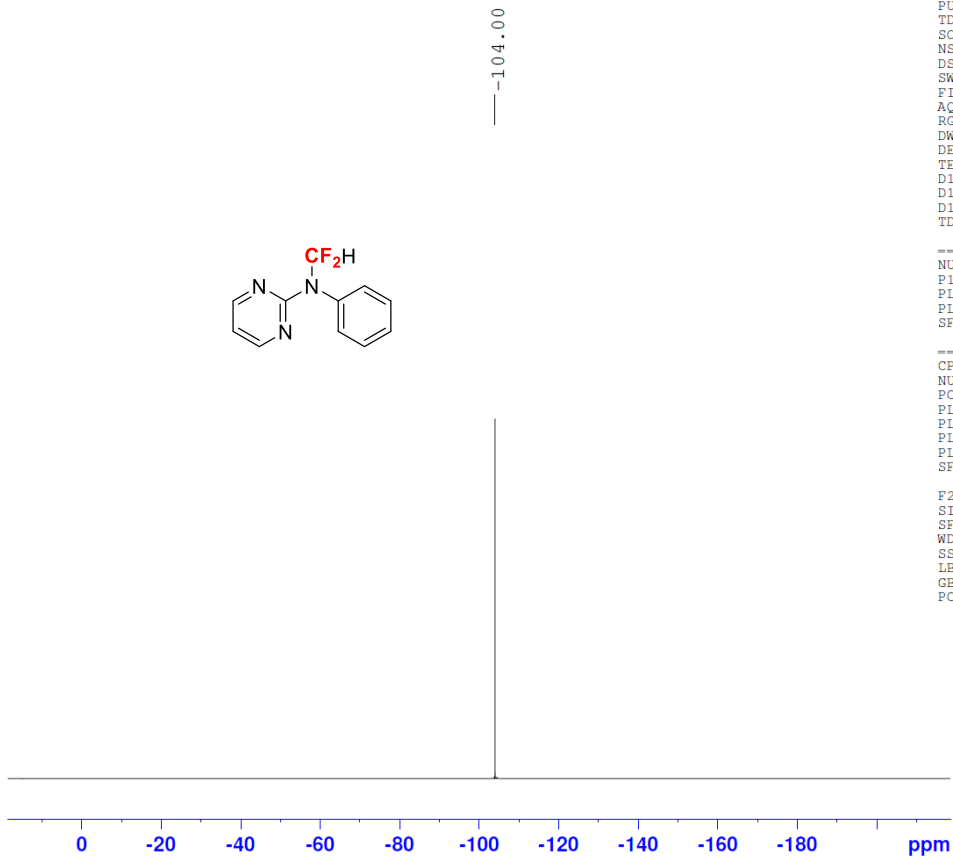

F2 - Acquisition Parameters  
 INSTRUM spect  
 PROBHD 5 mm PABBO BB-  
 PULPROG zgfhiggn  
 TD 131072  
 SOLVENT CDCl3  
 NS 16  
 DS 4  
 SWH 89285.711 Hz  
 FIDRES 0.681196 Hz  
 AQ 0.7340032 sec  
 RG 1030  
 DW 5.600 usec  
 DE 6.50 usec  
 TE 299.2 K  
 D1 1.00000000 sec  
 D11 0.03000000 sec  
 D12 0.00002000 sec  
 TDO 1

----- CHANNEL f1 -----  
 NUC1 19F  
 P1 14.20 usec  
 PL1 -3.00 dB  
 PL1W 18.69428444 W  
 SFO1 376.4607164 MHz

----- CHANNEL f2 -----  
 CPDPRG[2] waltz16  
 NUC2 1H  
 PCPD2 80.00 usec  
 PL2 0 dB  
 PL12 15.00 dB  
 PL2W 11.88122272 W  
 PL12W 0.37571725 W  
 SFO2 400.1316005 MHz

F2 - Processing parameters  
 SI 65336  
 SF 376.4983660 MHz  
 WDW EM  
 SSB 0  
 LB 0.30 Hz  
 GB 0  
 PC 1.00

N-(4-Chlorophenyl)-N-(difluoromethyl)pyrimidin-2-amine (product 4b)

N-(4-Chlorophenyl)-N-(difluoromethyl)pyrimidin-2-amine 1H

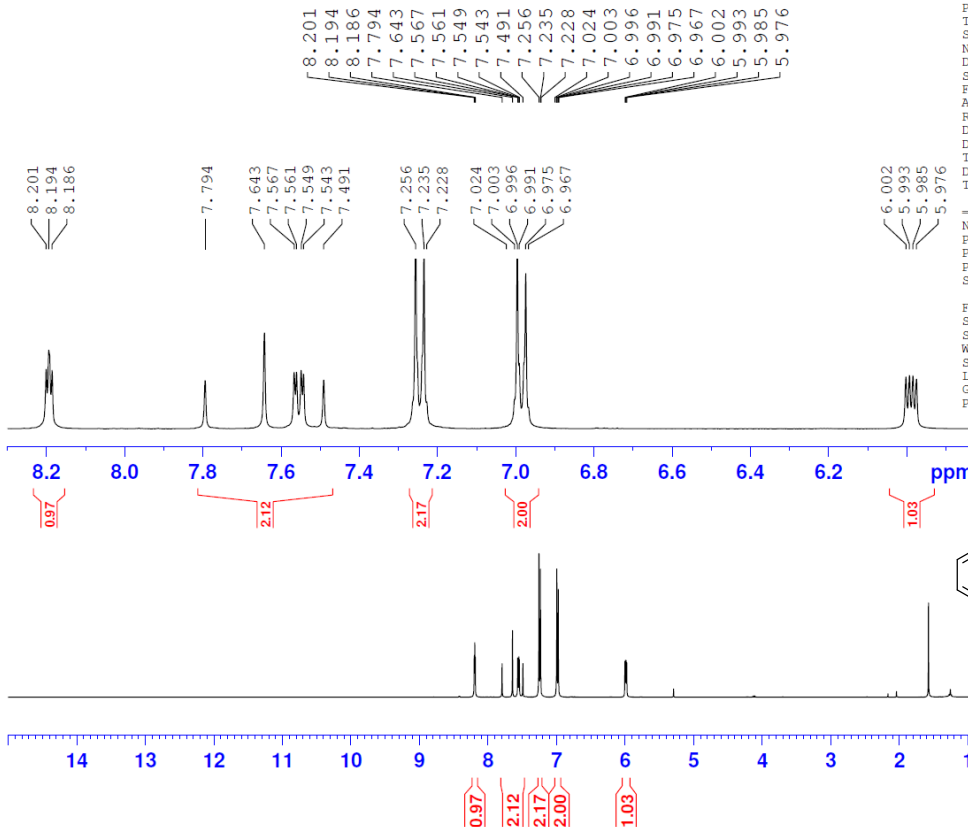

F2 - Acquisition Parameters  
 INSTRUM spect  
 PROBHD 5 mm PABBO BB-  
 PULPROG zg30  
 TD 16384  
 SOLVENT CDCl3  
 NS 16  
 DS 2  
 SWH 8012.820 Hz  
 FIDRES 0.489064 Hz  
 AQ 1.0223616 sec  
 RG 181  
 DW 62.400 usec  
 DE 6.50 usec  
 TE 299.2 K  
 D1 1.00000000 sec  
 TDO 1

----- CHANNEL f1 -----  
 NUC1 1H  
 P1 14.70 usec  
 PL1 0 dB  
 PL1W 11.88122272 W  
 SFO1 400.1336012 MHz

F2 - Processing parameters  
 SI 32768  
 SF 400.1300115 MHz  
 WDW EM  
 SSB 0  
 LB 0.30 Hz  
 GB 0  
 PC 1.00

N-(4-Chlorophenyl)-N-(difluoromethyl)pyrimidin-2-amine 13C

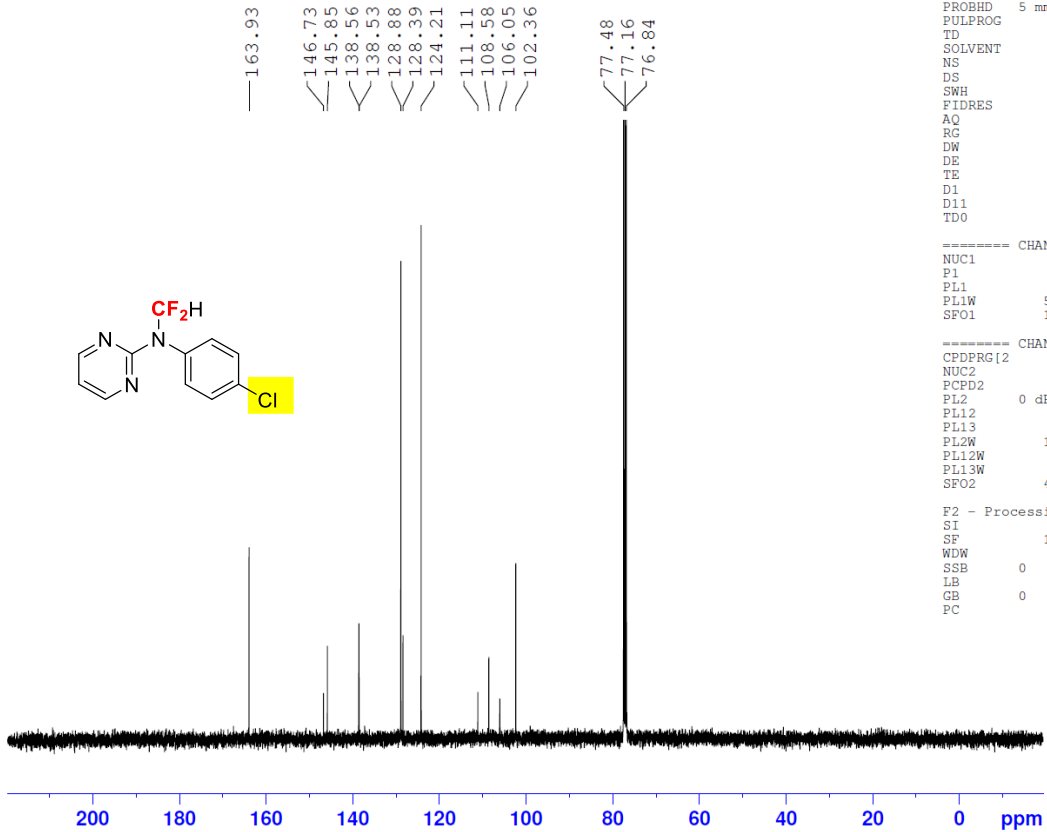

```

F2 - Acquisition Parameters
INSTRUM spect
PROBHD 5 mm PABBO BB-
PULPROG zgpg30
TD 65536
SOLVENT CDCl3
NS 275
DS 2
SWH 24038.461 Hz
FIDRES 0.366798 Hz
AQ 1.3631488 sec
RG 228
DW 20.800 usec
DE 6.50 usec
TE 299.2 K
D1 2.00000000 sec
D11 0.03000000 sec
TD0 1

===== CHANNEL f1 =====
NUC1 13C
P1 9.50 usec
PL1 -2.00 dB
PL1W 58.52175522 W
SFO1 100.6228298 MHz

===== CHANNEL f2 =====
CPDPRG[2] waltz16
NUC2 1H
PCPD2 80.00 usec
PL2 0 dB
PL12 15.00 dB
PL13 15.00 dB
PL2W 11.88122272 W
PL12W 0.37571725 W
PL13W 0.37571725 W
SFO2 400.1316005 MHz

F2 - Processing parameters
SI 32768
SF 100.6127545 MHz
WDW EM
SSB 0
LB 1.00 Hz
GB 0
PC 1.40
    
```

N-(4-Chlorophenyl)-N-(difluoromethyl)pyrimidin-2-amine 19F

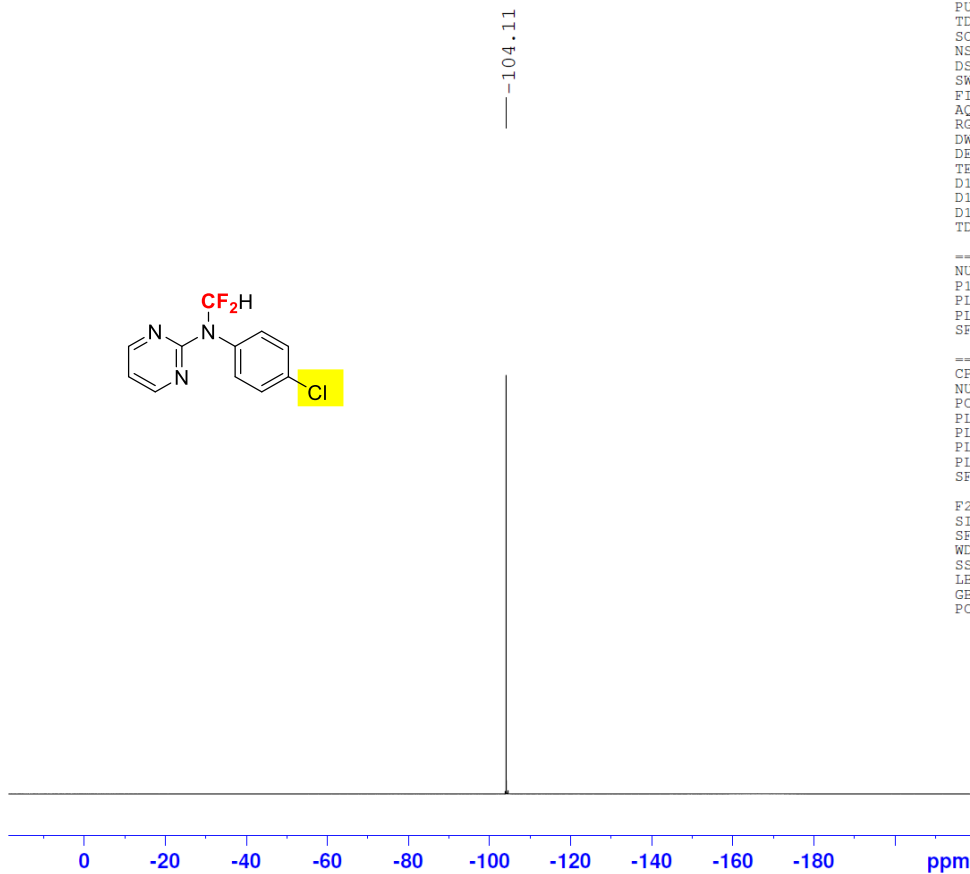

```

F2 - Acquisition Parameters
INSTRUM spect
PROBHD 5 mm PABBO BB-
PULPROG zgfhggn
TD 131072
SOLVENT CDCl3
NS 16
DS 4
SWH 89285.711 Hz
FIDRES 0.681196 Hz
AQ 0.7340032 sec
RG 1290
DW 5.600 usec
DE 6.50 usec
TE 299.2 K
D1 1.00000000 sec
D11 0.03000000 sec
D12 0.00002000 sec
TD0 1

===== CHANNEL f1 =====
NUC1 19F
P1 14.20 usec
PL1 -3.00 dB
PL1W 18.69428444 W
SFO1 376.4607164 MHz

===== CHANNEL f2 =====
CPDPRG[2] waltz16
NUC2 1H
PCPD2 80.00 usec
PL2 0 dB
PL12 15.00 dB
PL2W 11.88122272 W
PL12W 0.37571725 W
SFO2 400.1316005 MHz

F2 - Processing parameters
SI 65536
SF 376.4983660 MHz
WDW EM
SSB 0
LB 0.30 Hz
GB 0
PC 1.00
    
```

# N-(3-Bromophenyl)-N-(difluoromethyl)pyrimidin-2-amine (product 4c)

N-(3-Bromophenyl)-N-(difluoromethyl)pyrimidin-2-amine 1H

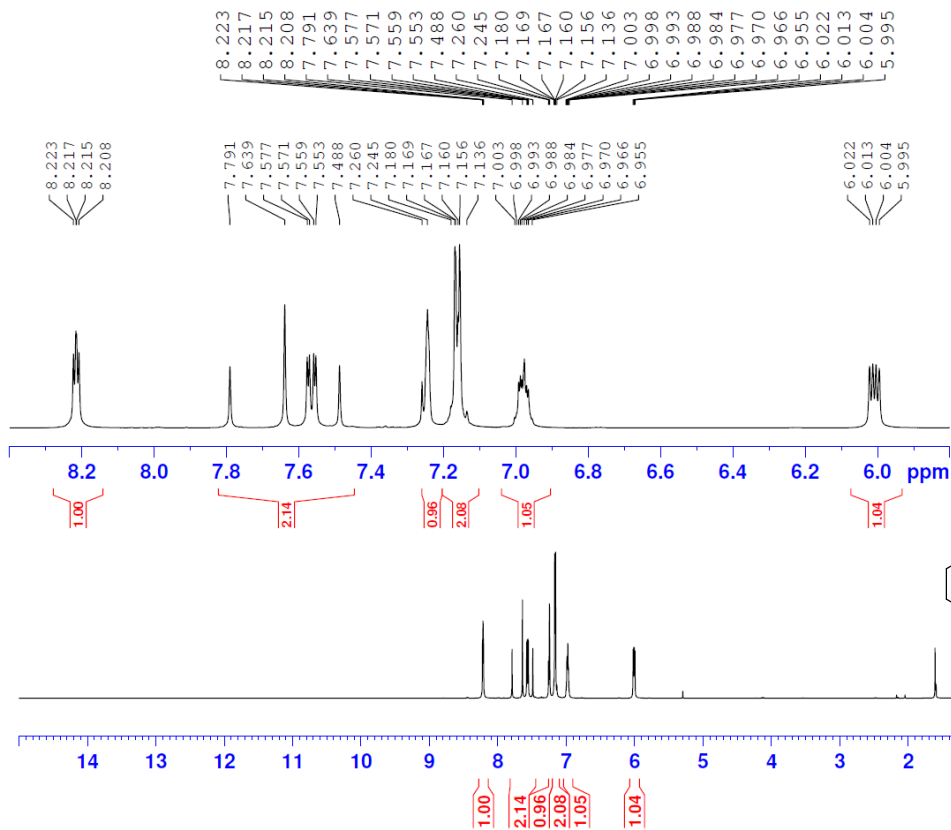

```
F2 - Acquisition Parameters
INSTRUM spect
PROBHD 5 mm PABBO BB-
PULPROG zg30
TD 16384
SOLVENT CDCl3
NS 16
DS 2
SWH 8012.820 Hz
FIDRES 0.489064 Hz
AQ 1.0223616 sec
RG 114
DW 62.400 usec
DE 6.50 usec
TE 299.0 K
D1 1.00000000 sec
TD0 1
```

```
===== CHANNEL f1 =====
NUC1 1H
P1 14.70 usec
PL1 0 dB
PL1W 11.88122272 W
SFO1 400.1336012 MHz
```

```
F2 - Processing parameters
SI 32768
SF 400.1300098 MHz
WDW EM
SSB 0
LB 0.30 Hz
GB 0
PC 1.00
```

N-(3-Bromophenyl)-N-(difluoromethyl)pyrimidin-2-amine 13C

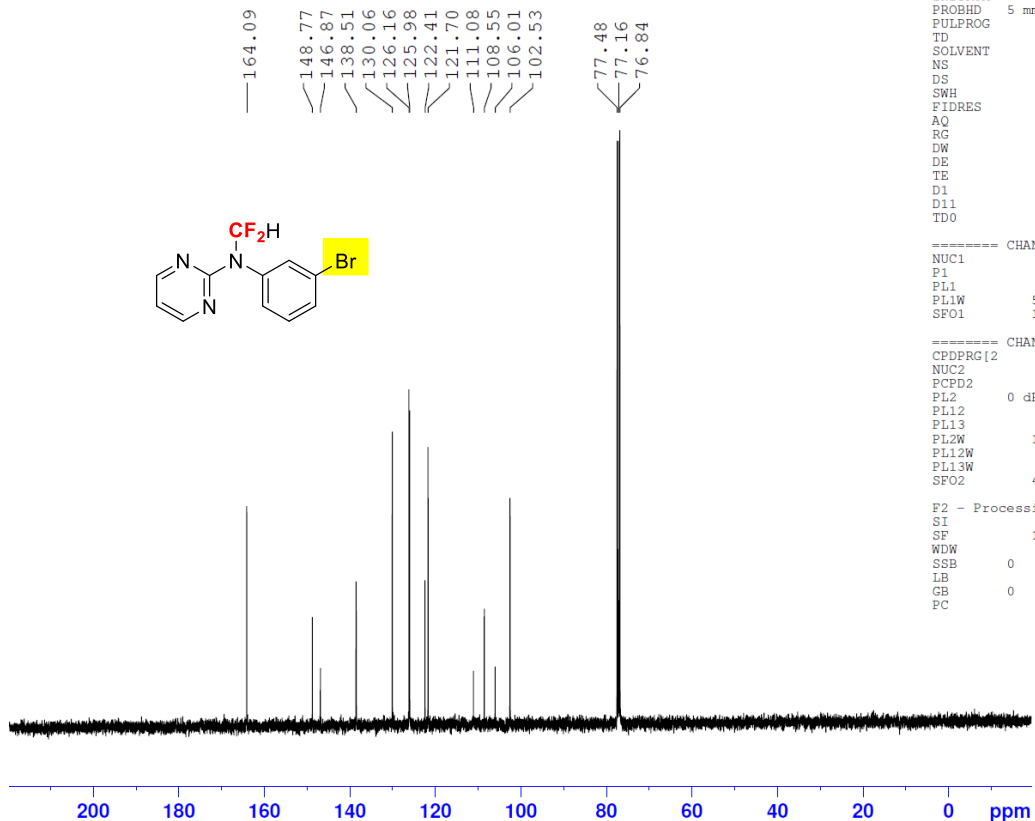

```
F2 - Acquisition Parameters
INSTRUM spect
PROBHD 5 mm PABBO BB-
PULPROG zgpg30
TD 65536
SOLVENT CDCl3
NS 179
DS 2
SWH 24038.461 Hz
FIDRES 0.366798 Hz
AQ 1.3631488 sec
RG 228
DW 20.800 usec
DE 6.50 usec
TE 299.2 K
D1 2.00000000 sec
D11 0.03000000 sec
TD0 1
```

```
===== CHANNEL f1 =====
NUC1 13C
P1 9.50 usec
PL1 -2.00 dB
PL1W 58.5217522 W
SFO1 100.6228298 MHz
```

```
===== CHANNEL f2 =====
CPDPRG[2] waltz16
NUC2 1H
PCPD2 80.00 usec
PL2 0 dB
PL12 15.00 dB
PL13 15.00 dB
PL2W 11.88122272 W
PL12W 0.37571725 W
PL13W 0.37571725 W
SFO2 400.1316005 MHz
```

```
F2 - Processing parameters
SI 32768
SF 100.6127572 MHz
WDW EM
SSB 0
LB 1.00 Hz
GB 0
PC 1.40
```

N-(3-Bromophenyl)-N-(difluoromethyl)pyrimidin-2-amine 19F

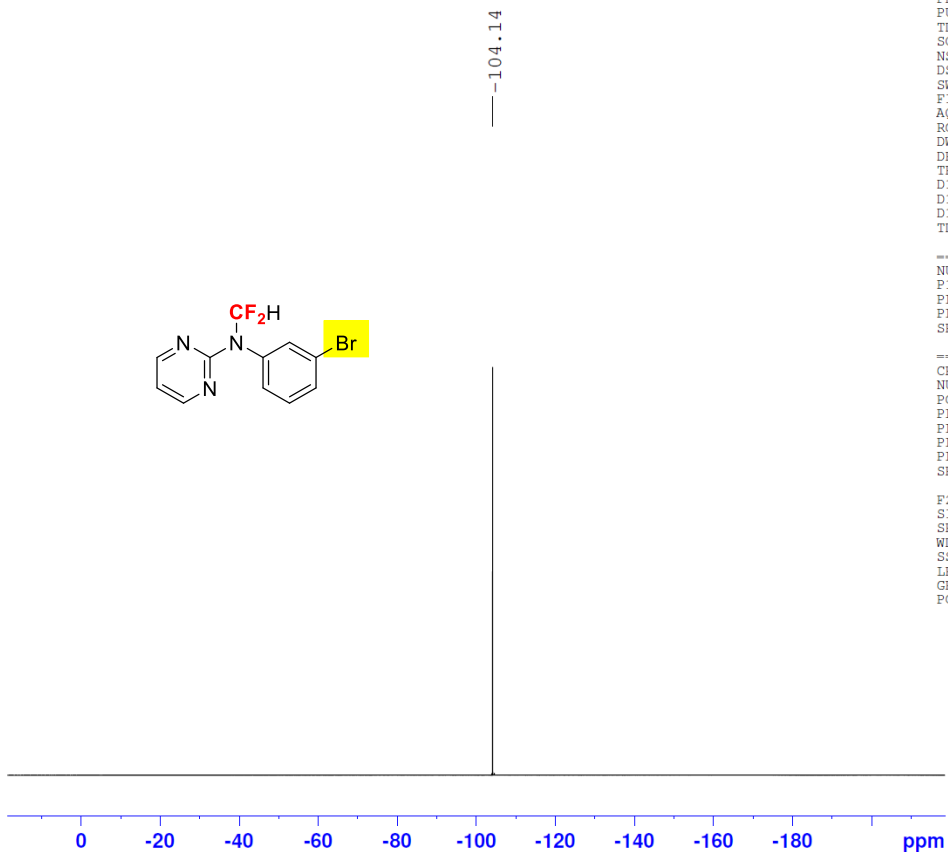

F2 - Acquisition Parameters  
 INSTRUM spect  
 PROBHD 5 mm PABBO BB-  
 PULPROG zgfgiagn  
 TD 131072  
 SOLVENT CDCl3  
 NS 16  
 DS 4  
 SWH 89285.711 Hz  
 FIDRES 0.681196 Hz  
 AQ 0.7340032 sec  
 RG 1030  
 DW 5.600 usec  
 DE 6.50 usec  
 TE 299.0 K  
 D1 1.00000000 sec  
 D11 0.03000000 sec  
 D12 0.00002000 sec  
 TDO 1

===== CHANNEL f1 =====  
 NUC1 19F  
 P1 14.20 usec  
 PL1 -3.00 dB  
 PL1W 18.69428444 W  
 SFO1 376.4607164 MHz

===== CHANNEL f2 =====  
 CPDPRG2 waltz16  
 NUC2 1H  
 PCPD2 80.00 usec  
 PL2 0 dB  
 PL12 15.00 dB  
 PL2W 11.88122272 W  
 PL12W 0.37571725 W  
 SFO2 400.1316005 MHz

F2 - Processing parameters  
 SI 65536  
 SF 376.4983660 MHz  
 WDW EM  
 SSB 0  
 LB 0.30 Hz  
 GB 0  
 PC 1.00

N-(5-Bromo-2-methylphenyl)-N-(difluoromethyl)pyrimidin-2-amine (product 4d)

N-(5-Bromo-2-methylphenyl)-N-(difluoromethyl)pyrimidin-2-amine 1H

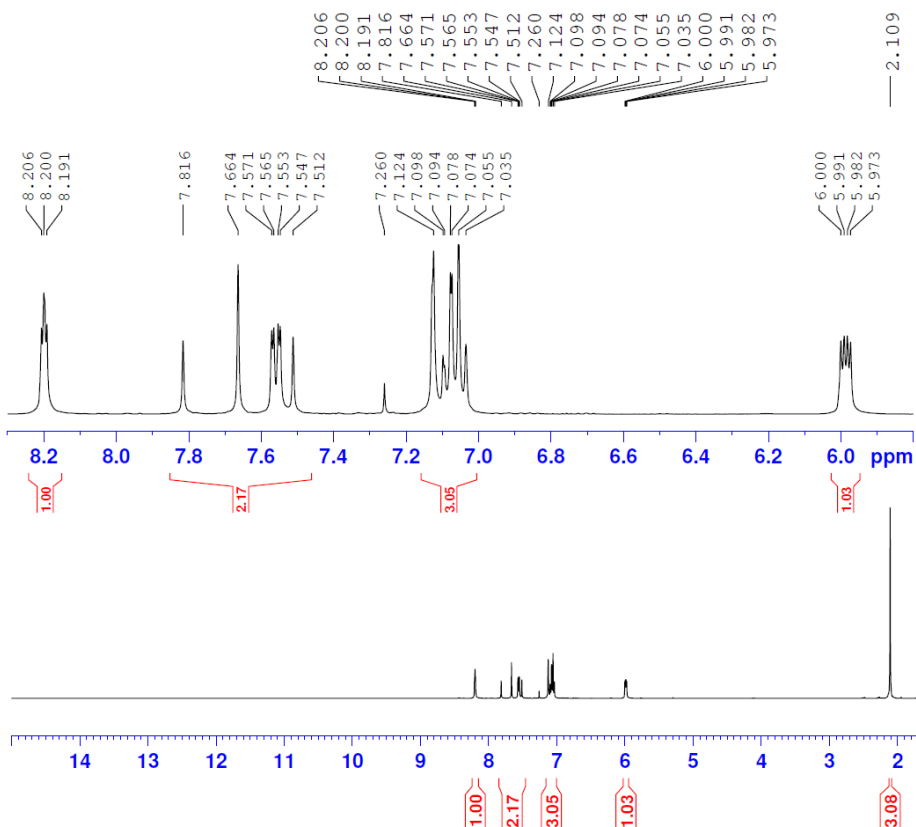

F2 - Acquisition Parameters  
 INSTRUM spect  
 PROBHD 5 mm PABBO BB-  
 PULPROG zg30  
 TD 16384  
 SOLVENT CDCl3  
 NS 16  
 DS 2  
 SWH 8012.820 Hz  
 FIDRES 0.489064 Hz  
 AQ 1.0223616 sec  
 RG 64  
 DW 62.400 usec  
 DE 6.50 usec  
 TE 299.5 K  
 D1 1.00000000 sec  
 TDO 1

===== CHANNEL f1 =====  
 NUC1 1H  
 P1 14.70 usec  
 PL1 0 dB  
 PL1W 11.88122272 W  
 SFO1 400.1336012 MHz

F2 - Processing parameters  
 SI 32768  
 SF 400.1300097 MHz  
 WDW EM  
 SSB 0  
 LB 0.30 Hz  
 GB 0  
 PC 1.00

N- (5-Bromo-2-methylphenyl)-N- (difluoromethyl)pyrimidin-2-amine 13C

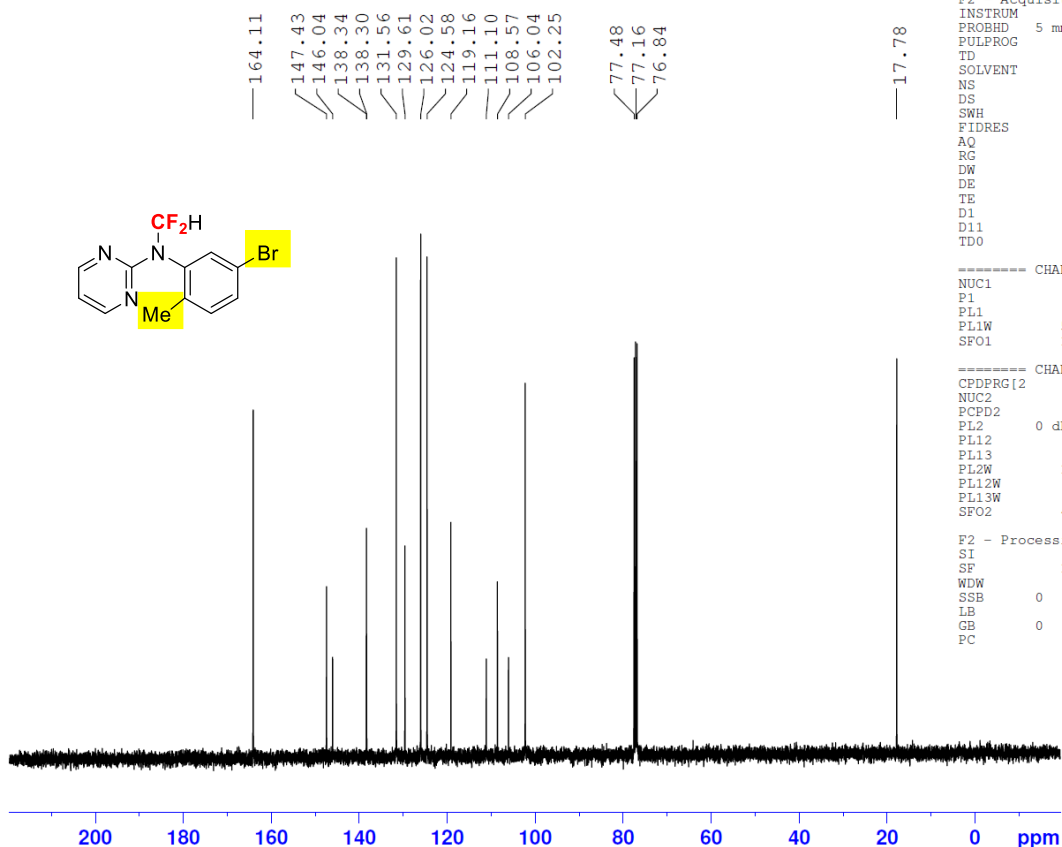

F2 - Acquisition Parameters  
 INSTRUM spect  
 PROBHD 5 mm PABBO BB-  
 PULPROG zgpg30  
 TD 65536  
 SOLVENT CDC13  
 NS 128  
 DS 2  
 SWH 24038.461 Hz  
 FIDRES 0.366798 Hz  
 AQ 1.3631488 sec  
 RG 228  
 DW 20.800 usec  
 DE 6.50 usec  
 TE 300.6 K  
 D1 2.0000000 sec  
 D11 0.0300000 sec  
 TD0 1

----- CHANNEL f1 -----  
 NUC1 13C  
 P1 9.50 usec  
 PL1 -2.00 dB  
 PL1W 58.5217522 W  
 SFO1 100.6228298 MHz

----- CHANNEL f2 -----  
 CPDPRG[2] waltz16  
 NUC2 1H  
 P1 80.00 usec  
 PL2 0 dB  
 PL12 15.00 dB  
 PL13 15.00 dB  
 PL2W 11.88122272 W  
 PL12W 0.37571725 W  
 PL13W 0.37571725 W  
 SFO2 400.1316005 MHz

F2 - Processing parameters  
 SI 32768  
 SF 100.6127610 MHz  
 WDW EM  
 SSB 0  
 LB 1.00 Hz  
 GB 0  
 PC 1.40

N- (5-Bromo-2-methylphenyl)-N- (difluoromethyl)pyrimidin-2-amine 19F

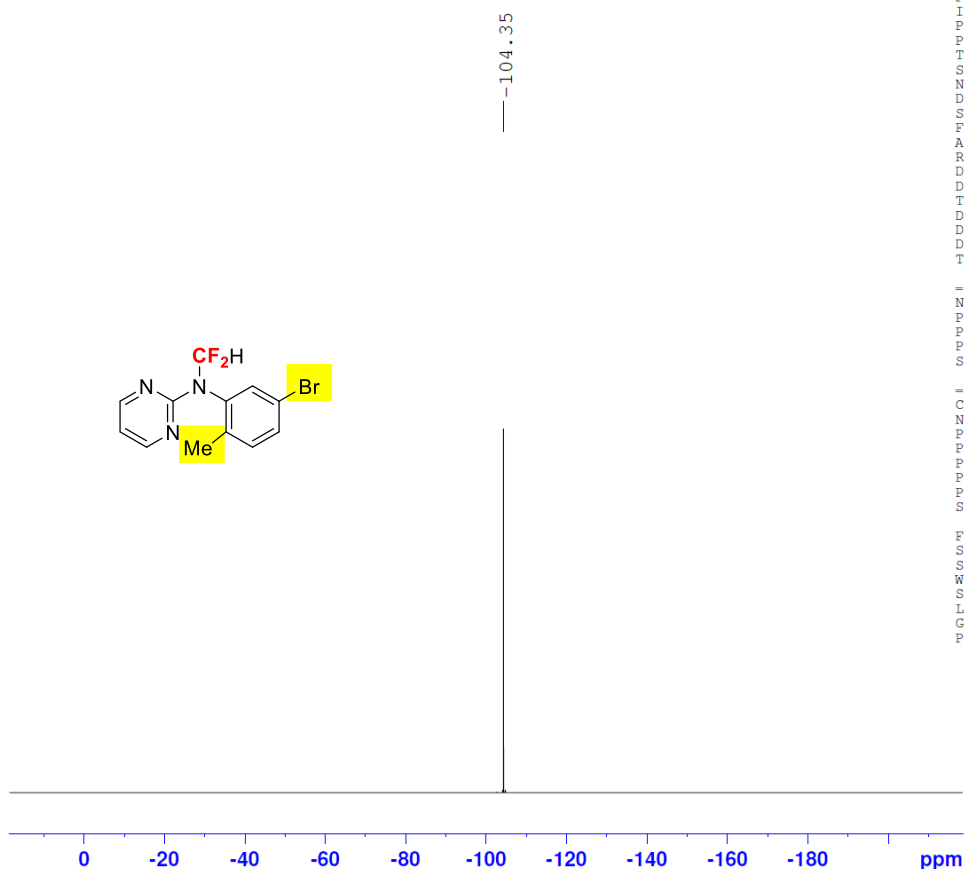

F2 - Acquisition Parameters  
 INSTRUM spect  
 PROBHD 5 mm PABBO BB-  
 PULPROG zgfhigqn  
 TD 131072  
 SOLVENT CDC13  
 NS 16  
 DS 4  
 SWH 89285.711 Hz  
 FIDRES 0.681196 Hz  
 AQ 0.7340032 sec  
 RG 912  
 DW 5.600 usec  
 DE 6.50 usec  
 TE 300.0 K  
 D1 1.0000000 sec  
 D11 0.0300000 sec  
 D12 0.0000200 sec  
 TD0 1

----- CHANNEL f1 -----  
 NUC1 19F  
 P1 14.20 usec  
 PL1 -3.00 dB  
 PL1W 18.69428444 W  
 SFO1 376.4607164 MHz

----- CHANNEL f2 -----  
 CPDPRG[2] waltz16  
 NUC2 1H  
 P1 80.00 usec  
 PL2 0 dB  
 PL12 15.00 dB  
 PL2W 11.88122272 W  
 PL12W 0.37571725 W  
 SFO2 400.1316005 MHz

F2 - Processing parameters  
 SI 65536  
 SF 376.4983660 MHz  
 WDW EM  
 SSB 0  
 LB 0.30 Hz  
 GB 0  
 PC 1.00



# N-(Difluoromethyl)-N-(naphthalen-1-yl)pyrimidin-2-amine (product 4e)

N-(Difluoromethyl)-N-(naphthalen-1-yl)pyrimidin-2-amine 1H

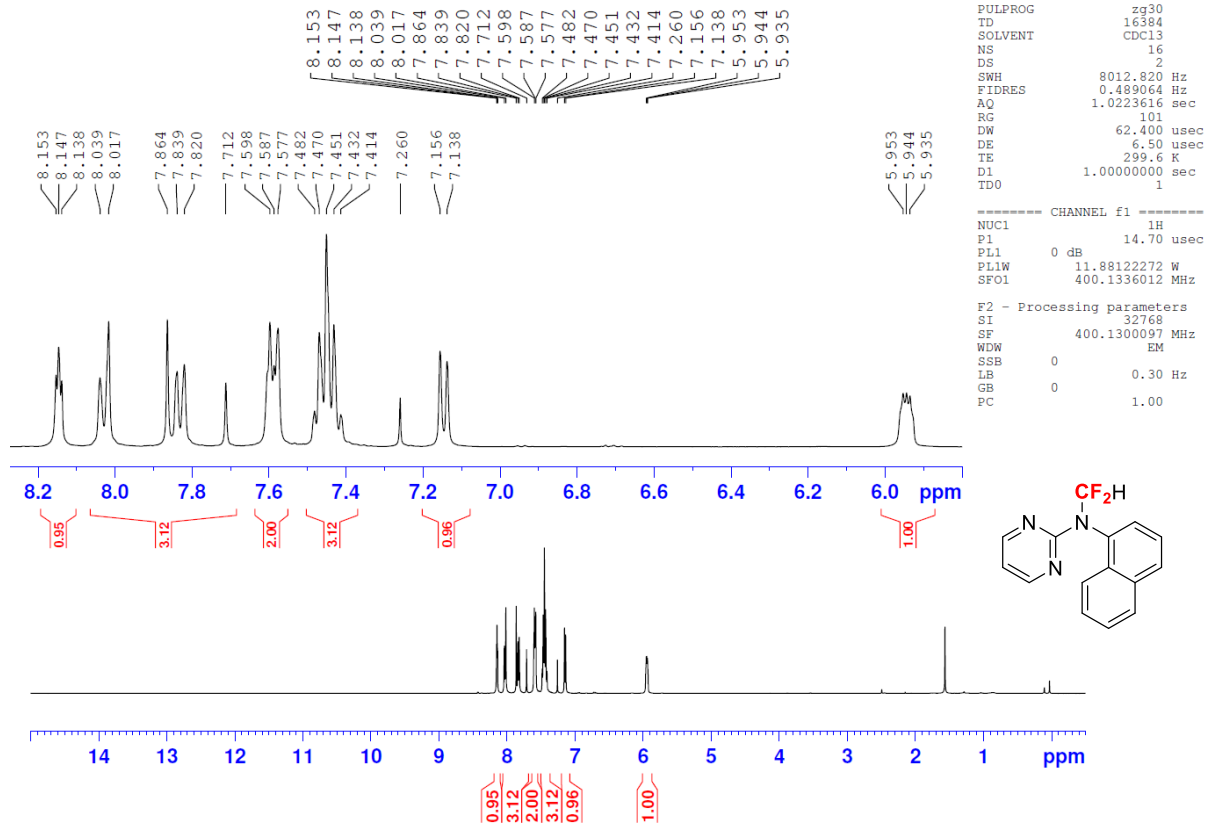

N-(Difluoromethyl)-N-(naphthalen-1-yl)pyrimidin-2-amine 13C

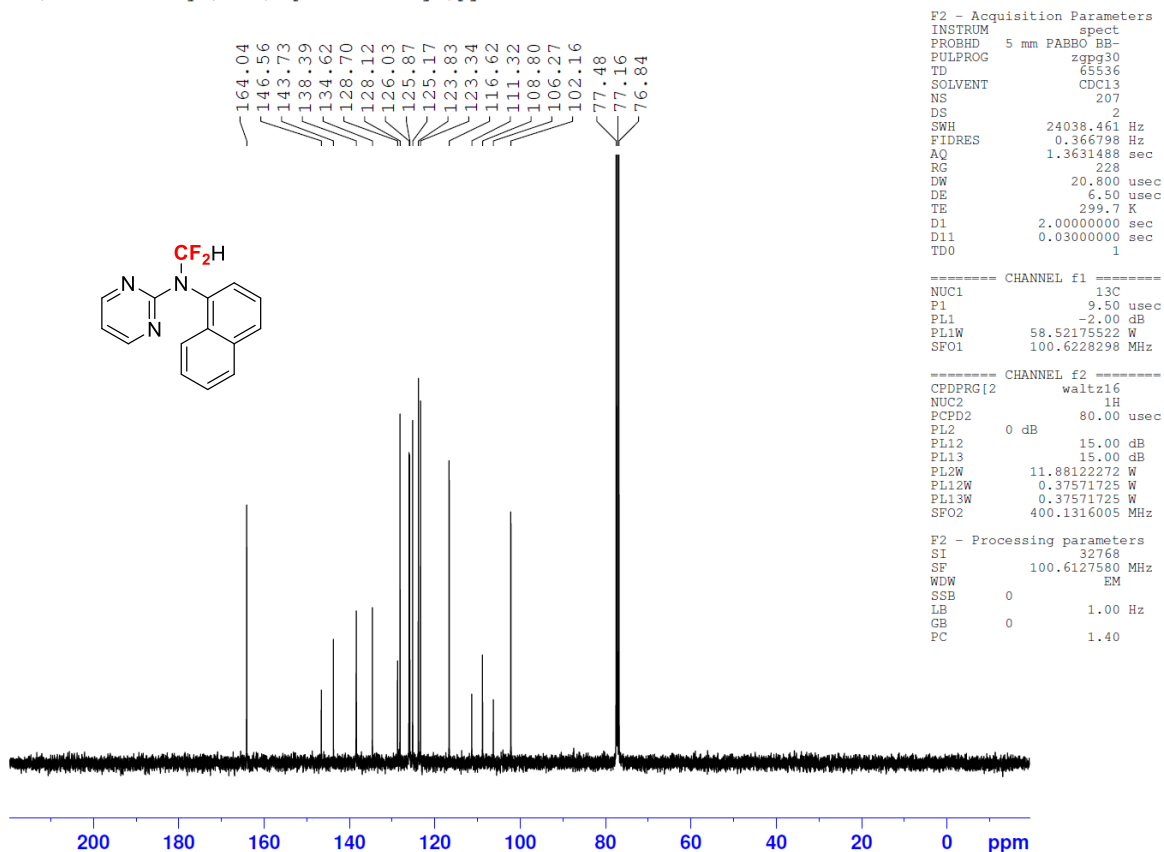

N- (Difluoromethyl)-N- (naphthalen-1-yl)pyrimidin-2-amine 19F

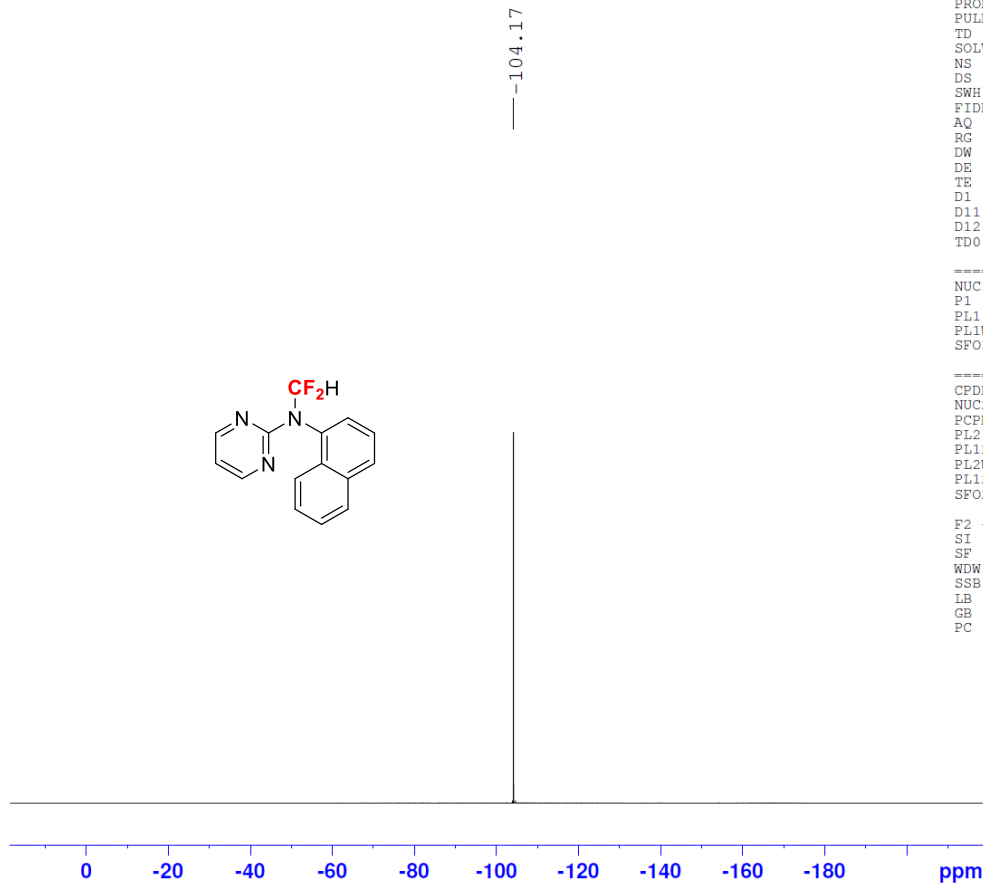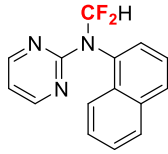

F2 - Acquisition Parameters  
 INSTRUM spect  
 PROBHD 5 mm PABBO BB-  
 PULPROG zgfgqgn  
 TD 131072  
 SOLVENT CDCl3  
 NS 16  
 DS 4  
 SWH 89285.711 Hz  
 FIDRES 0.681196 Hz  
 AQ 0.7340032 sec  
 RG 1150  
 DW 5.600 usec  
 DE 6.50 usec  
 TE 300.2 K  
 D1 1.00000000 sec  
 D11 0.03000000 sec  
 D12 0.00002000 sec  
 TD0 1

===== CHANNEL f1 =====  
 NUC1 19F  
 P1 14.20 usec  
 PL1 -3.00 dB  
 PL1W 18.69428444 W  
 SFO1 376.4607164 MHz

===== CHANNEL f2 =====  
 CPDPRG[2] waltz16  
 NUC2 1H  
 PCPD2 80.00 usec  
 PL2 0 dB  
 PL12 15.00 dB  
 PL2W 11.88122272 W  
 PL12W 0.37571725 W  
 SFO2 400.1316005 MHz

F2 - Processing parameters  
 SI 65536  
 SF 376.4983660 MHz  
 WDW EM  
 SSB 0  
 LB 0.30 Hz  
 GB 0  
 PC 1.00

## 10. <sup>1</sup>H spectra for D-labelling experiments

### Addition of D<sub>2</sub>O

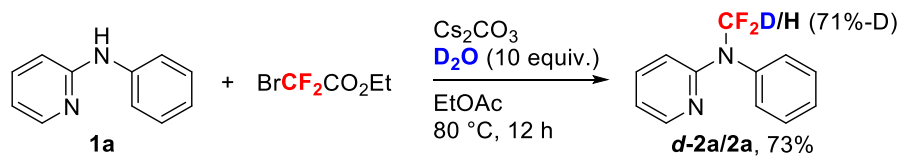

N-(Difluoromethyl-d)-N-phenylpyridin-2-amine & N-(Difluoromethyl)-N-phenylpyridin-2-amine 1H

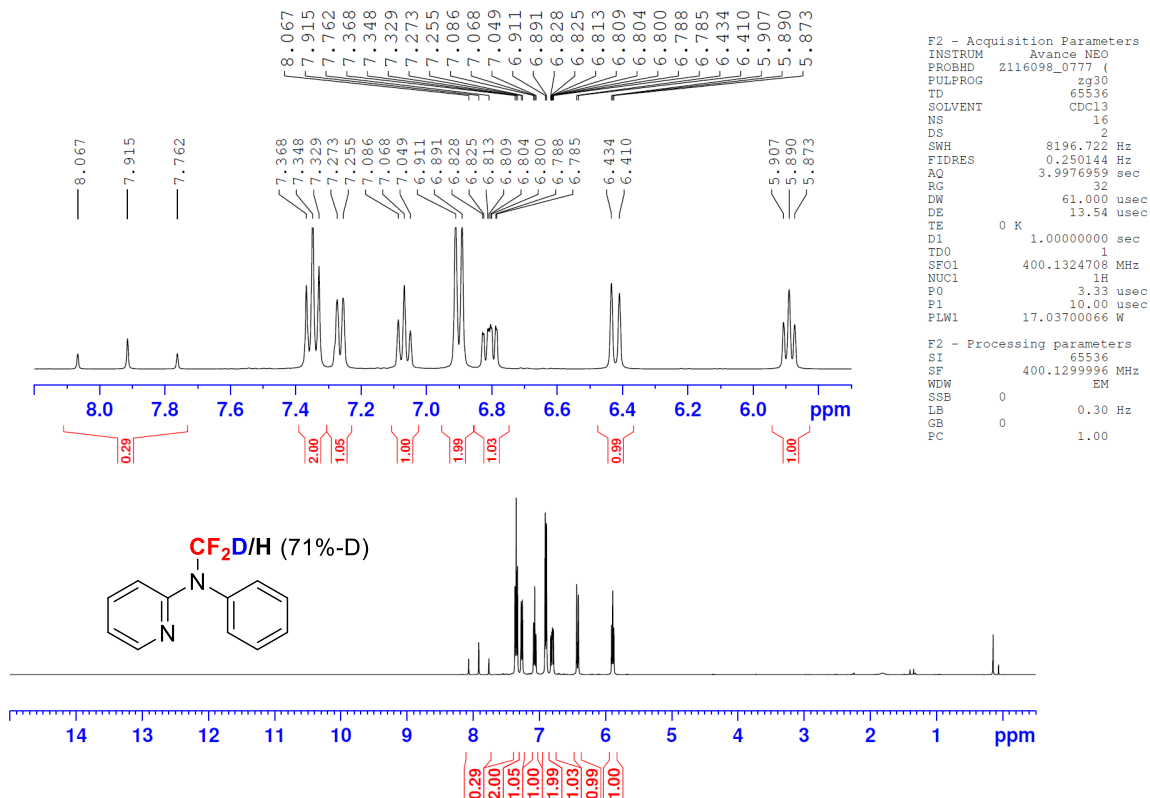

## Addition of H<sub>2</sub>O

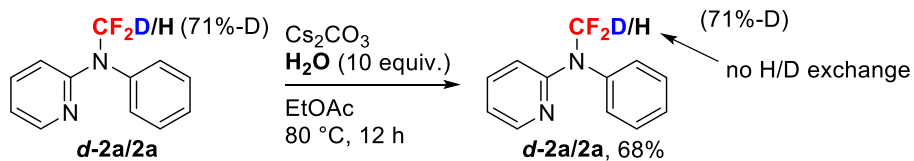

N-(Difluoromethyl-d)-N-phenylpyridin-2-amine & N-(Difluoromethyl)-N-phenylpyridin-2-amine 1H

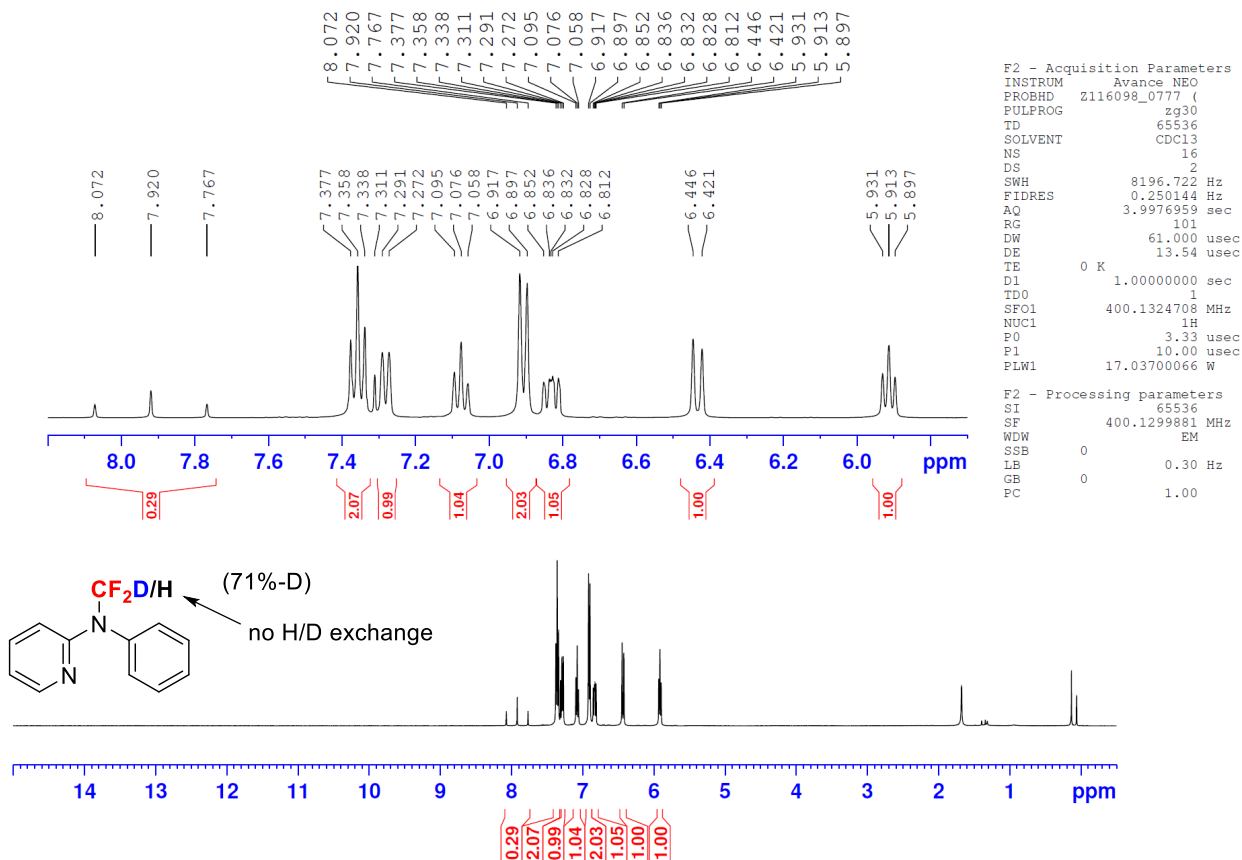

# Investigation of proton source in difluoromethyl moiety

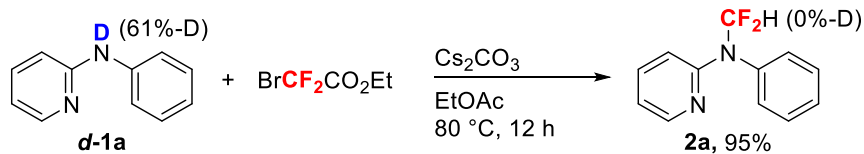

N-phenylpyridin-2-amine 1H

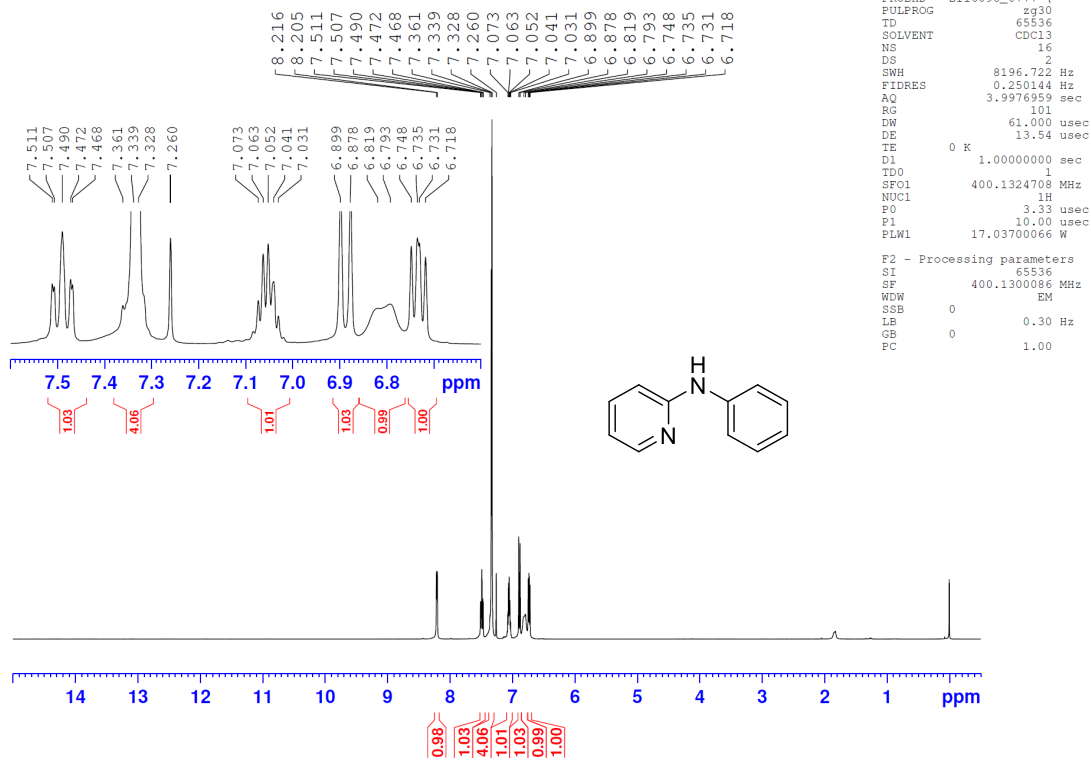

N-Phenylpyridin-2-amine-d (61%D) 1H

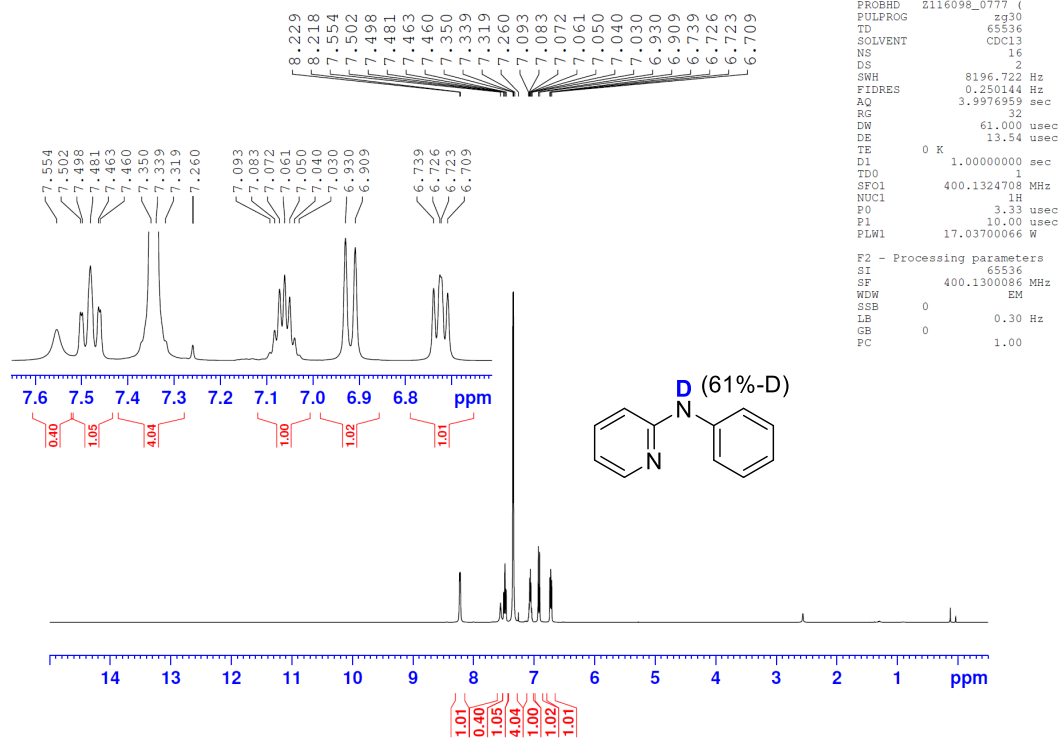

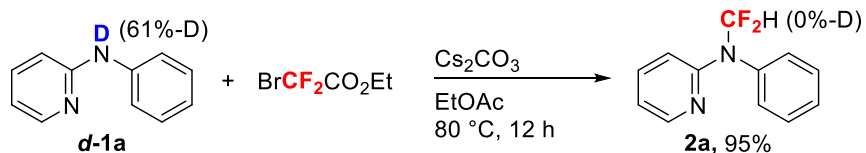

N-(Difluoromethyl)-N-phenylpyridin-2-amine 1H

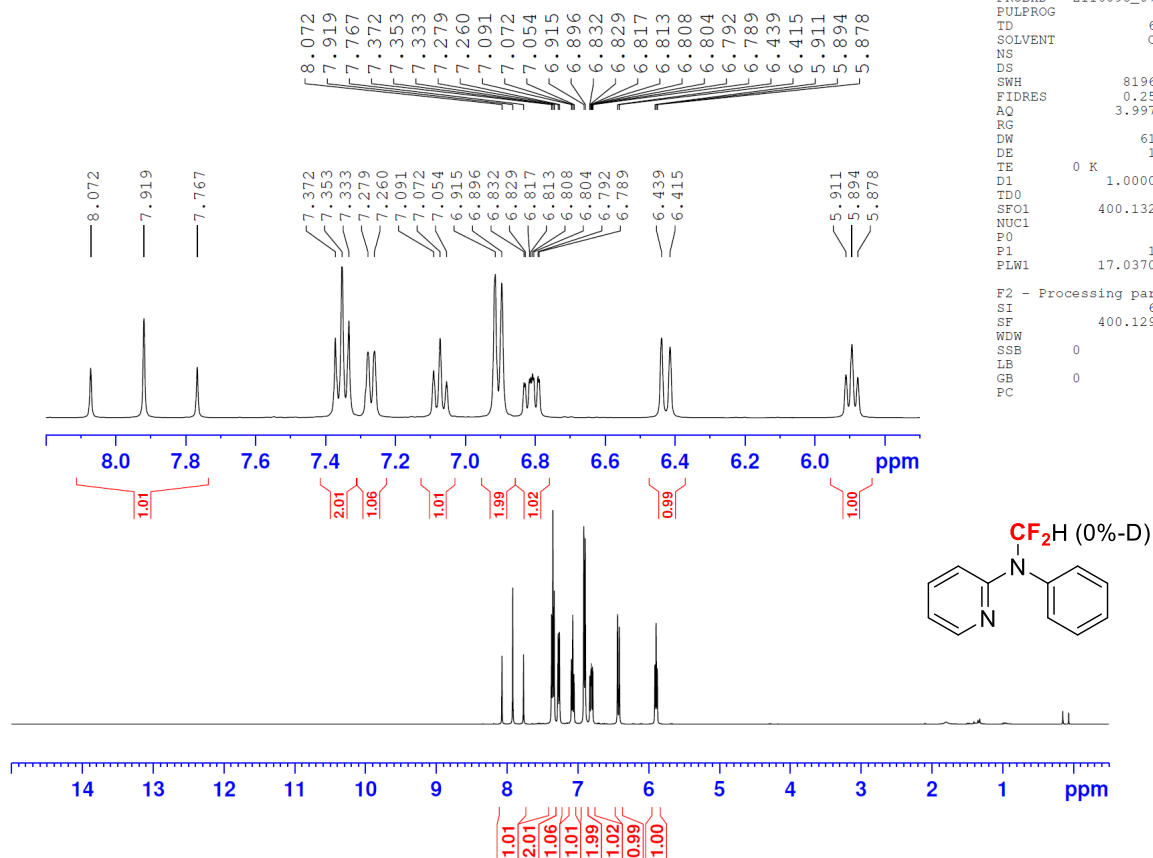

## 11. References

---

- 1 D. Wang, D. Kuang, F. Zhang, Y. Liu, and S. Ning, *Tetrahedron Lett.*, 2014, **55**, 7121.
- 2 X. Huang, S. Xu, Q. Tan, M. Gao, M. Li, and B. Xu, *Chem. Commun.*, 2014, **50**, 1465.
